# Supplementary material for: Synthesis, Structure, and Antifungal Activities of 3-(Difluoromethyl)-Pyrazole-4-Carboxylic Oxime Ester Derivatives
Source: Hindawi journal article supplement (doi:10.1155/2022/6078017), 2022-08-28
Supplement: f1 [file 6078017.f1.docx]

**Supplemental Materials**

**Synthesis, Structure and Antifungal Activities of 3-(Difluoromethyl)-Pyrazole-4-carboxylic Oxime Ester Derivatives**

Bin Wang1,3,Wei-Ting Chen1,3,Li-Jing Min2, Liang Han1, Na-Bo Sun3*, Xing-Hai Liu1*

1College of Chemical Engineering, Zhejiang University of Technology, Hangzhou, 310014, China

2 College of Life Science, Key Laboratory of Vector Biology and Pathogen Control of Zhejiang Province, Huzhou University, Huzhou, 313000, Zhejiang, China

3College of Biology and Environmental Engineering, Zhejiang Shuren University, Hangzhou 310015, Zhejiang, China

**Table of contents**

1. Crystal structure………...................... ..... .......... ... .......... ... .......... .....................................2-3
2. The spectroscopy of target compounds………...................... ................................................4-22

### Crystal structure

The compound (*E*)-4-methylbenzaldehyde *O*-(3-(difluoromethyl)-1-methyl-1*H*-pyrazole-4-carbonyl) oxime **5d** was further characterized by X-ray diffraction analysis and the bond and molecular structures are illustrated in Table 3 and Figure3. The bond angles and lengths of pyrazole ring and the phenyl ring are in normal range[32]-[33]. As shown in Fig.4, the phenyl ring (**5d**(C(8)～C(13)) is almost in the same plane with pyrazole ring (**5d**(N(1), N(2), C(2), C(3), C(4))), which dihedral angle (θ) is 6.3º with plane equation **5d** (11.876x + -0.025y + 2.173z = 3.4031, 13.076x + -0.208y + 0.766z = 2.3001). The torsion angle of **5d** (C(3)-C(6)-O(2)-N(3), O(2)-N(3)-C(7)-C(8), C(6)-O(2)-N(3)-C(7)) was 179.20(13)°, 179.73(15)°, 172.50(15)°, respectively, which showed the oxime ester bridge is nearly in the same plane.

Table3: Selected bond angles and lengths for (E)-4-methylbenzaldehyde O-(3-(difluoromethyl)-1-methyl-1*H*-pyrazole-4-carbonyl) oxime **5d**

| No. | Bond | Dist. (Å) | Angle | (°) |
| --- | --- | --- | --- | --- |
| **5d** | F(1)-C(5) | 1.349(2) | C(6)-O(2)-N(3) | 112.34(12) |
| O(1)-C(6) | 1.199(2) | C(7)-N(3)-O(2) | 108.87(14) |
| N(3)-O(2) | 1.4377(17) | N(2)-N(3)-C(1) | 118.94(14) |
| O(2)-C(6) | 1.349(2) | N(2)-C(2)-C(3) | 106.75(14) |
| N(3)-C(7) | 1.247(2) | C(2)-N(2)-N(1) | 112.56(13) |
| N(2)-C(1) | 1.450(2) | O(1)-C(6)-C(3) | 124.21(15) |
| N(1)-C(4) | 1.319(2) | O(1)-C(6)-O(2) | 124.78(15) |
| N(2)-N(1) | 1.352(2) | C(8)-C(9)-C(10) | 120.44(18) |
| N(8)-C(1) | 1.321(2) | N(3)-C(7)-C(8) | 121.83(16) |
| C(7)-C(8) | 1.461(2) | C(10)-C(11)-C(14) | 121.0(2) |
| C(8)-C(13) | 1.385(2) | F(1)-C(5)-F(2) | 105.38(15) |

The compound **5d** has four intermolecular hydrogen bonds and the parameters of these four hydrogen bonds are listed in Table 3, which are linked by C-H…O and C-H…F(Figure 3). From Figure 3, the intramolecular C-H…F and C-H…O hydrogen bonds formed a fourteen member ring in the molecule. The hydrogen bond interactions strengthen the integration of the 2D layer networks.

**Figure 4. Molecular packing of the title compound 5d**

Table 4. Hydrogen-bond Parameters (Ǻ) of Compound **5d**

| No. | D－H…A | d(D-H) | d(H…A) | d(D…A) | ∠(DHA) |
| --- | --- | --- | --- | --- | --- |
| **5d** | C(1)-H(1B)...O(1)1 | 0.96 | 2.40 | 3.303(2) | 156.7 |
| C(2)-H(2)...O(1)1 | 0.93 | 2.63 | 3.352(2) | 134.5 |
| C(5)-H(5)...O(1)2 | 0.98 | 2.51 | 3.415(2) | 153.4 |
| C(7)-H(7)...F(1)1 | 0.93 | 2.64 | 3.471(2) | 149.3 |


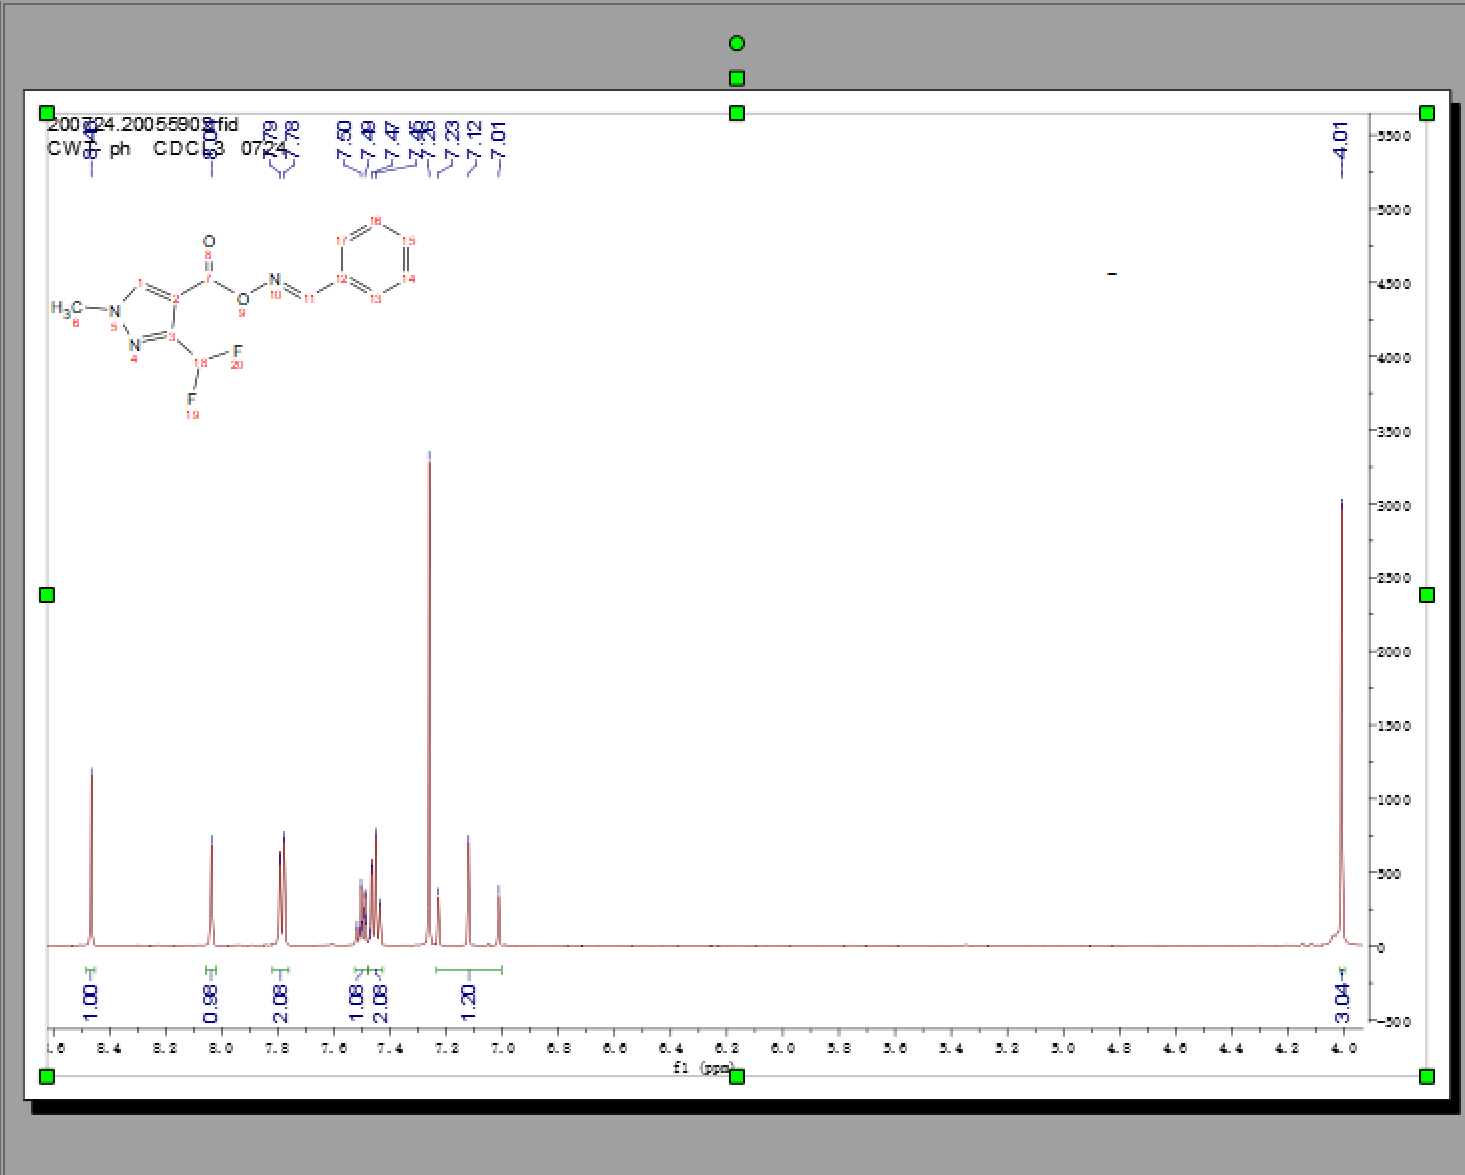
The 1H NMR of compound 5a


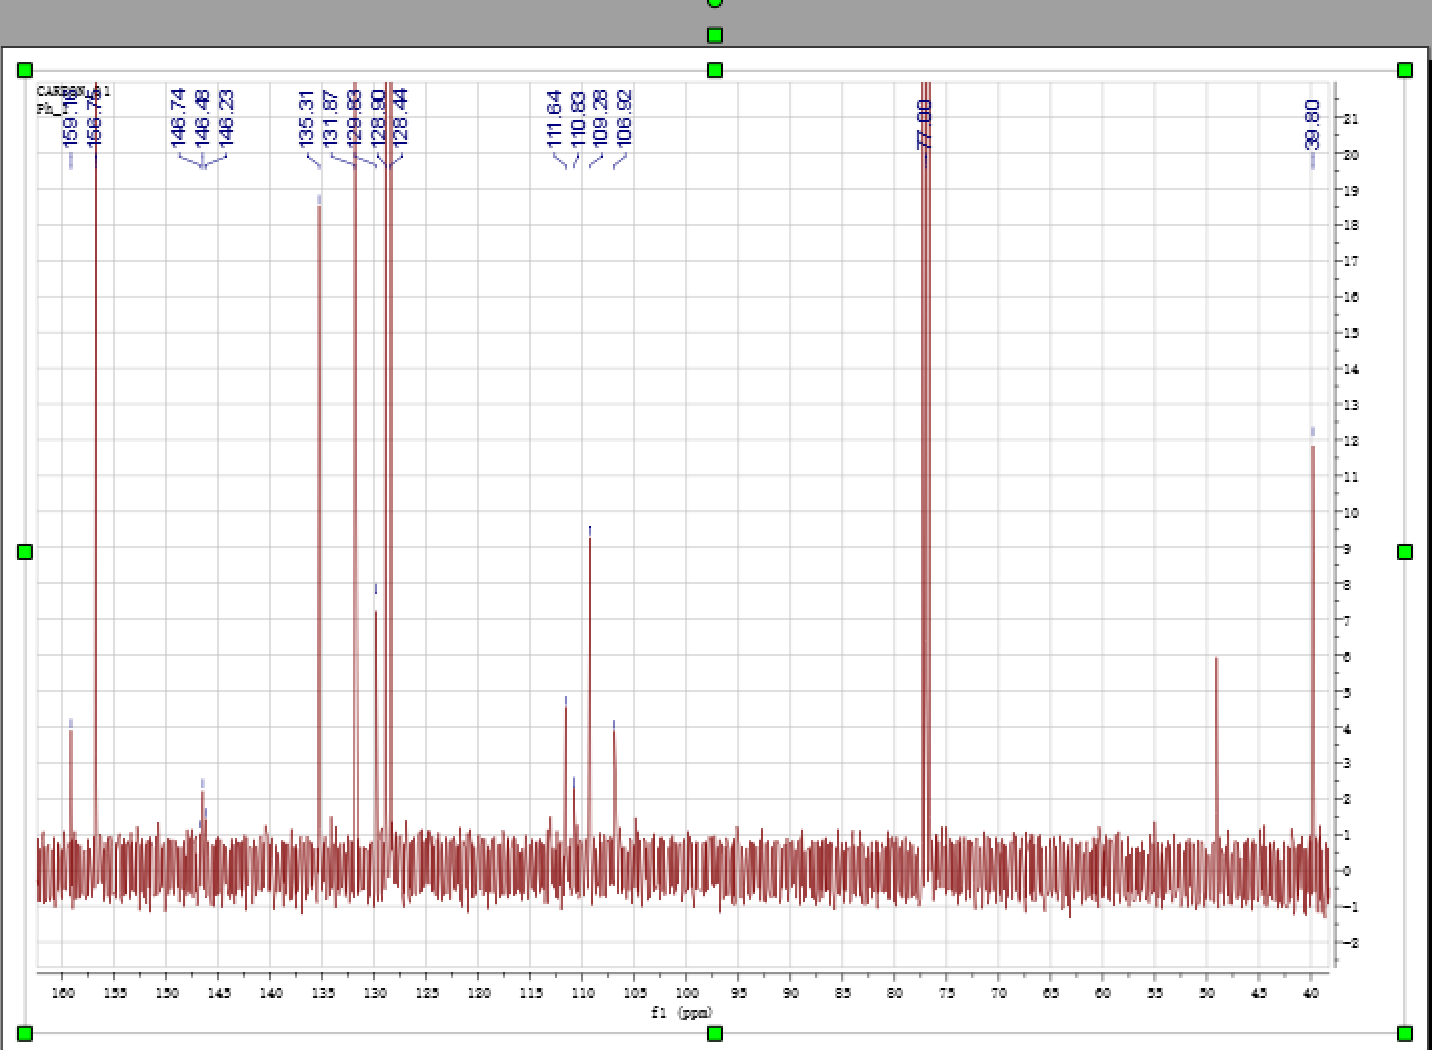


The 13C NMR of compound 5a


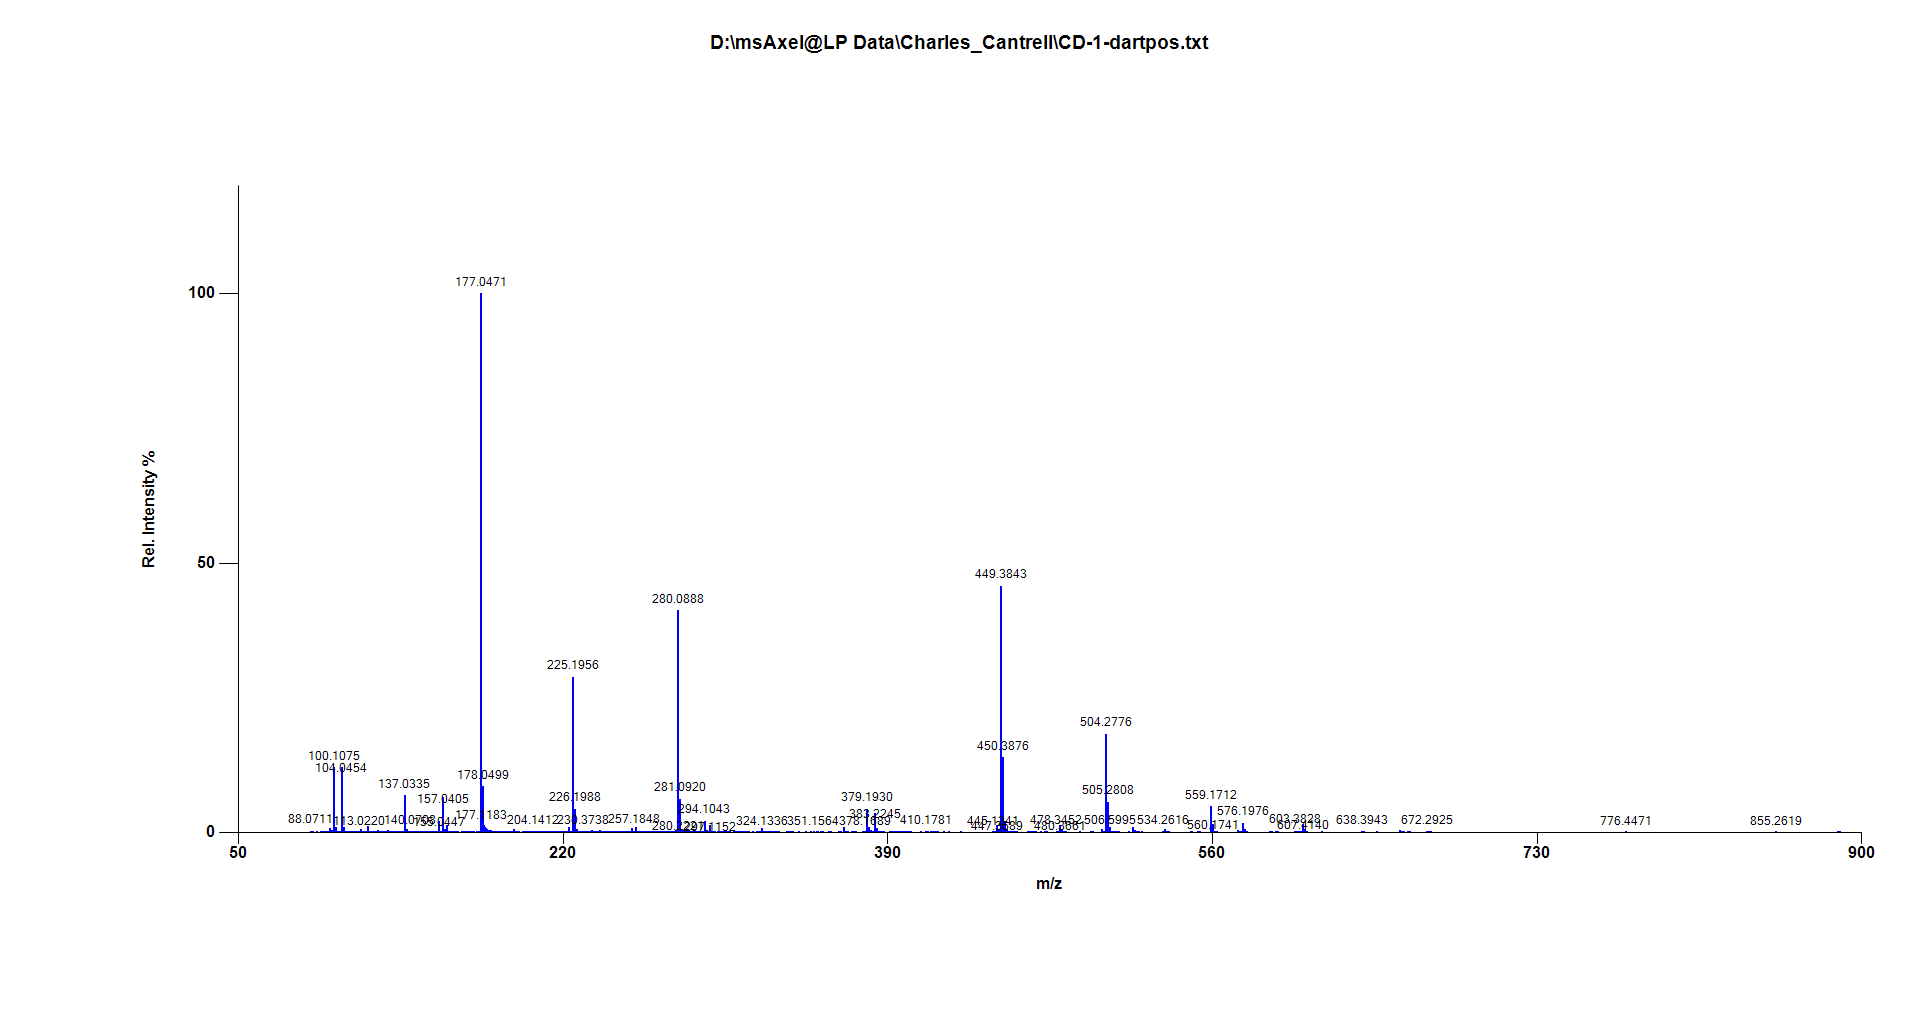


The HRMS of compound 5a

**
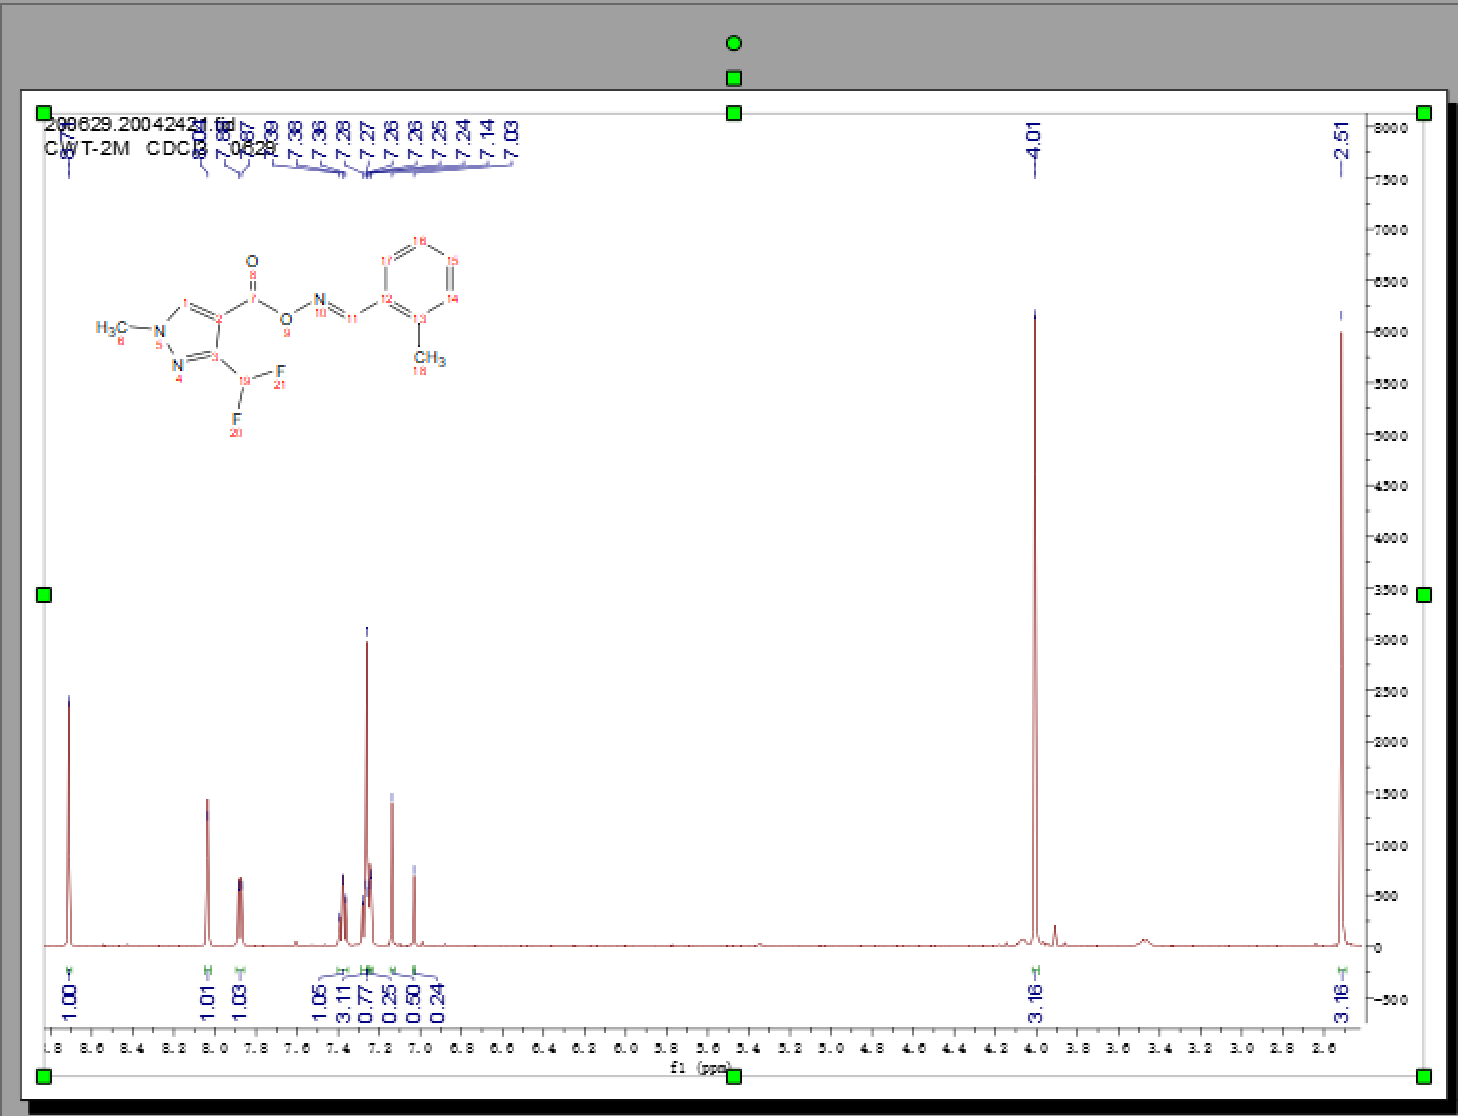
**

The 1H NMR of compound 5b

**
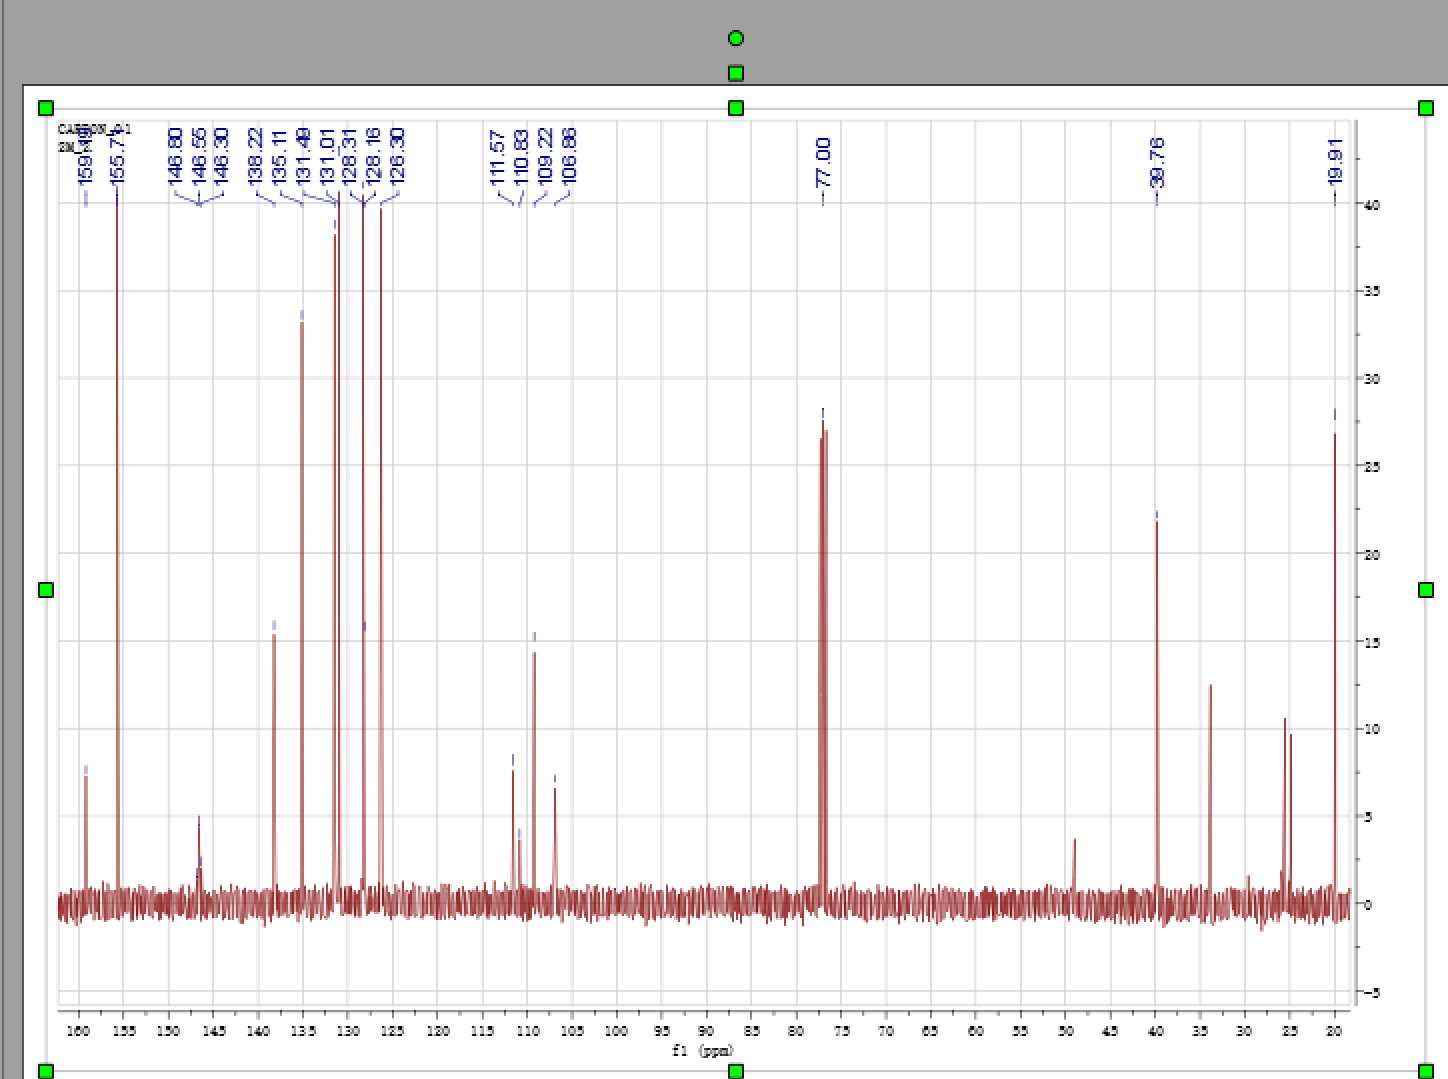
**

The 13C NMR of compound 5b


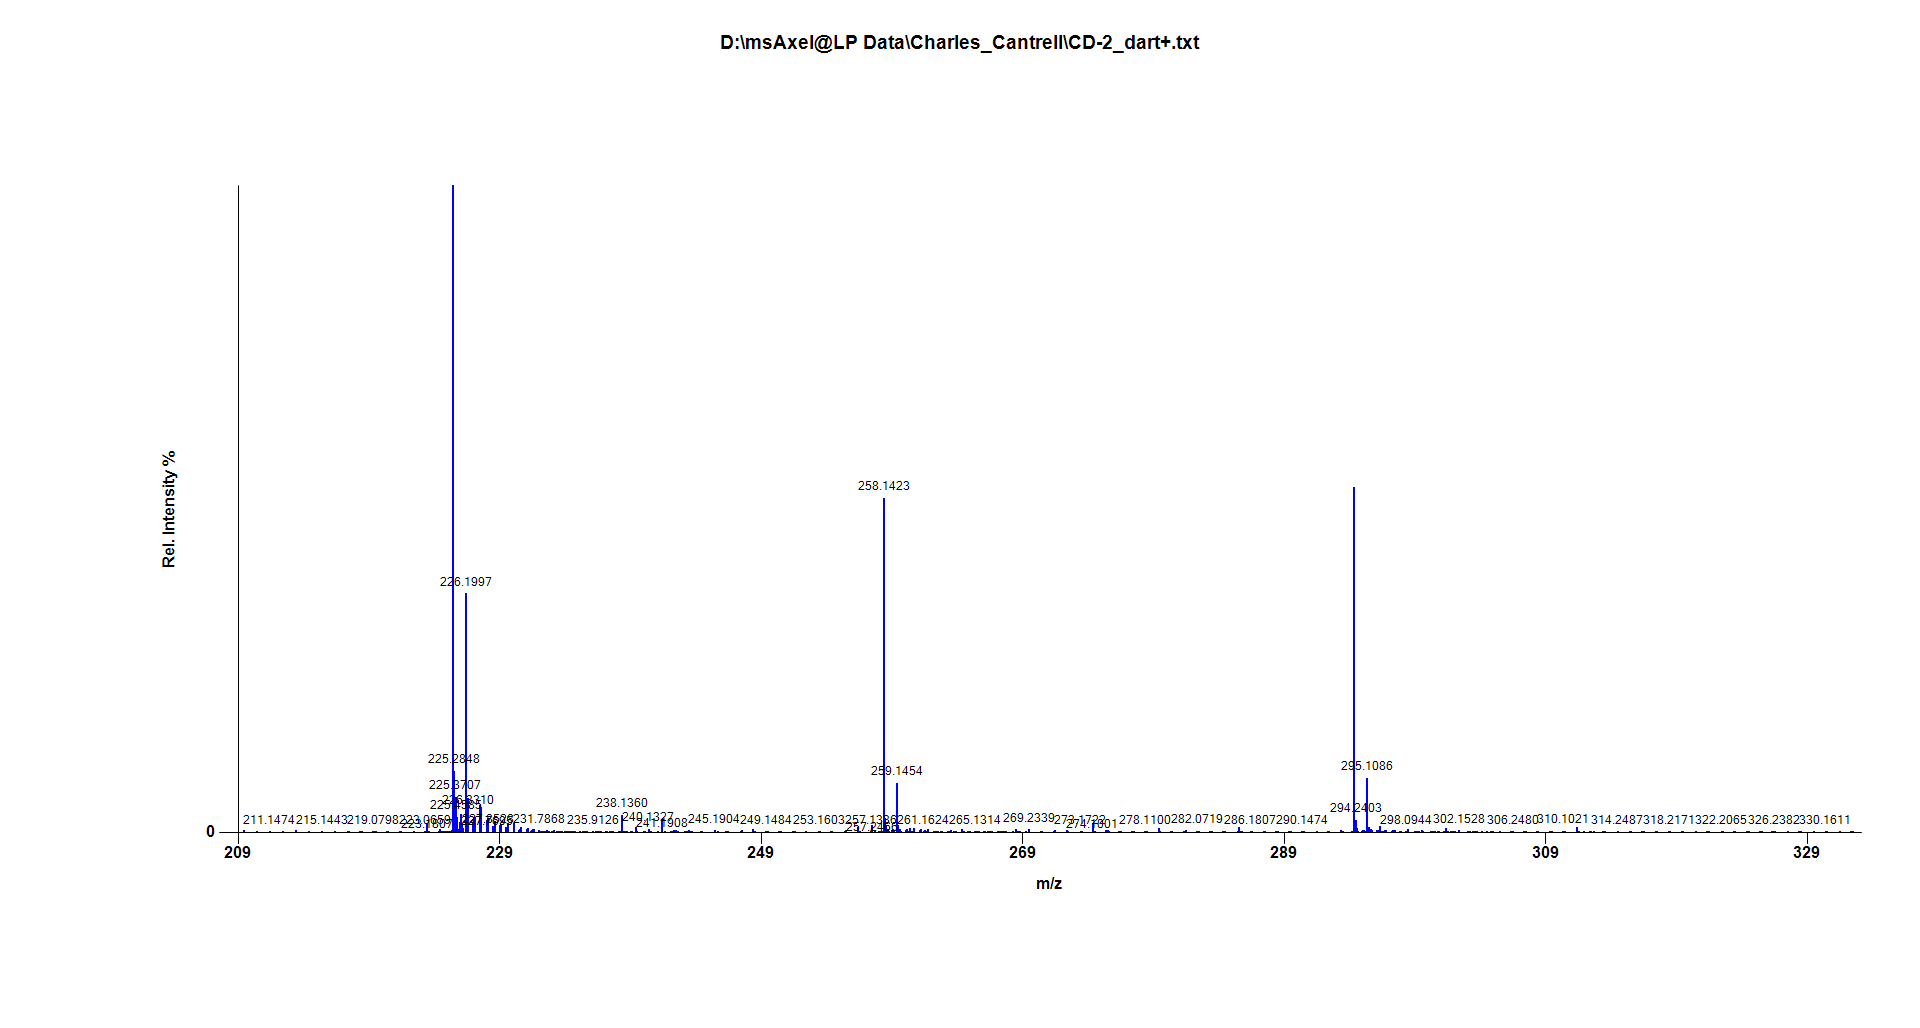


The HRMS of compound 5b

**
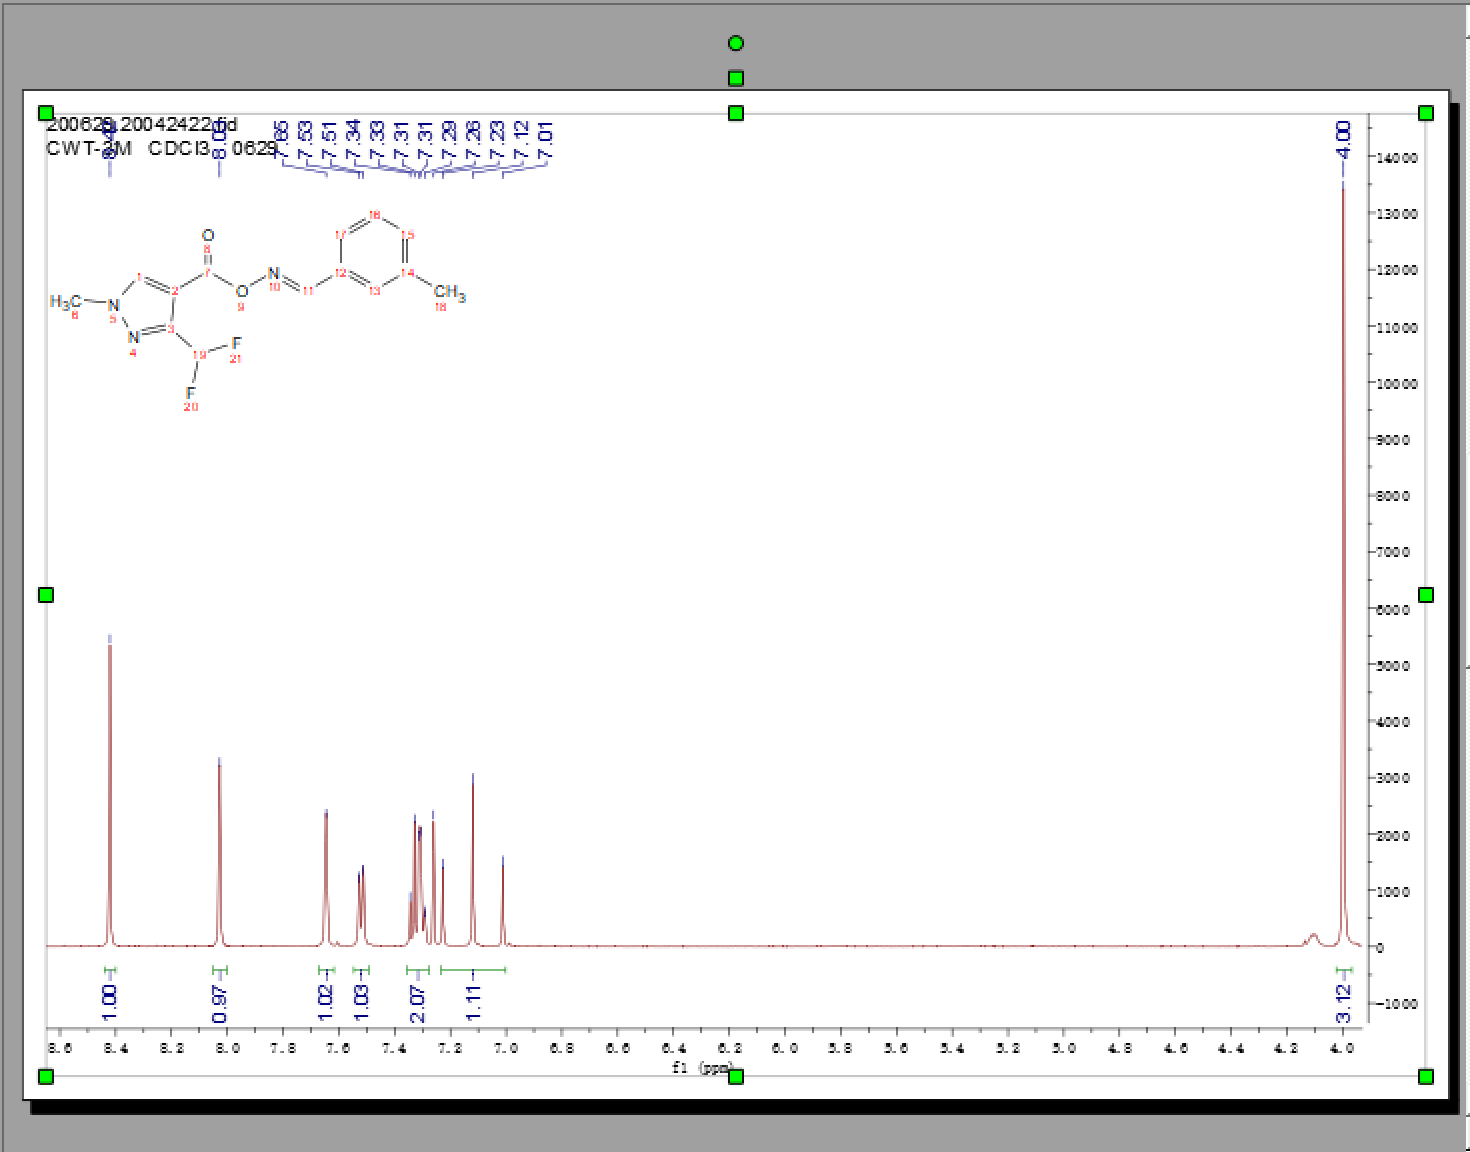
**

The 1H NMR of compound 5c

**
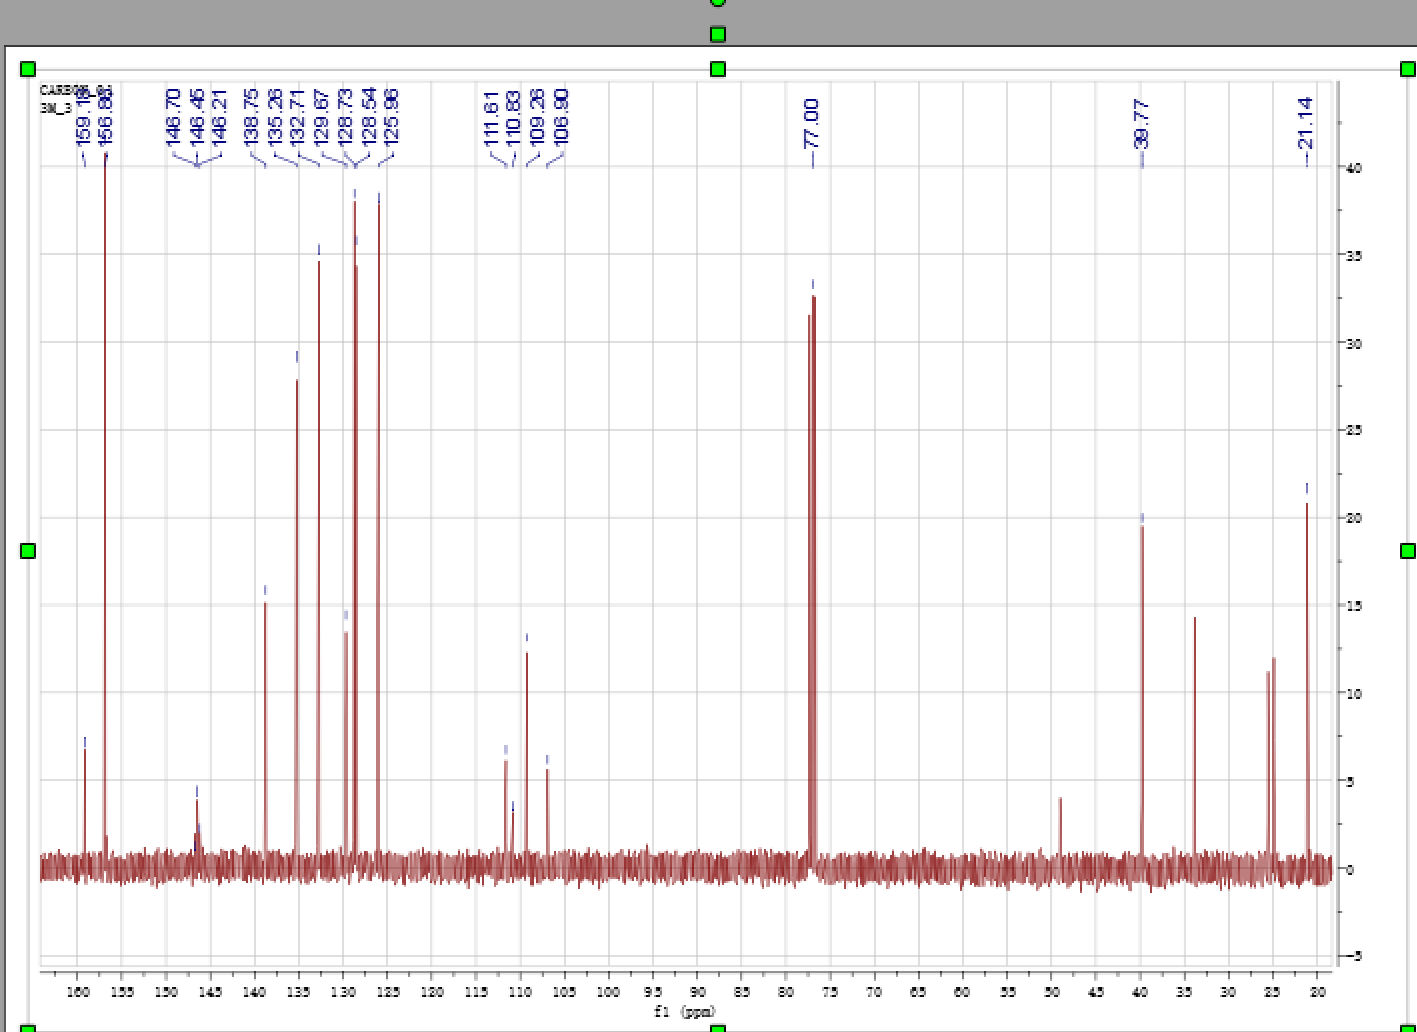
**

The 13C NMR of compound 5c


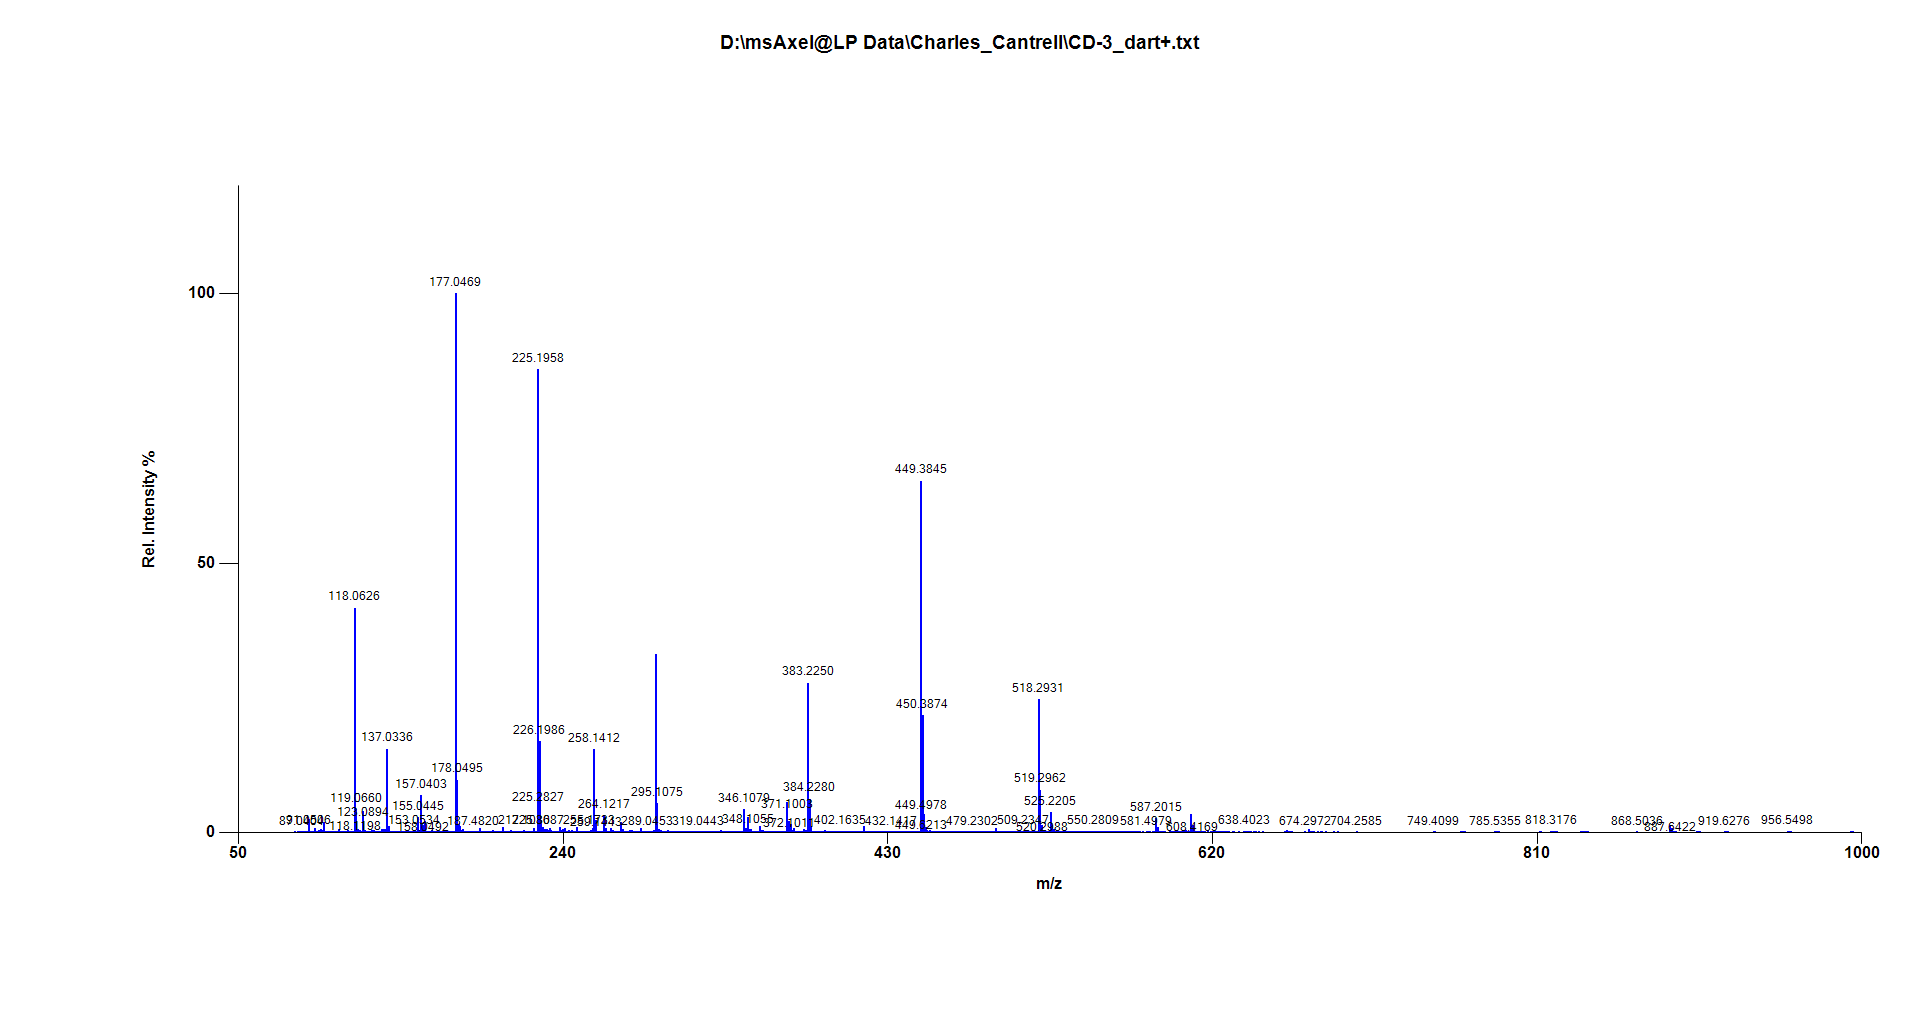


The HRMS of compound 5c

**
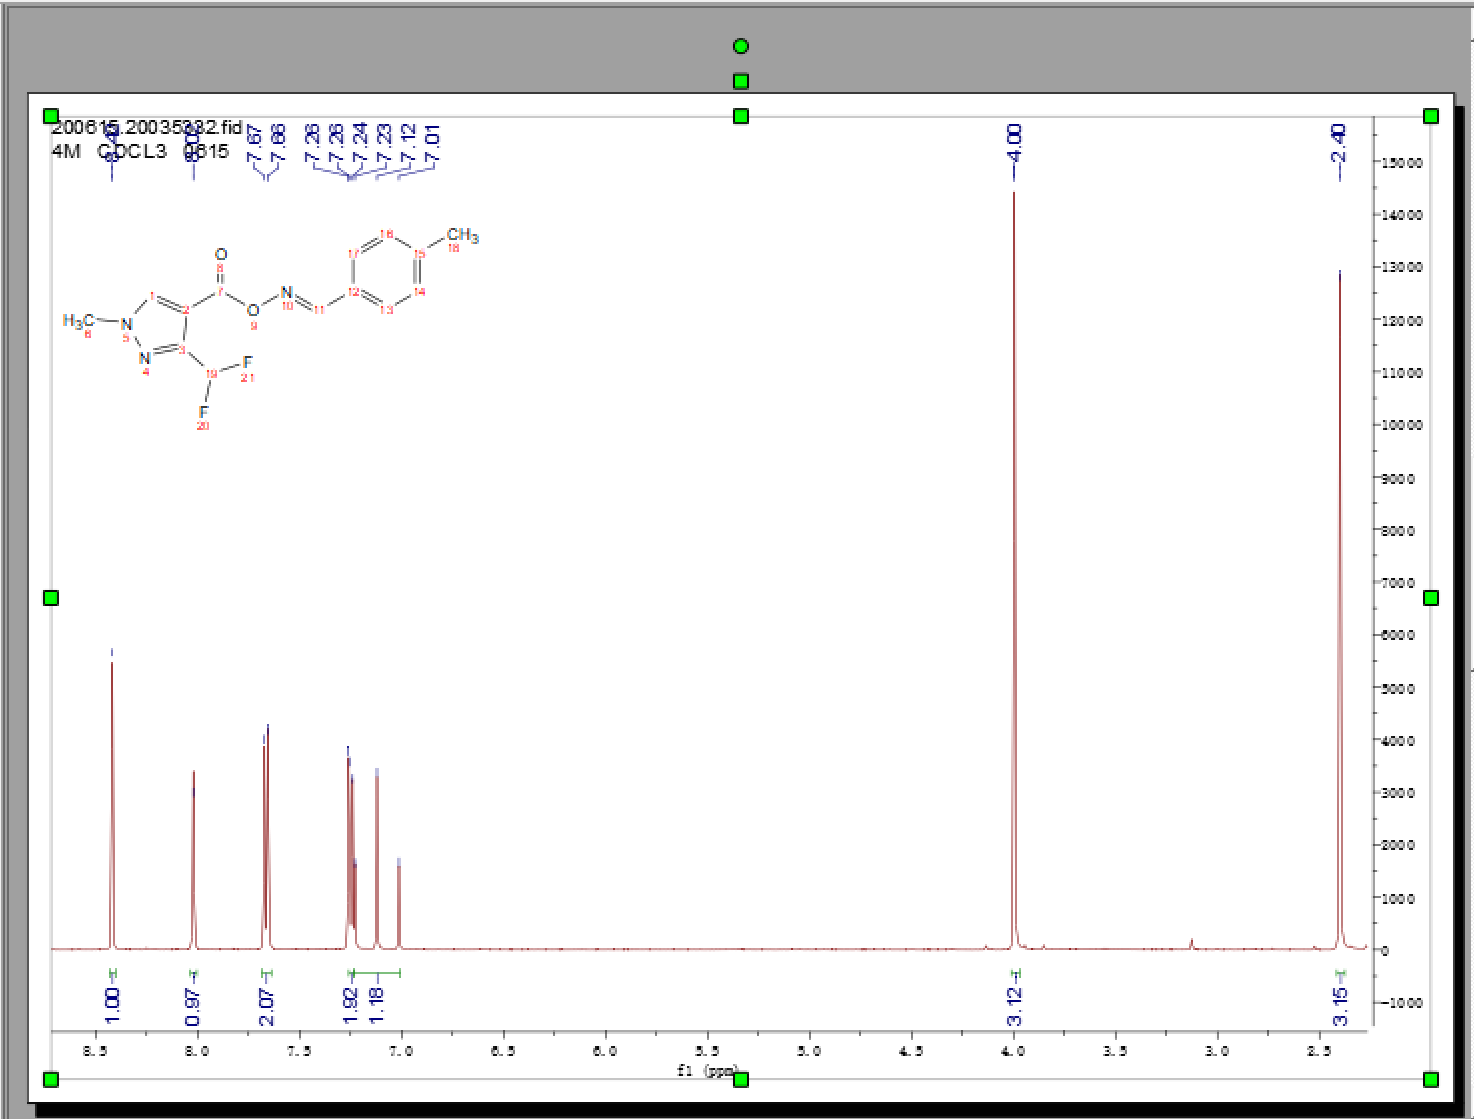
**

The 1H NMR of compound 5d


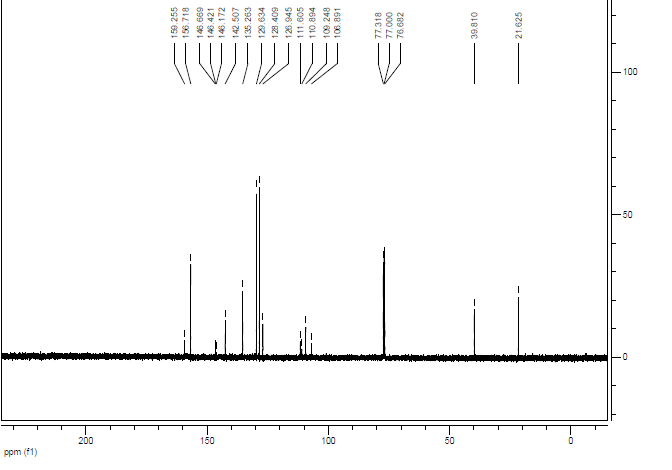


The13C NMR of compound 5d


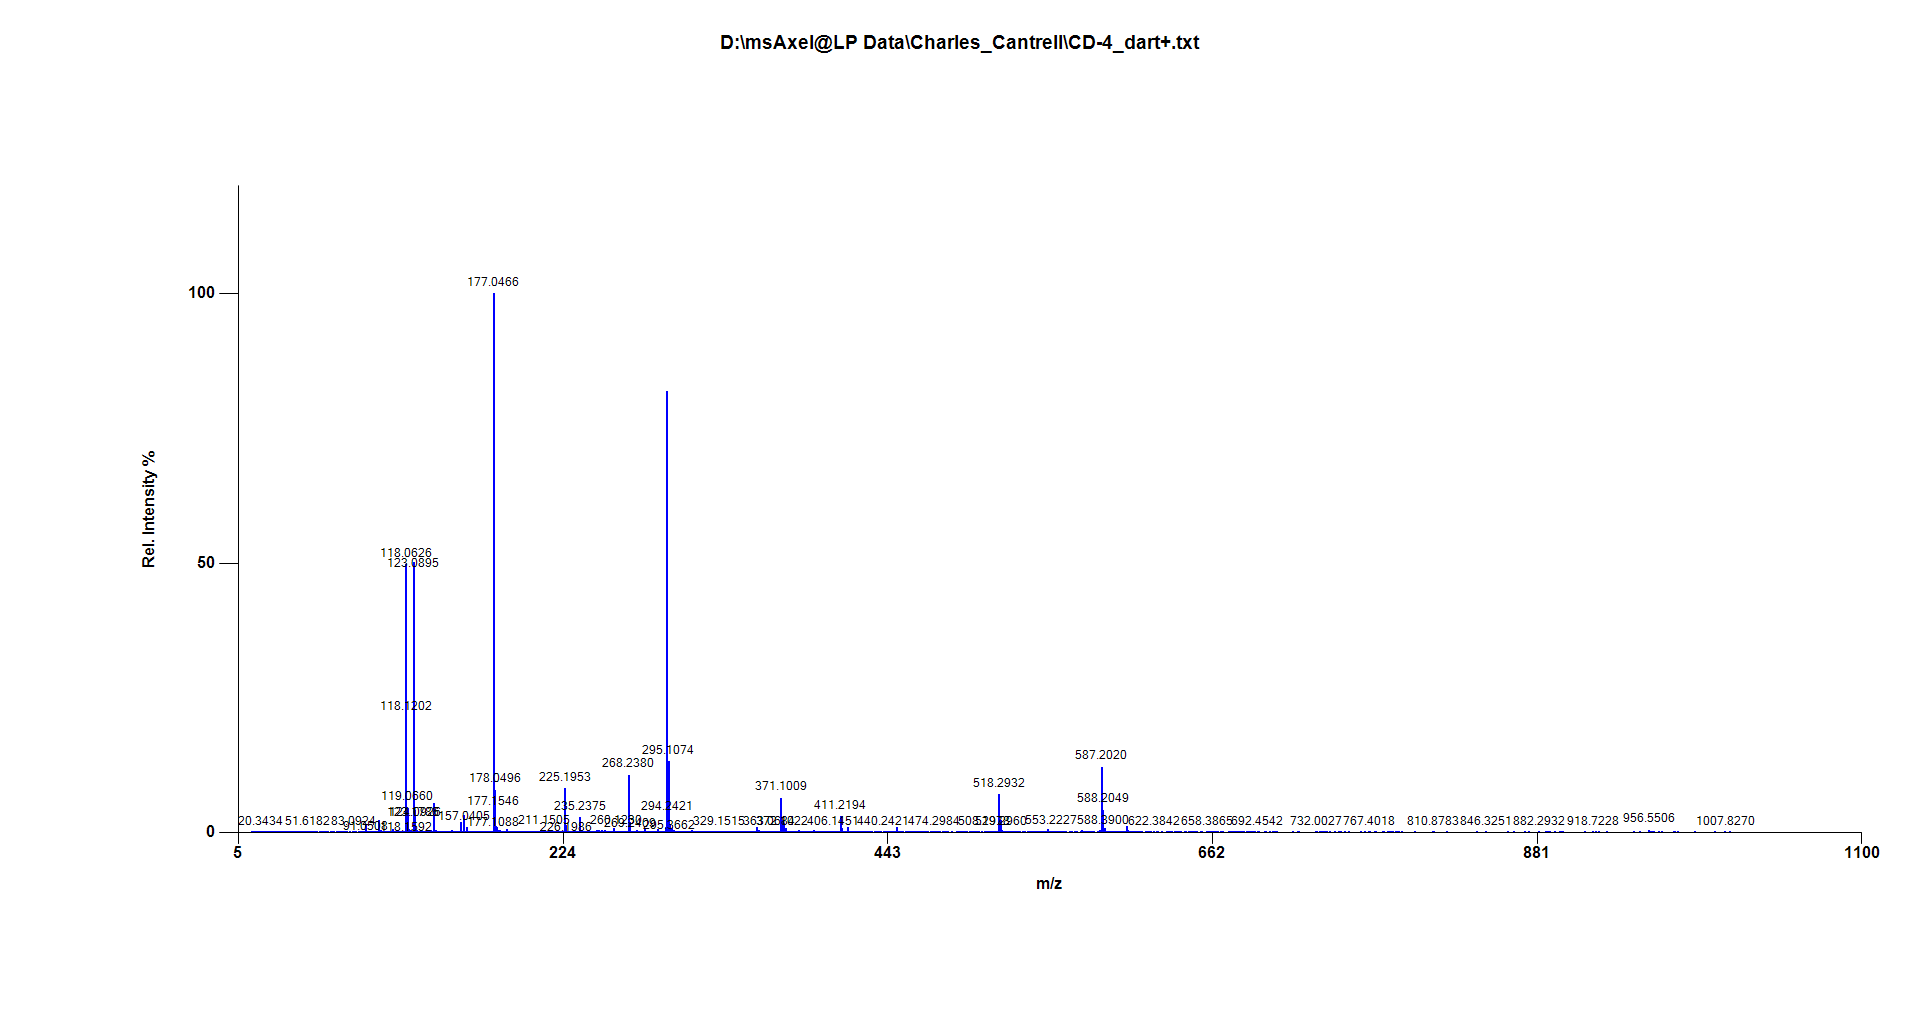


The HRMS of compound 5d

**
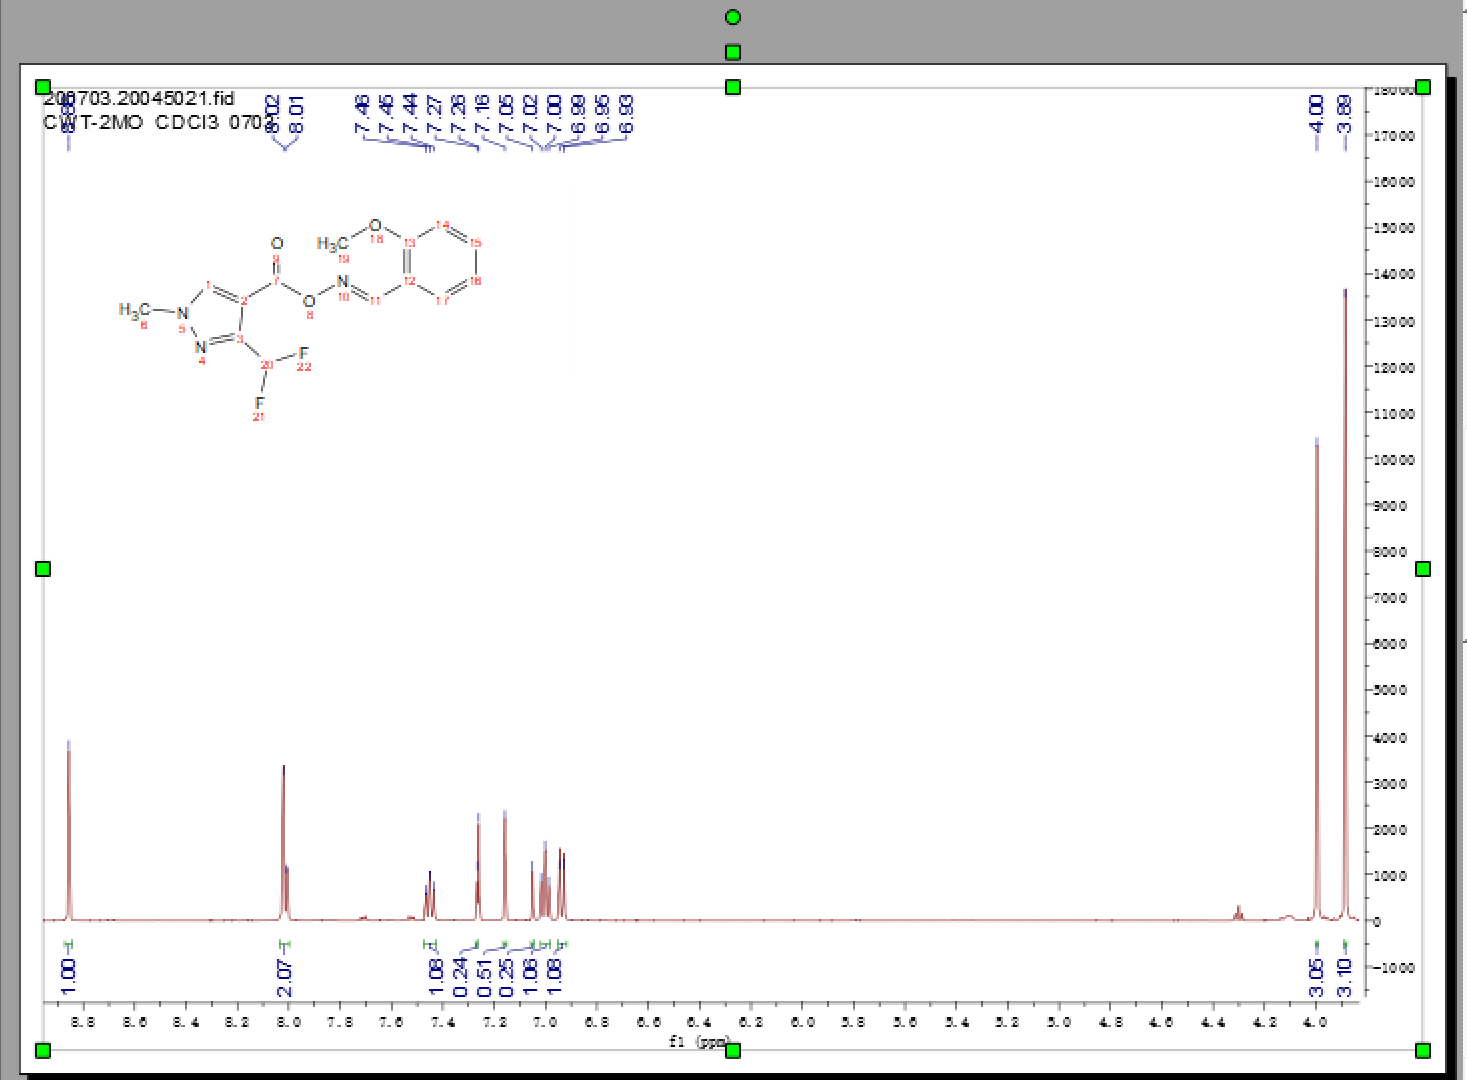
**

The 1H NMR of compound 5e


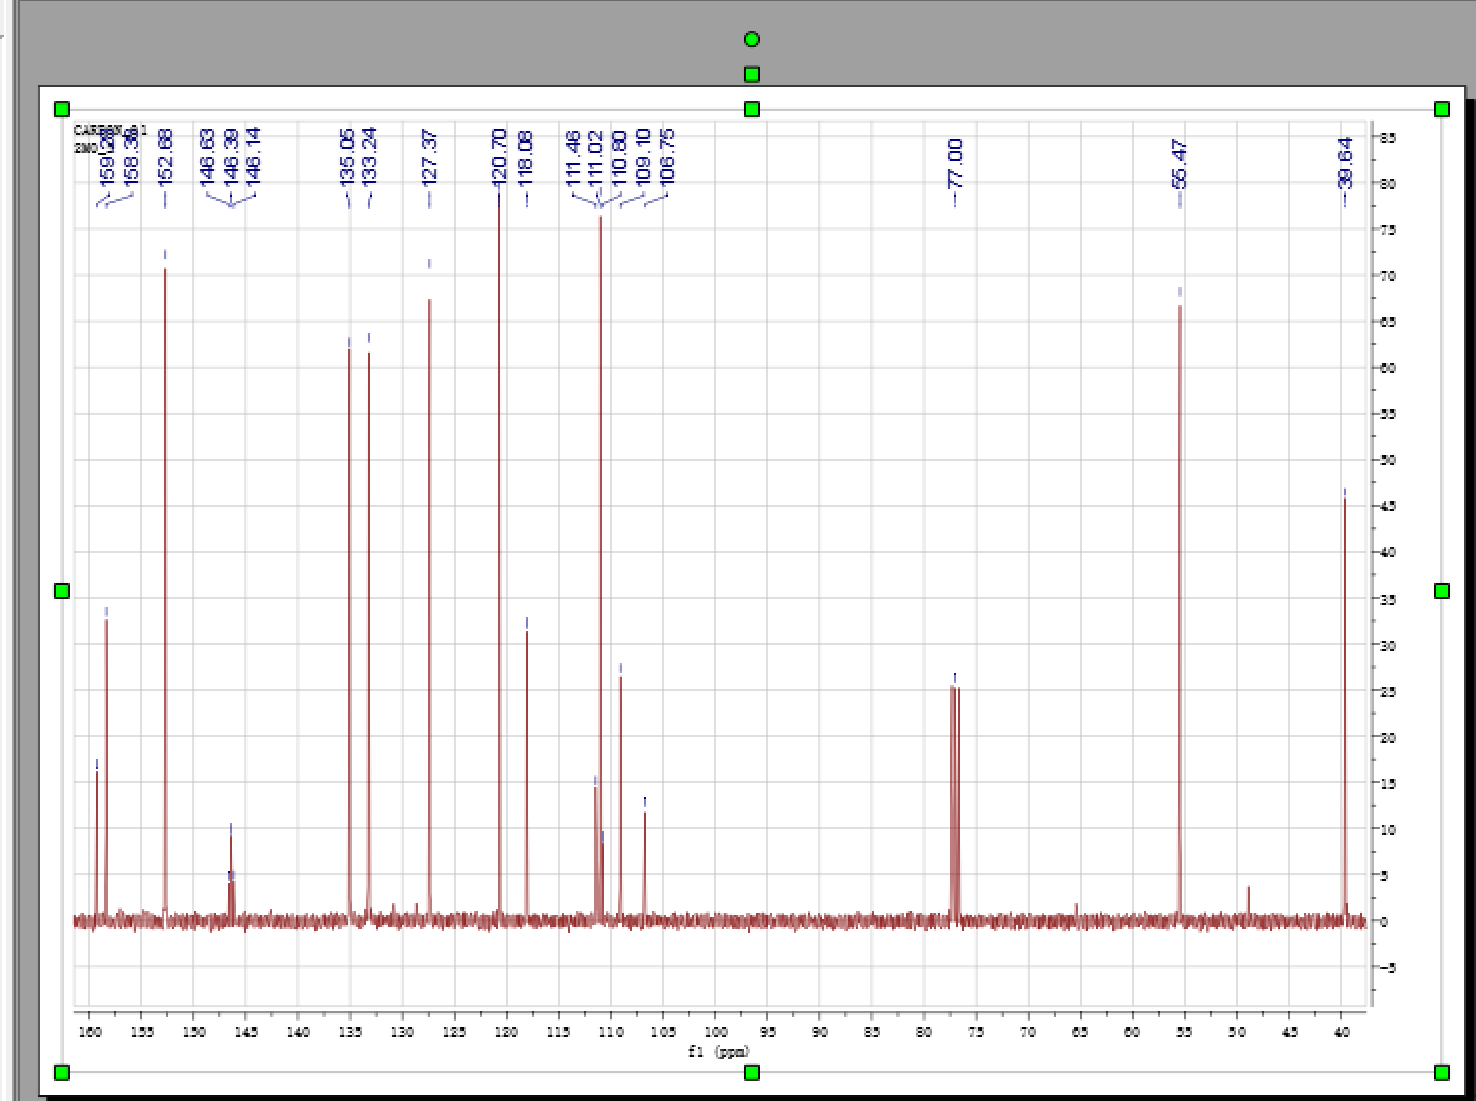


The13C NMR of compound 5e


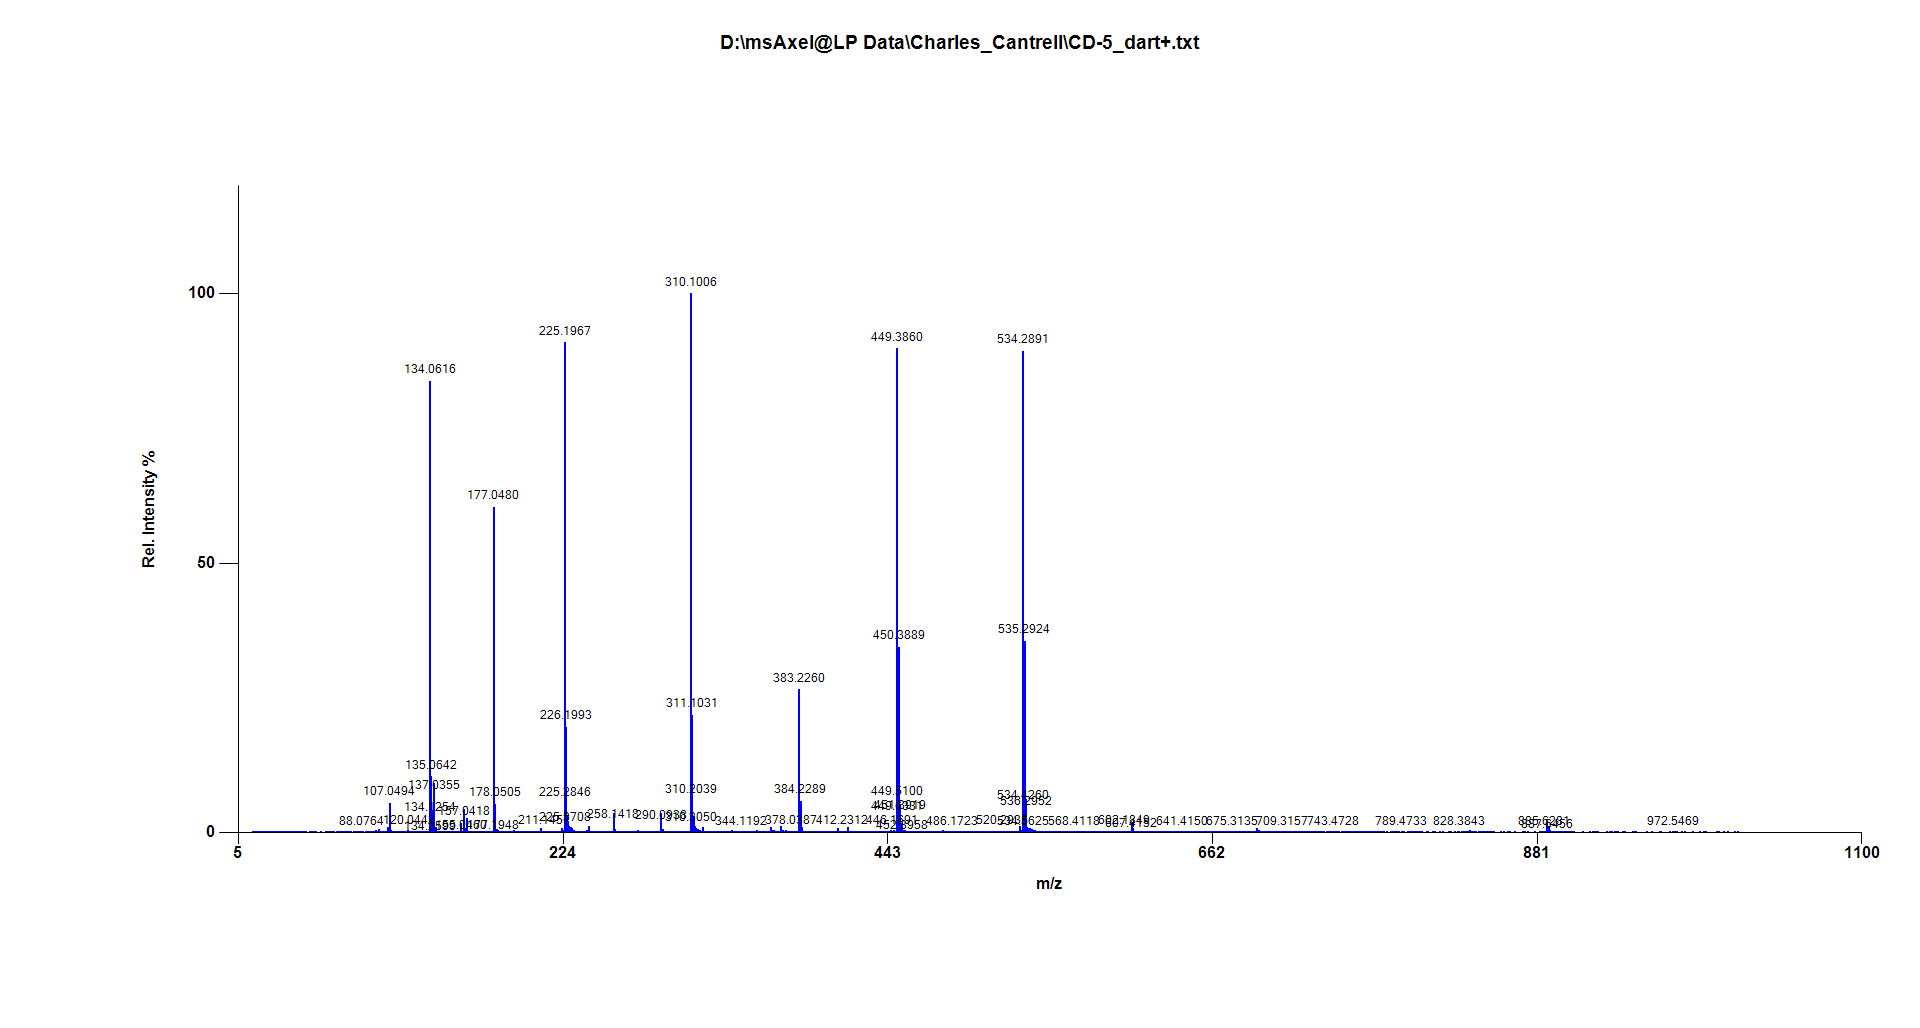


The HRMS of compound 5e

**
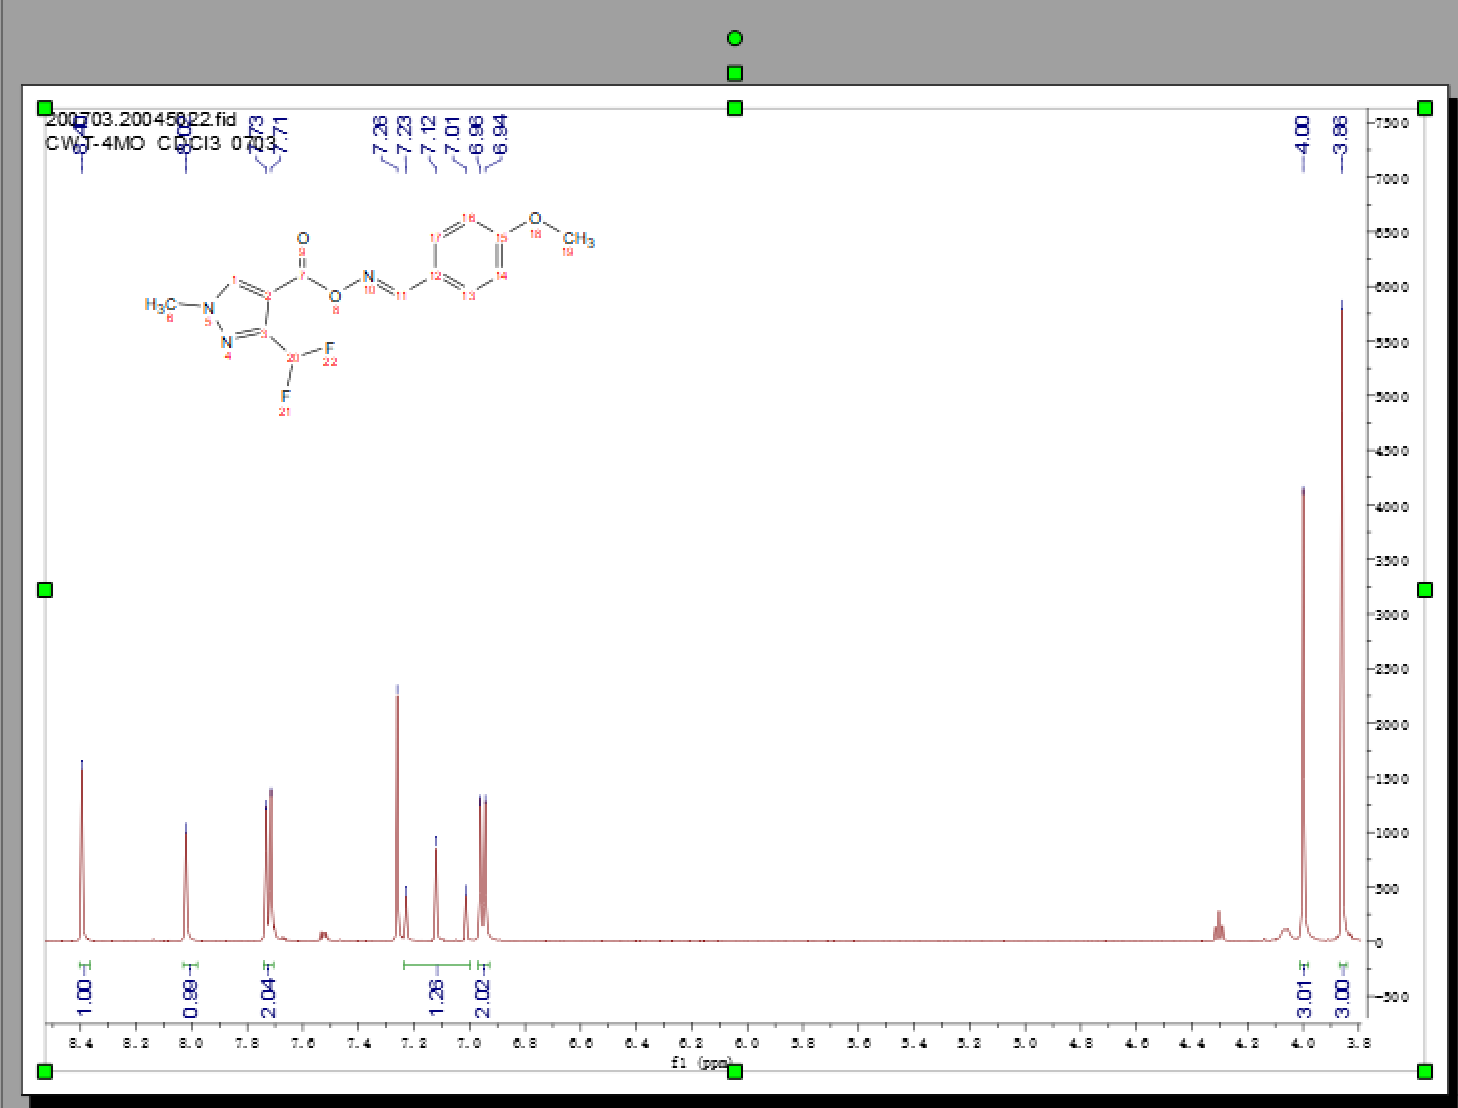
**

The 1H NMR of compound 5f


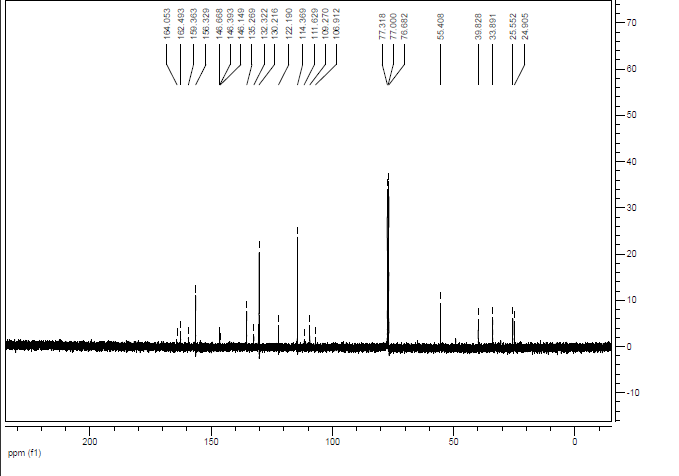


The13C NMR of compound 5f


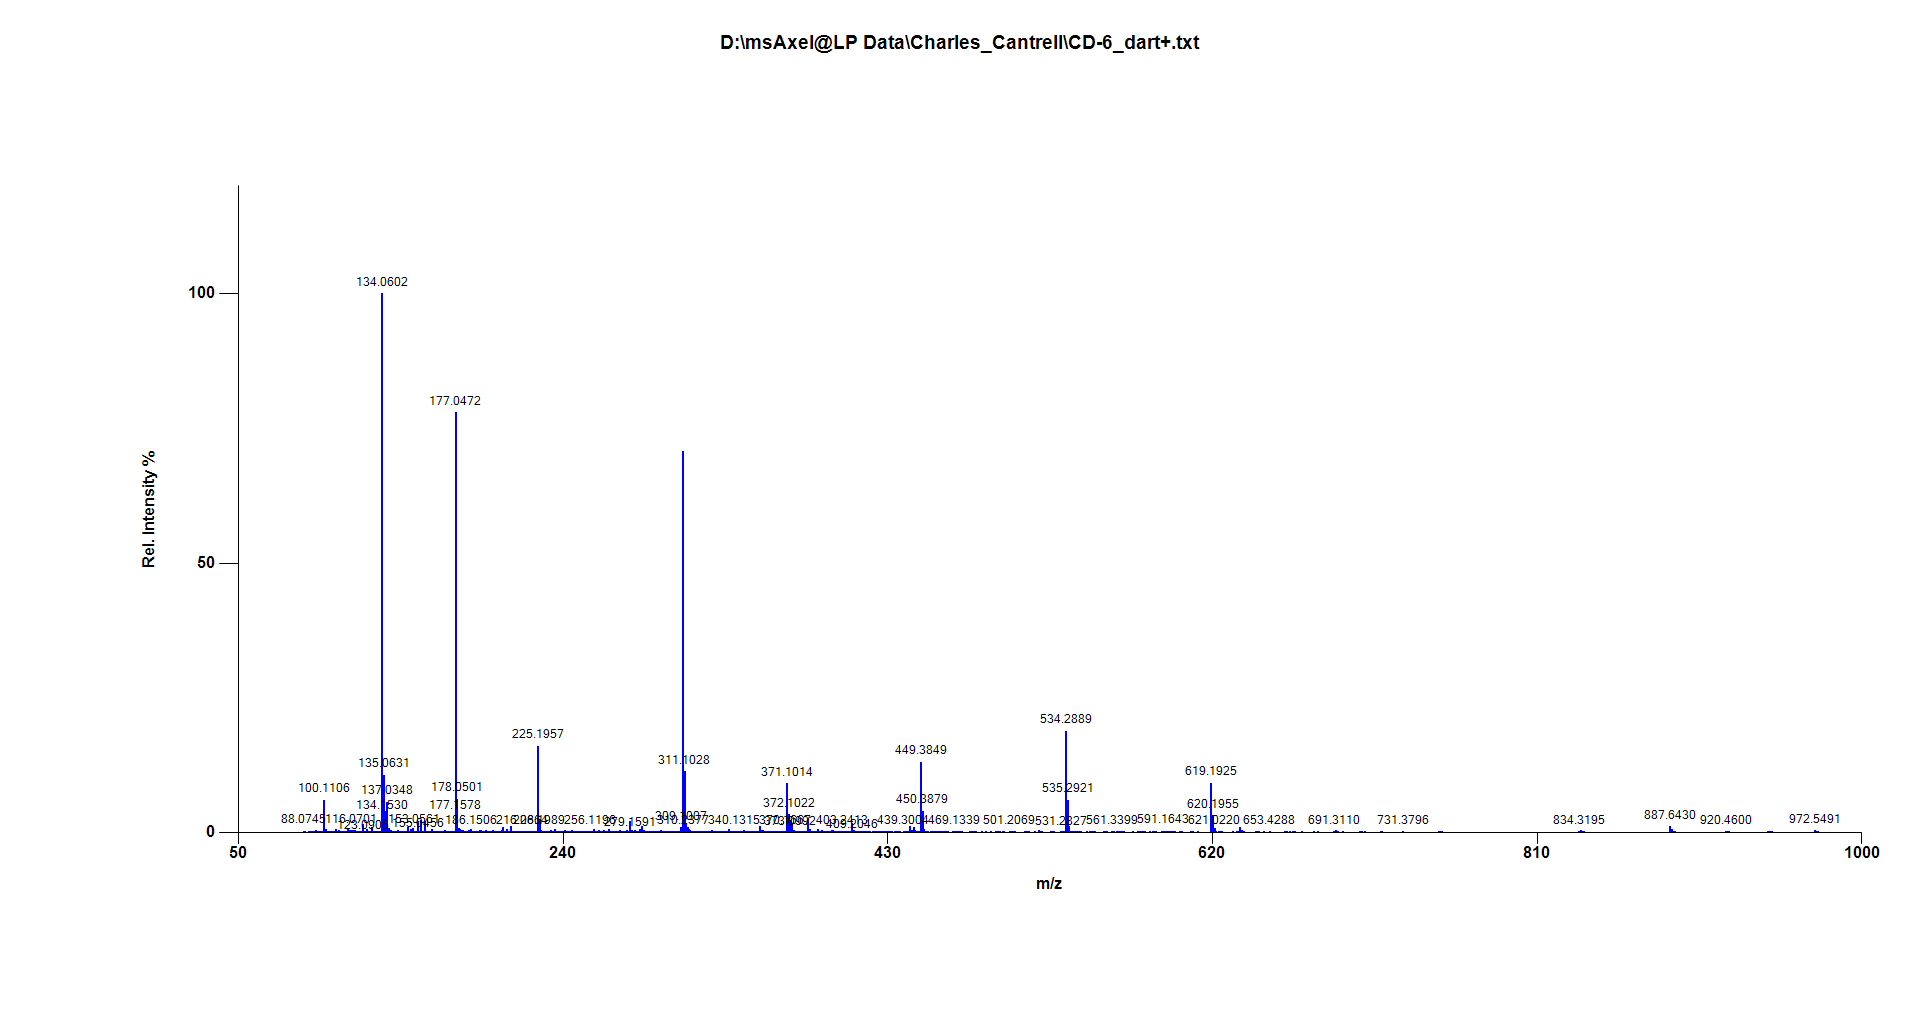


The HRMS of compound 5f

**
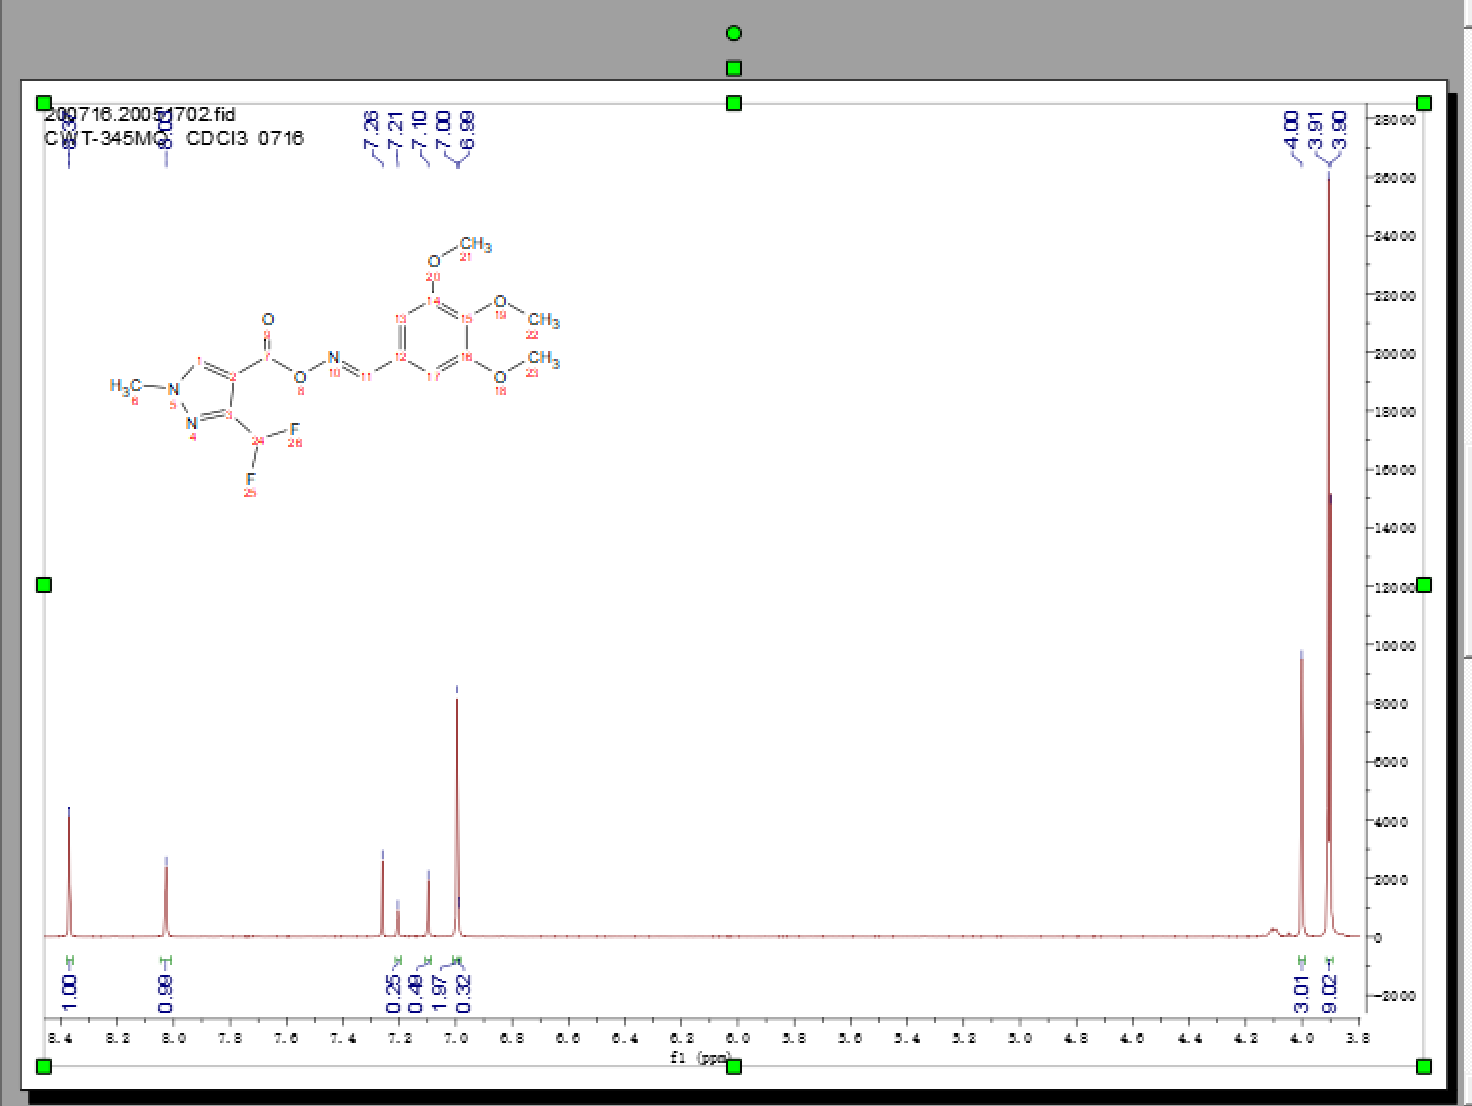
**

The 1H NMR of compound 5g


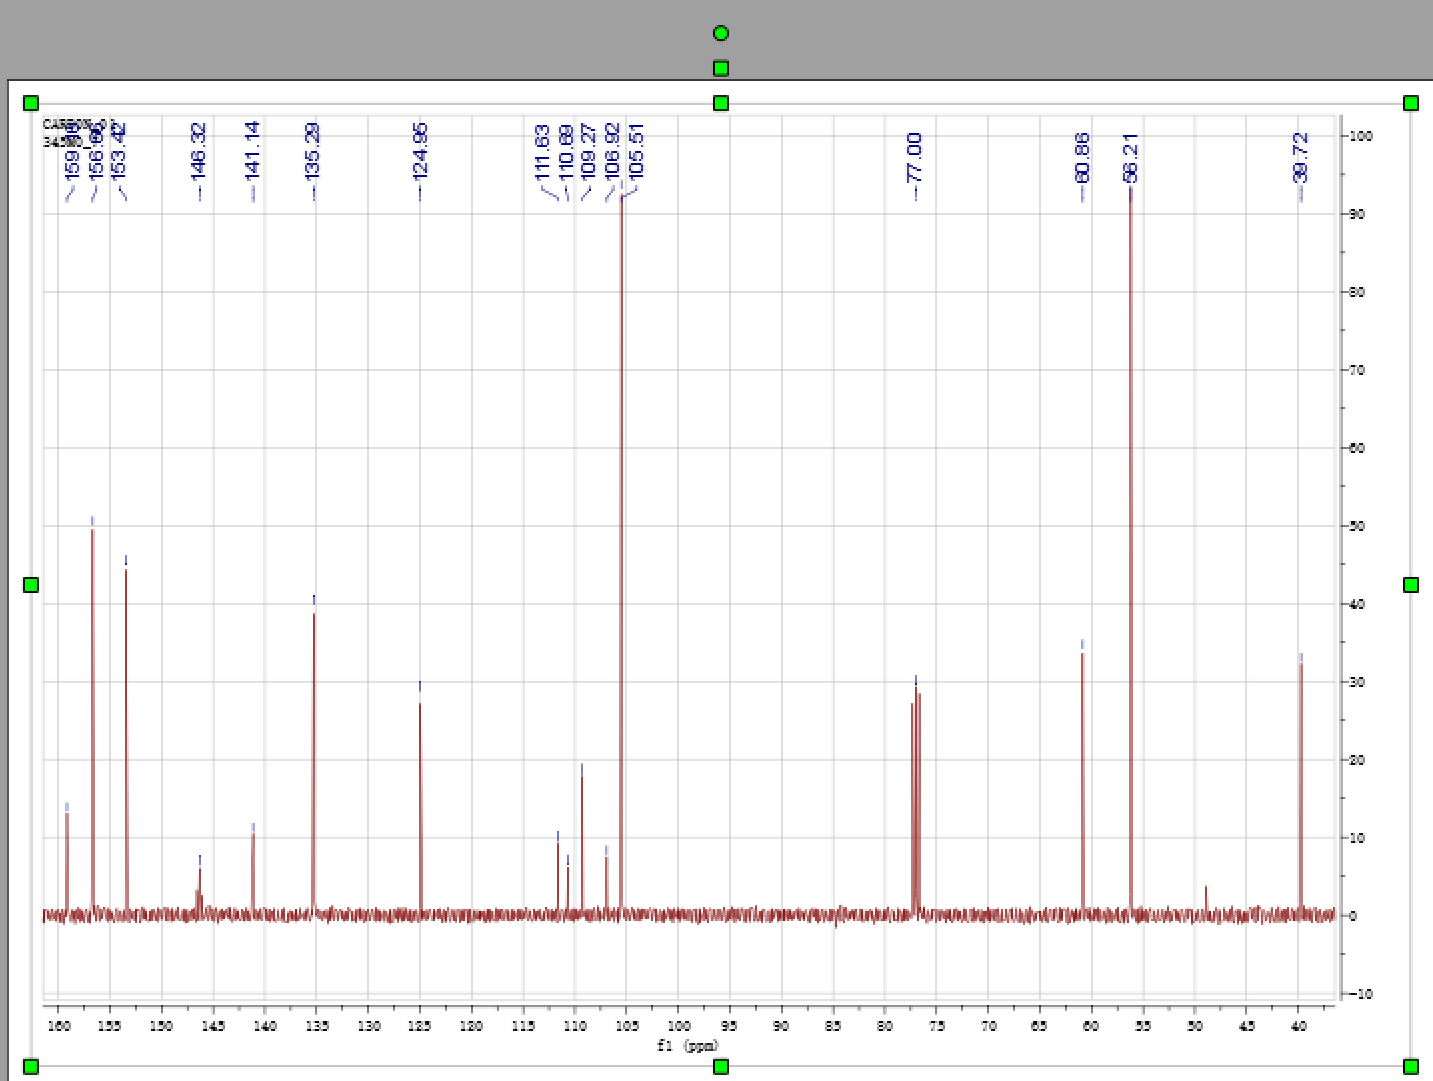


The 13C NMR of compound 5g


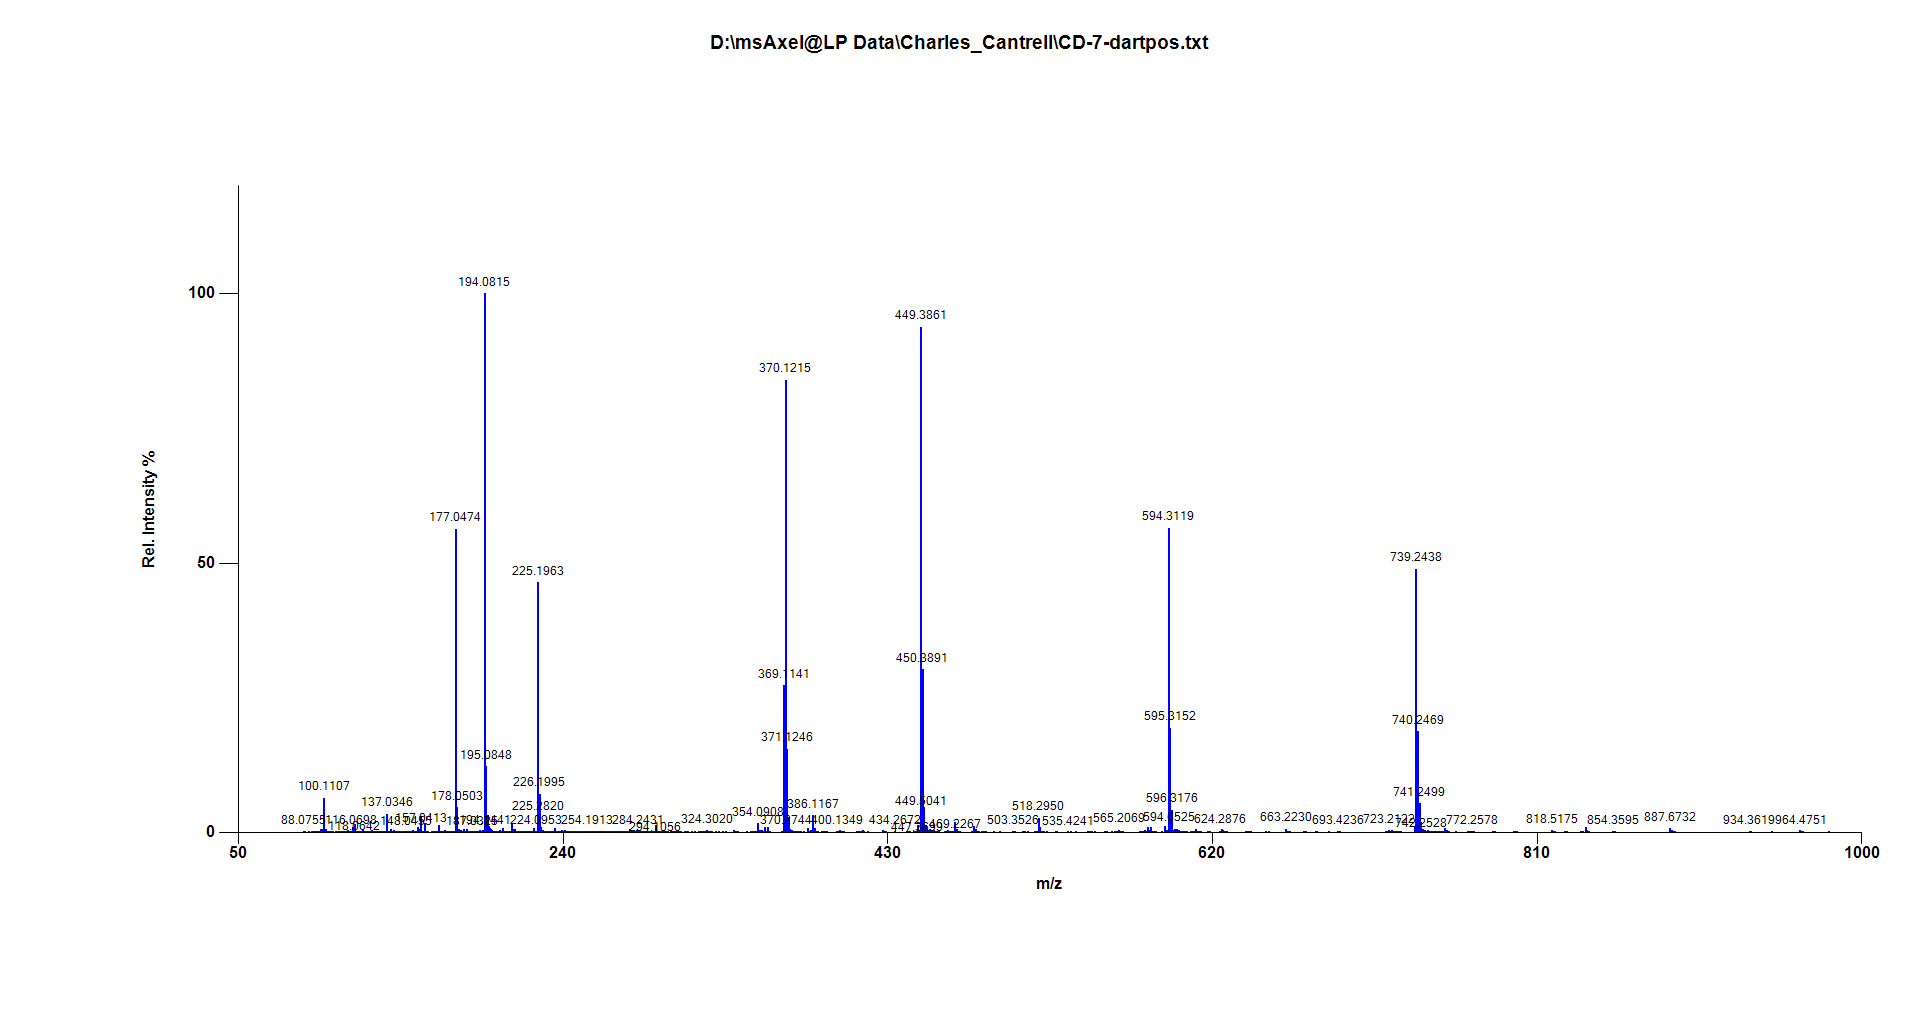


The HRMS of compound 5g

**
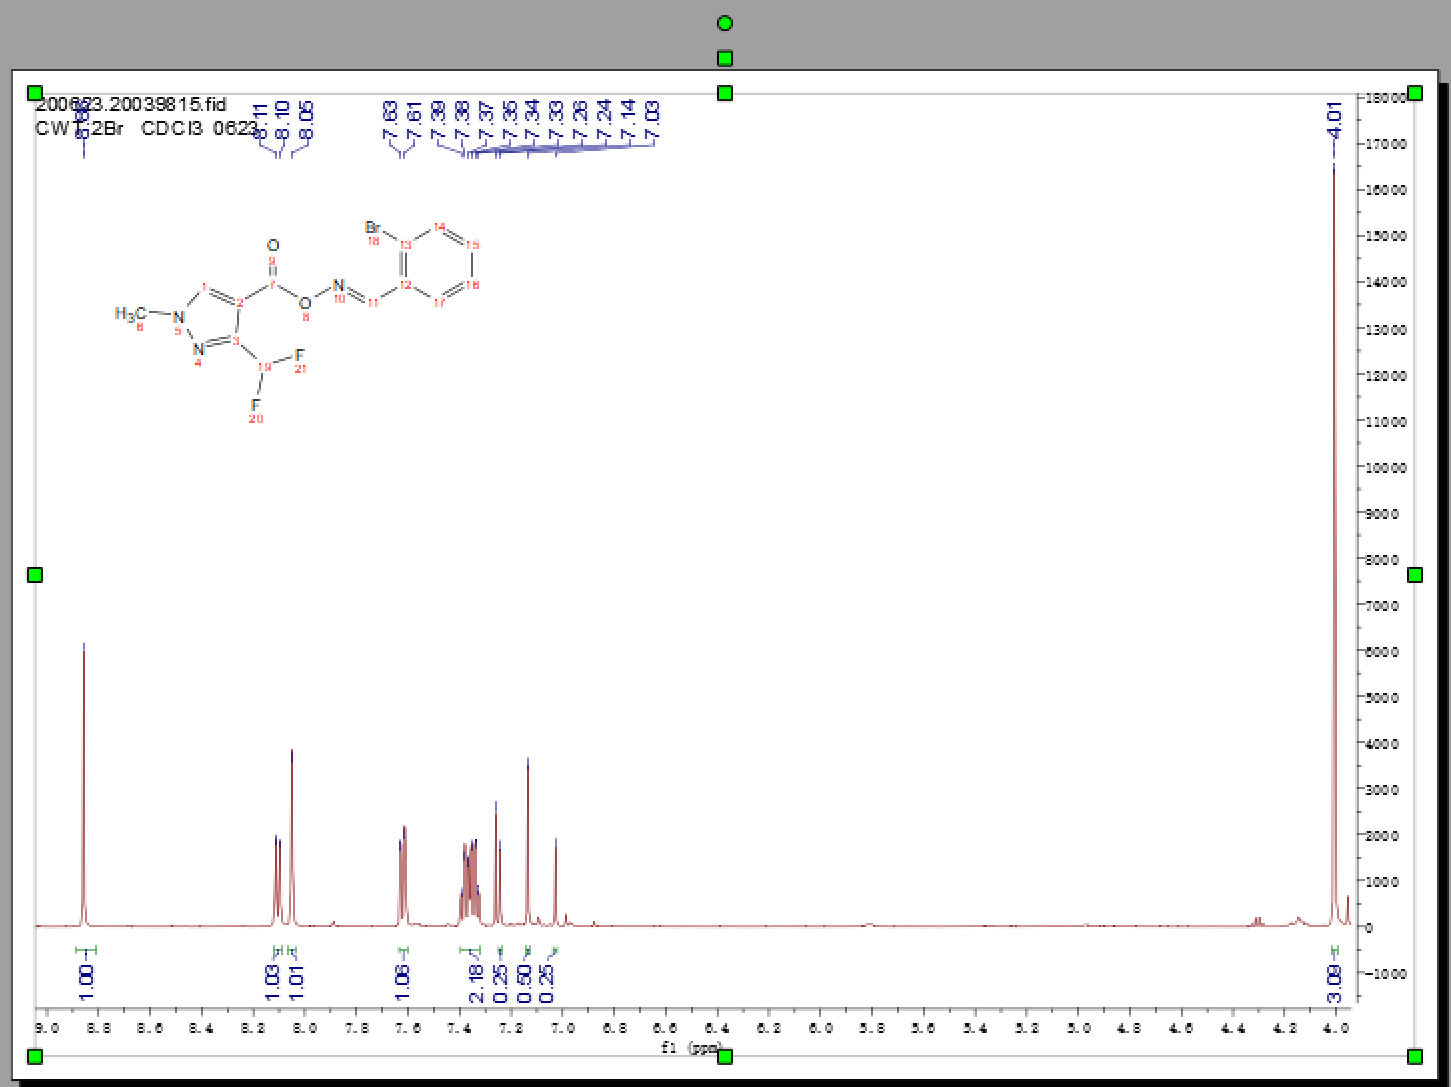
**

The 1H NMR of compound 5h


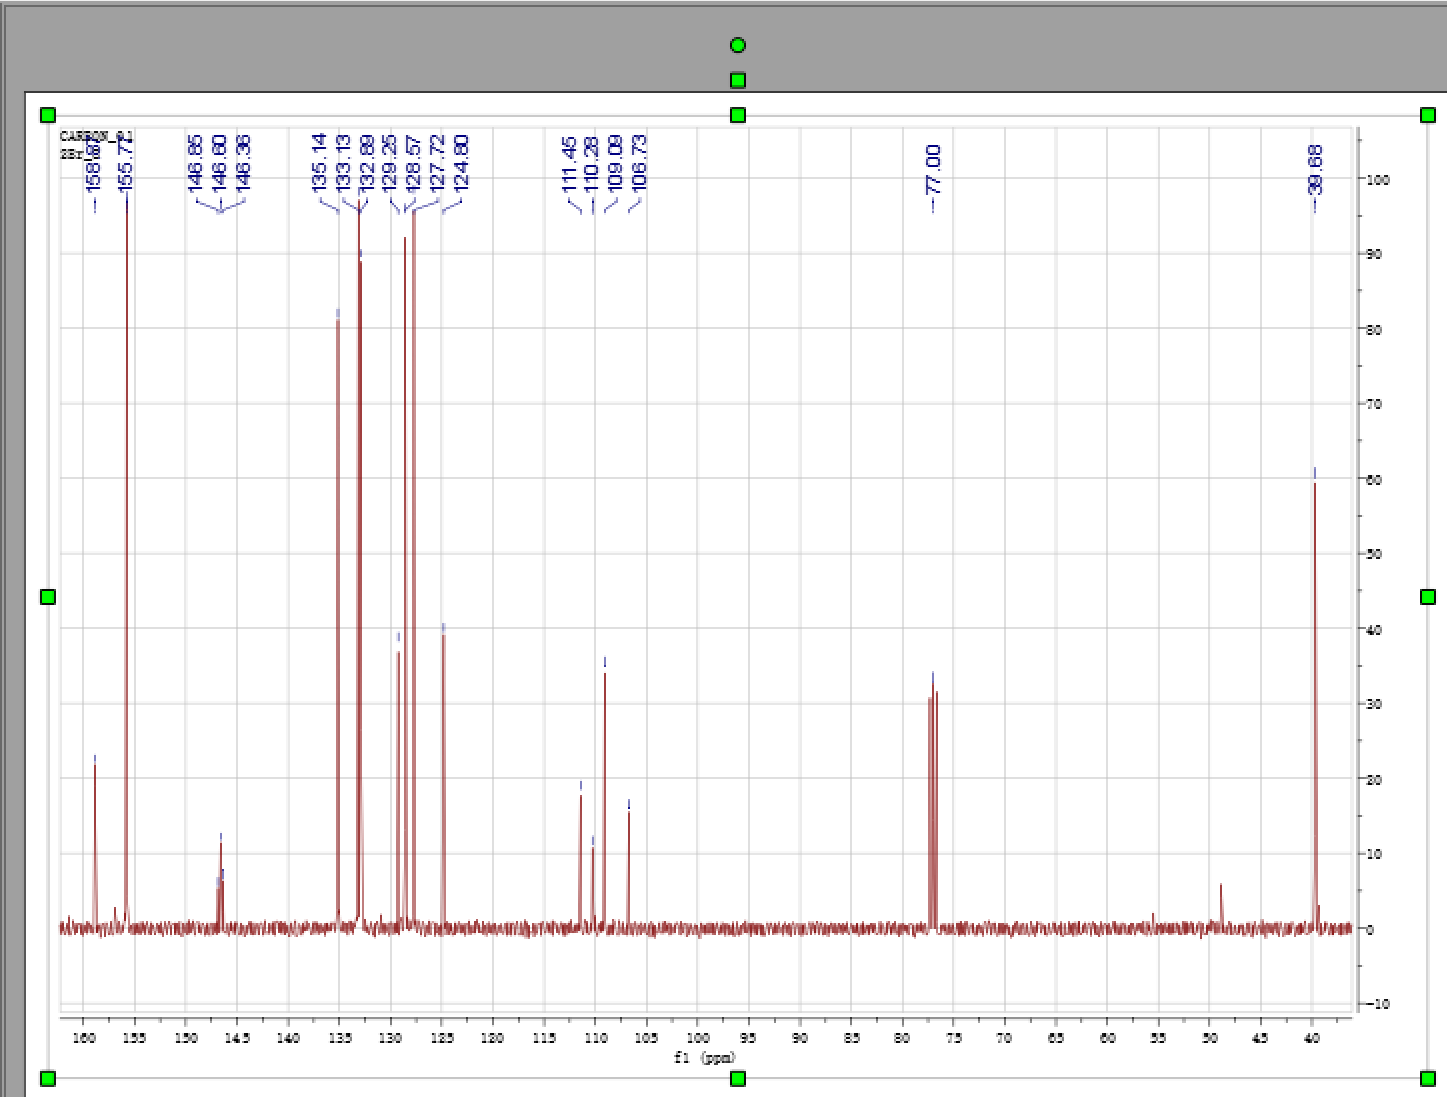


The 13C NMR of compound 5h


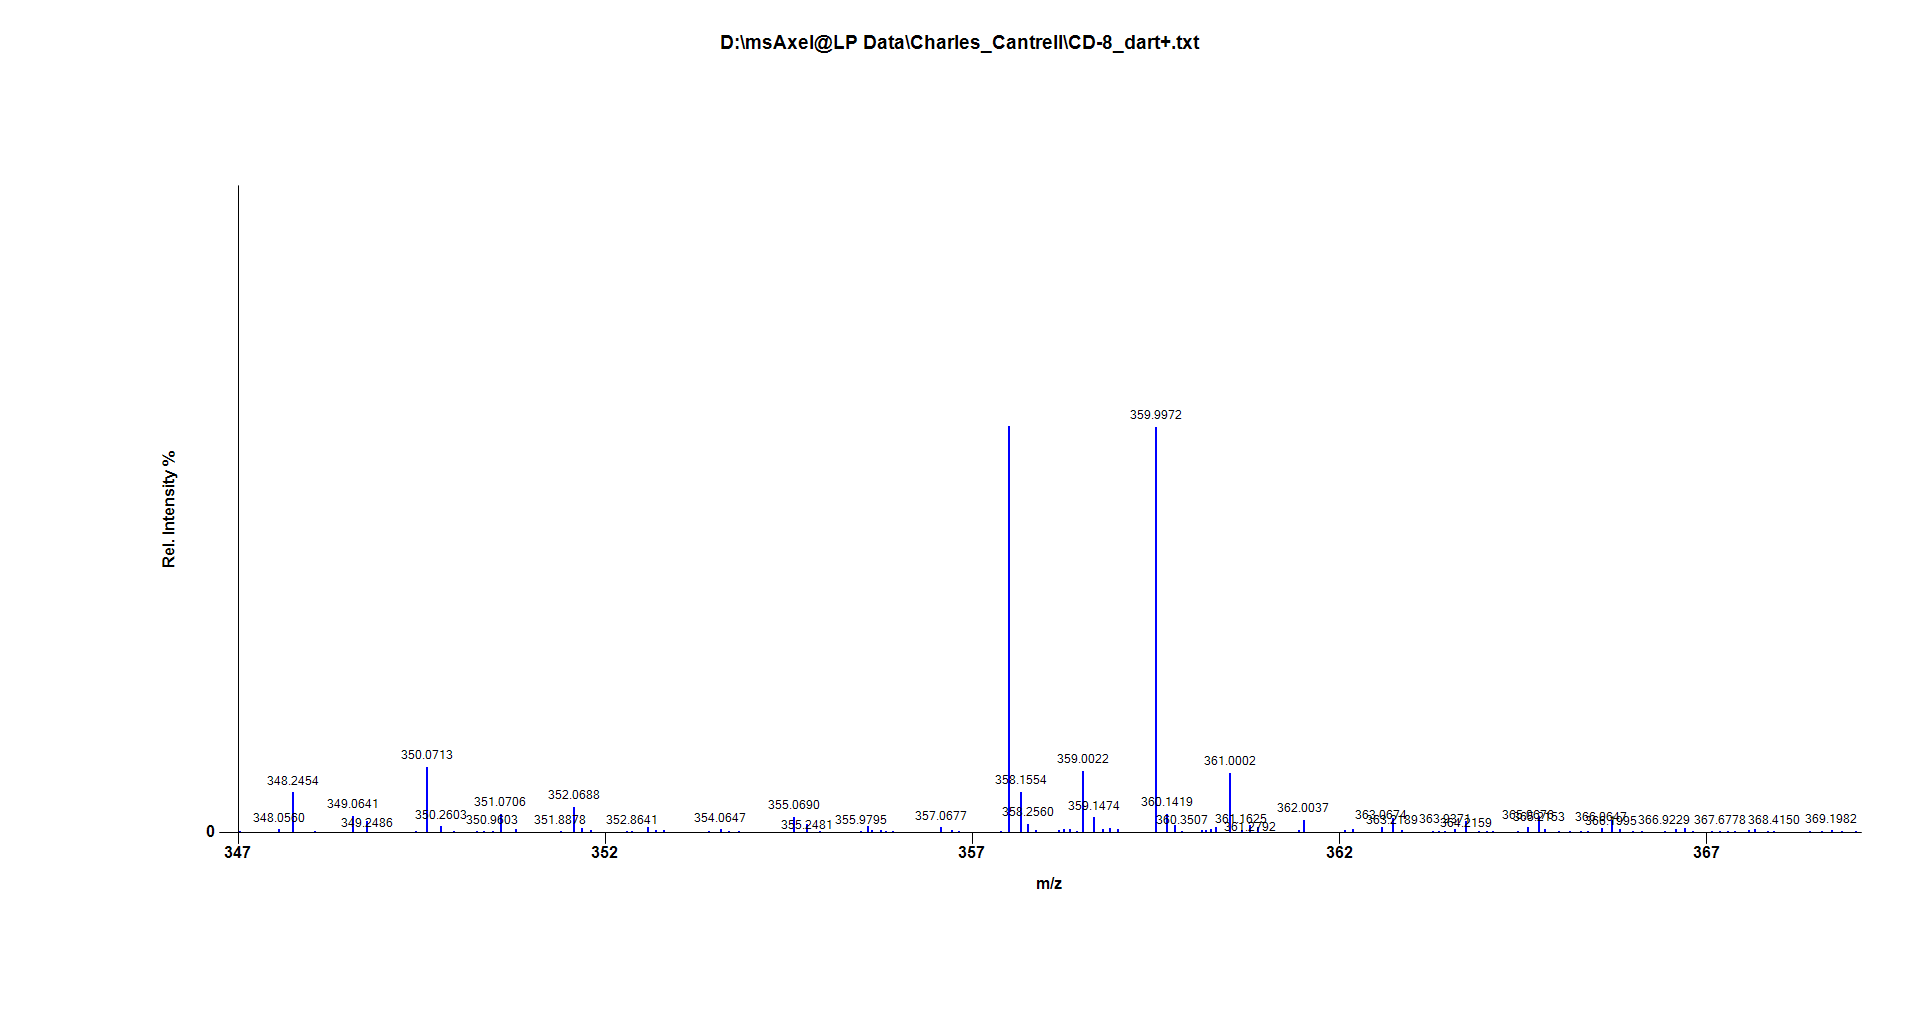


The HRMS of compound 5h

**
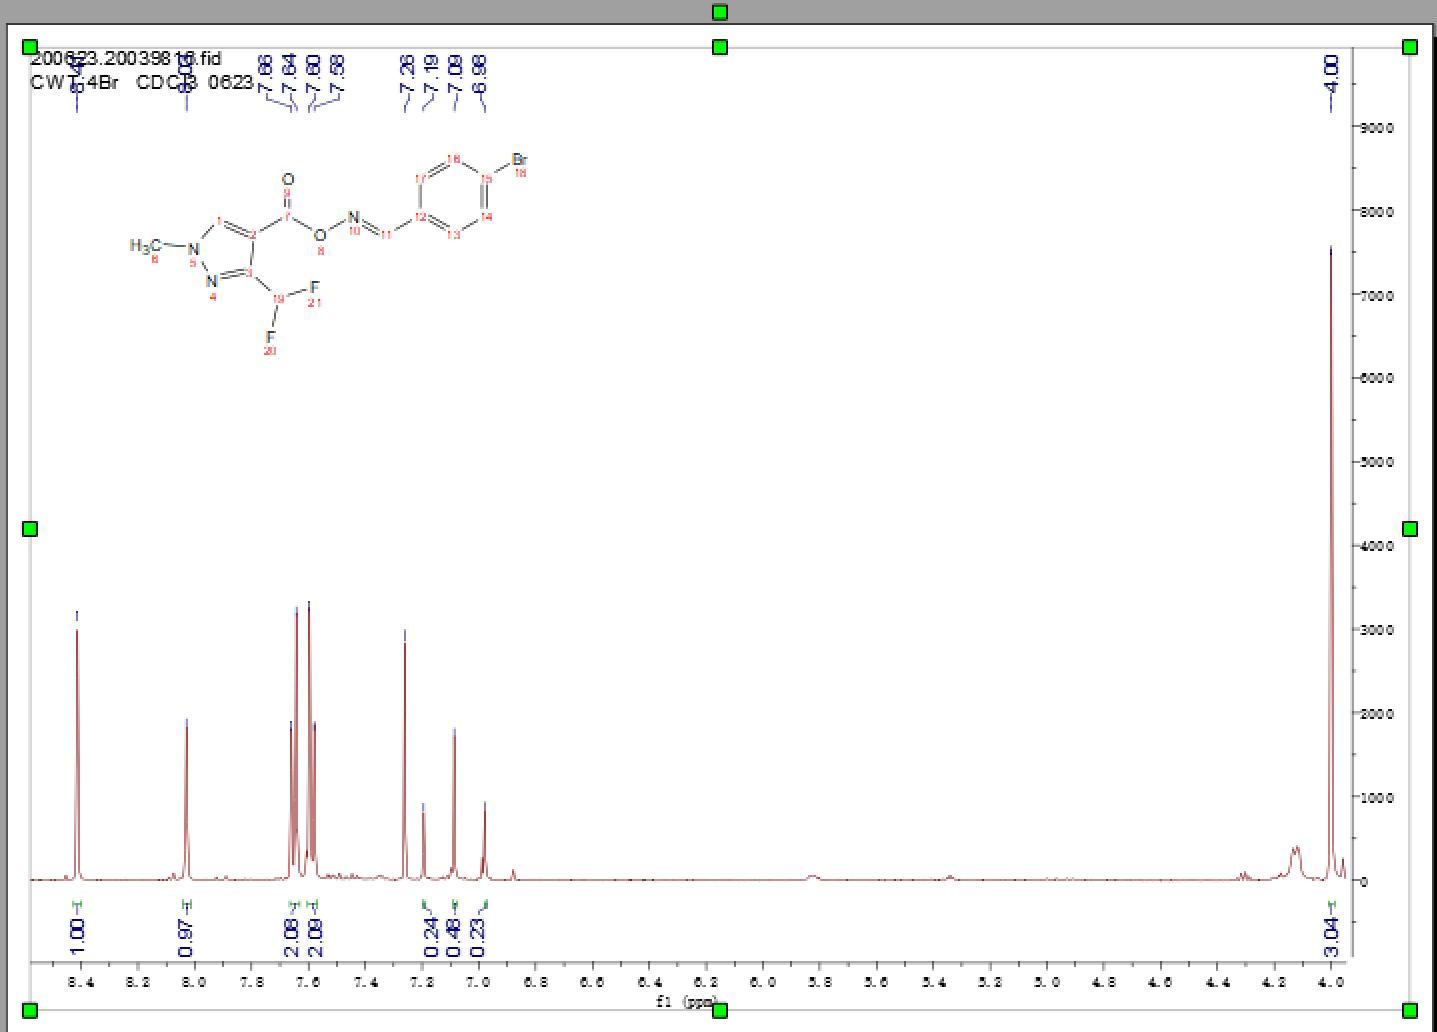
**

The 1H NMR of compound 5i

**
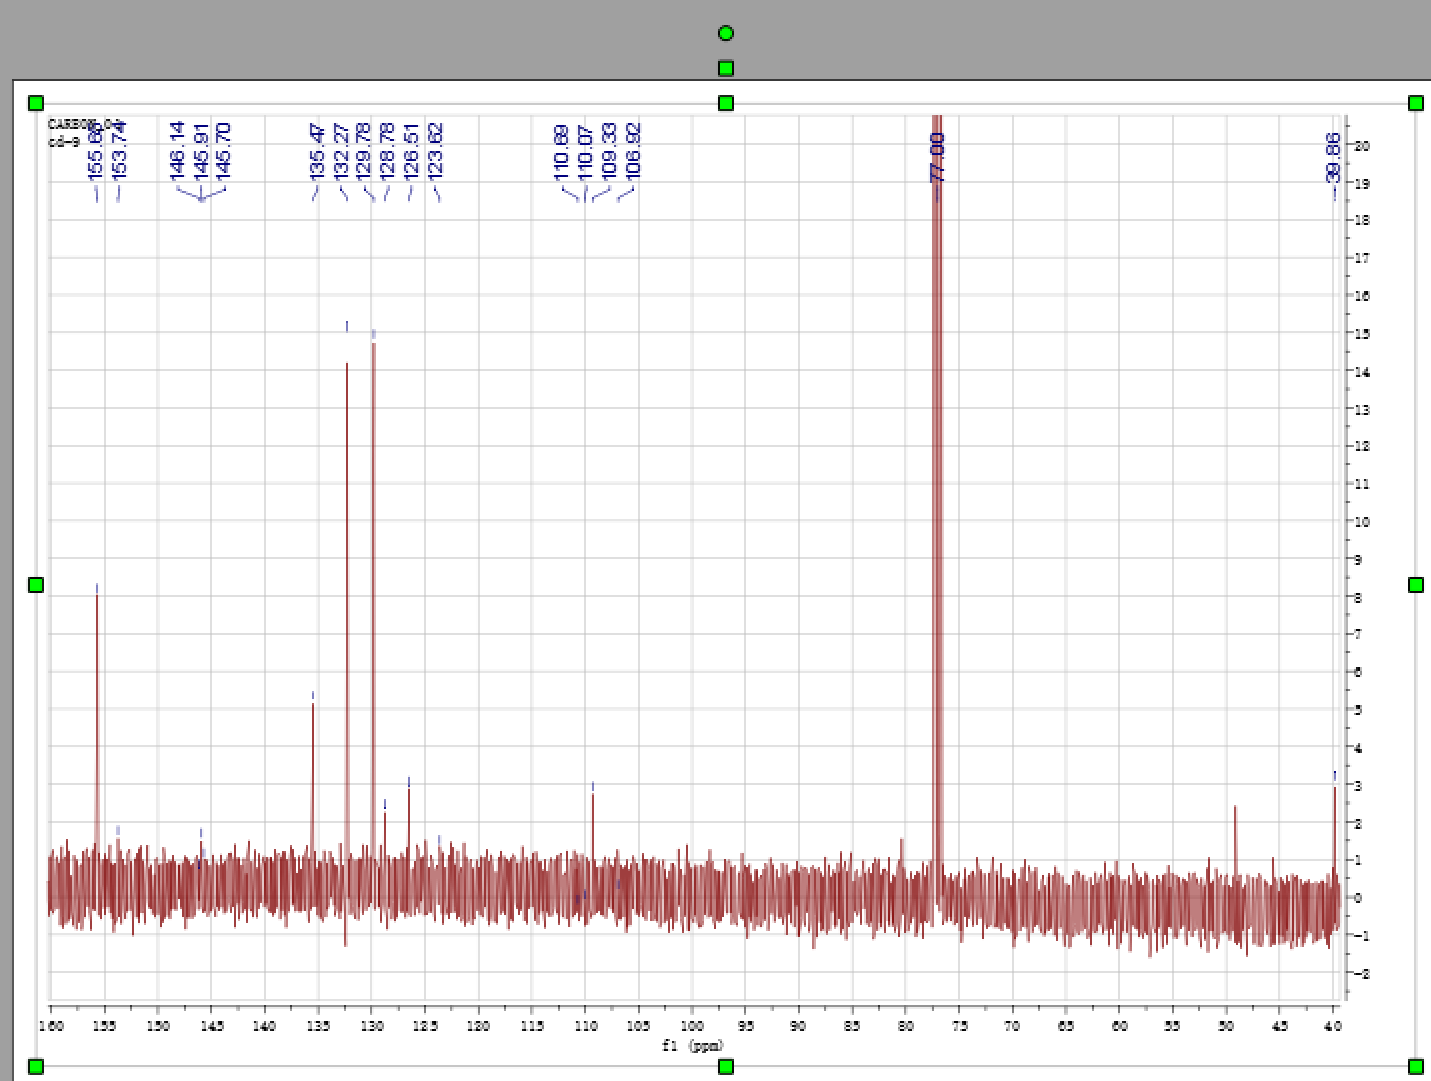
**

The13C NMR of compound 5i


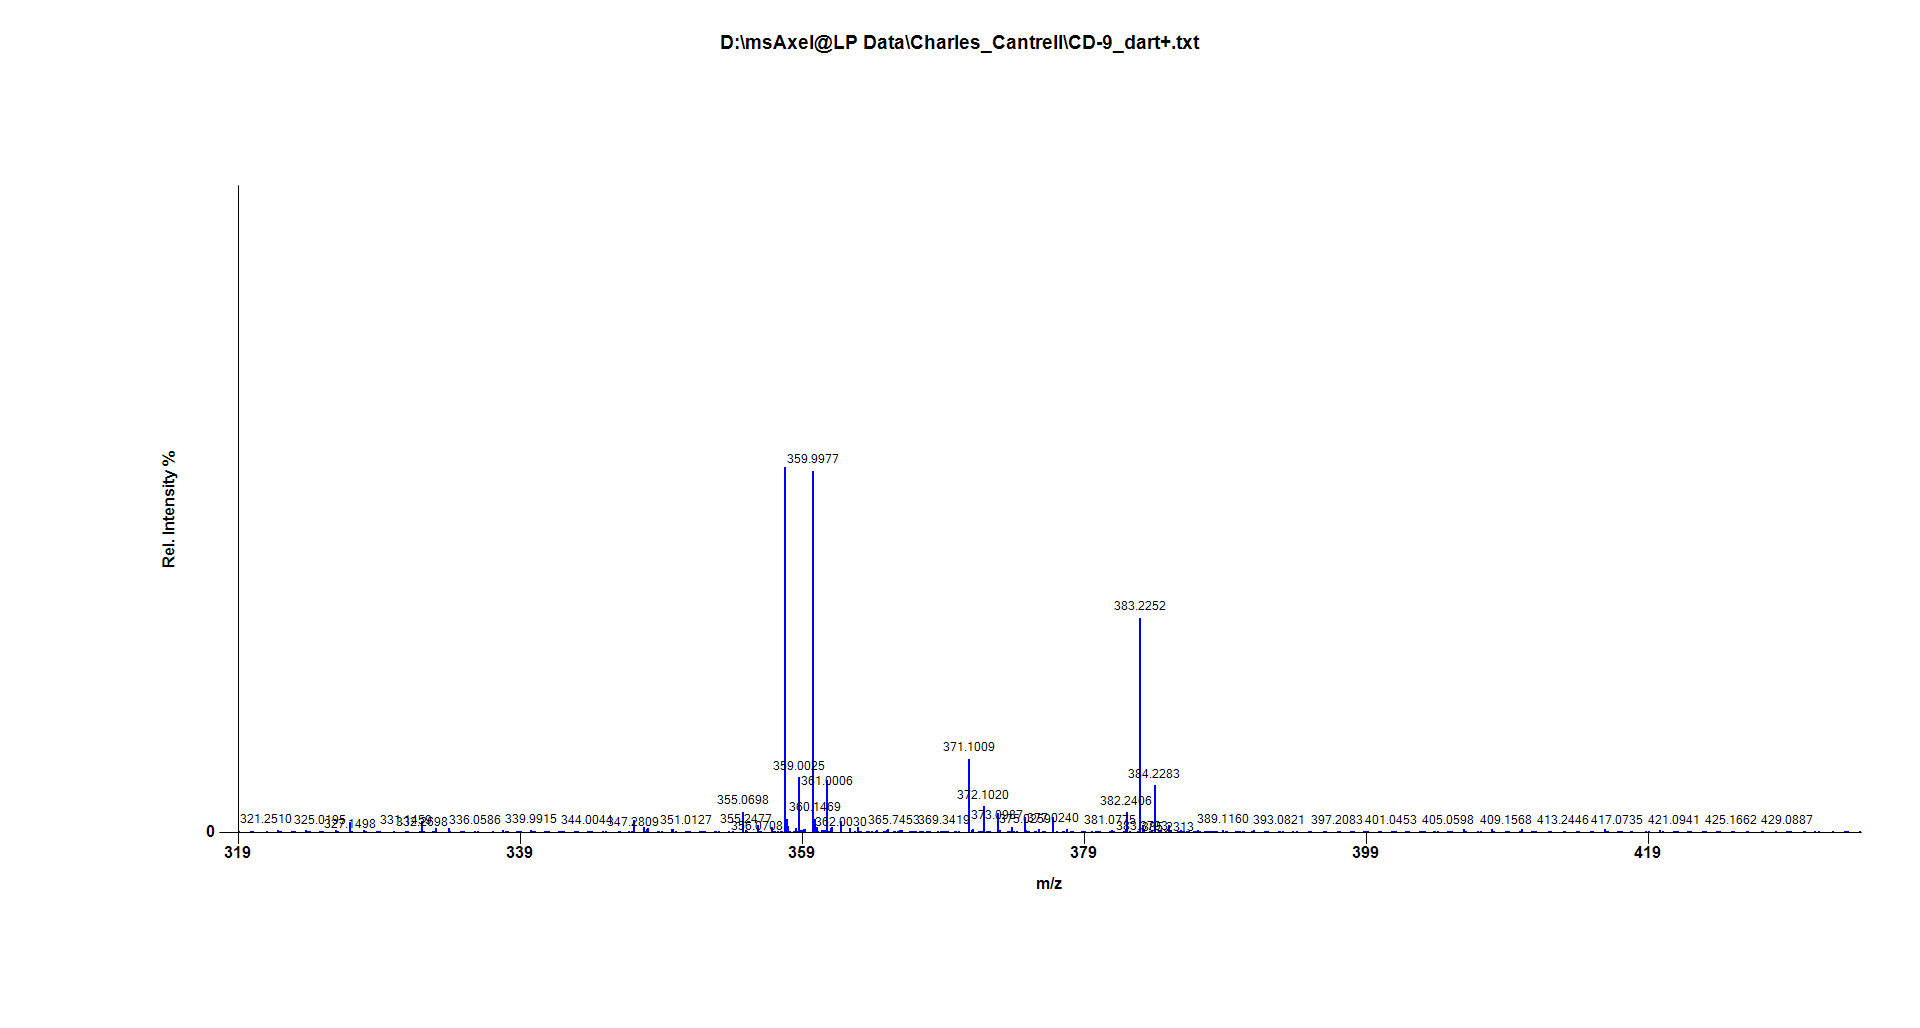


The HRMS of compound 5i

**
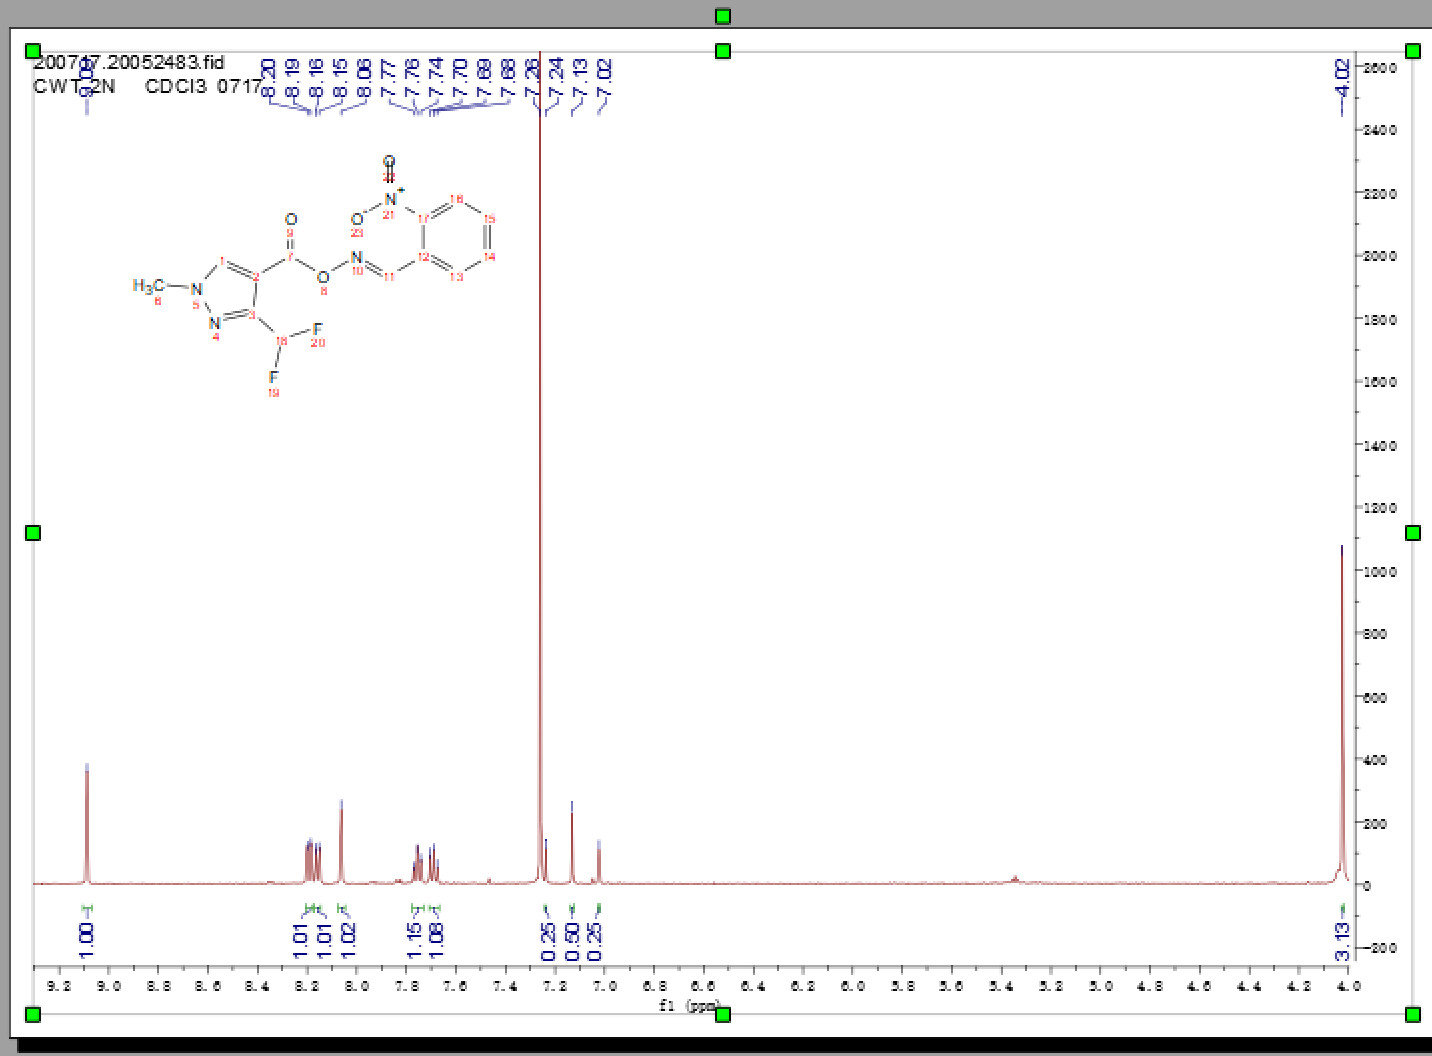
**

The 1H NMR of compound 5j


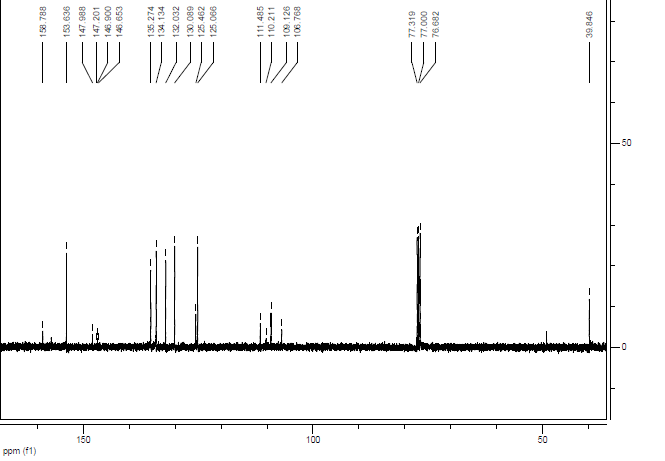


The 13C NMR of compound 5j


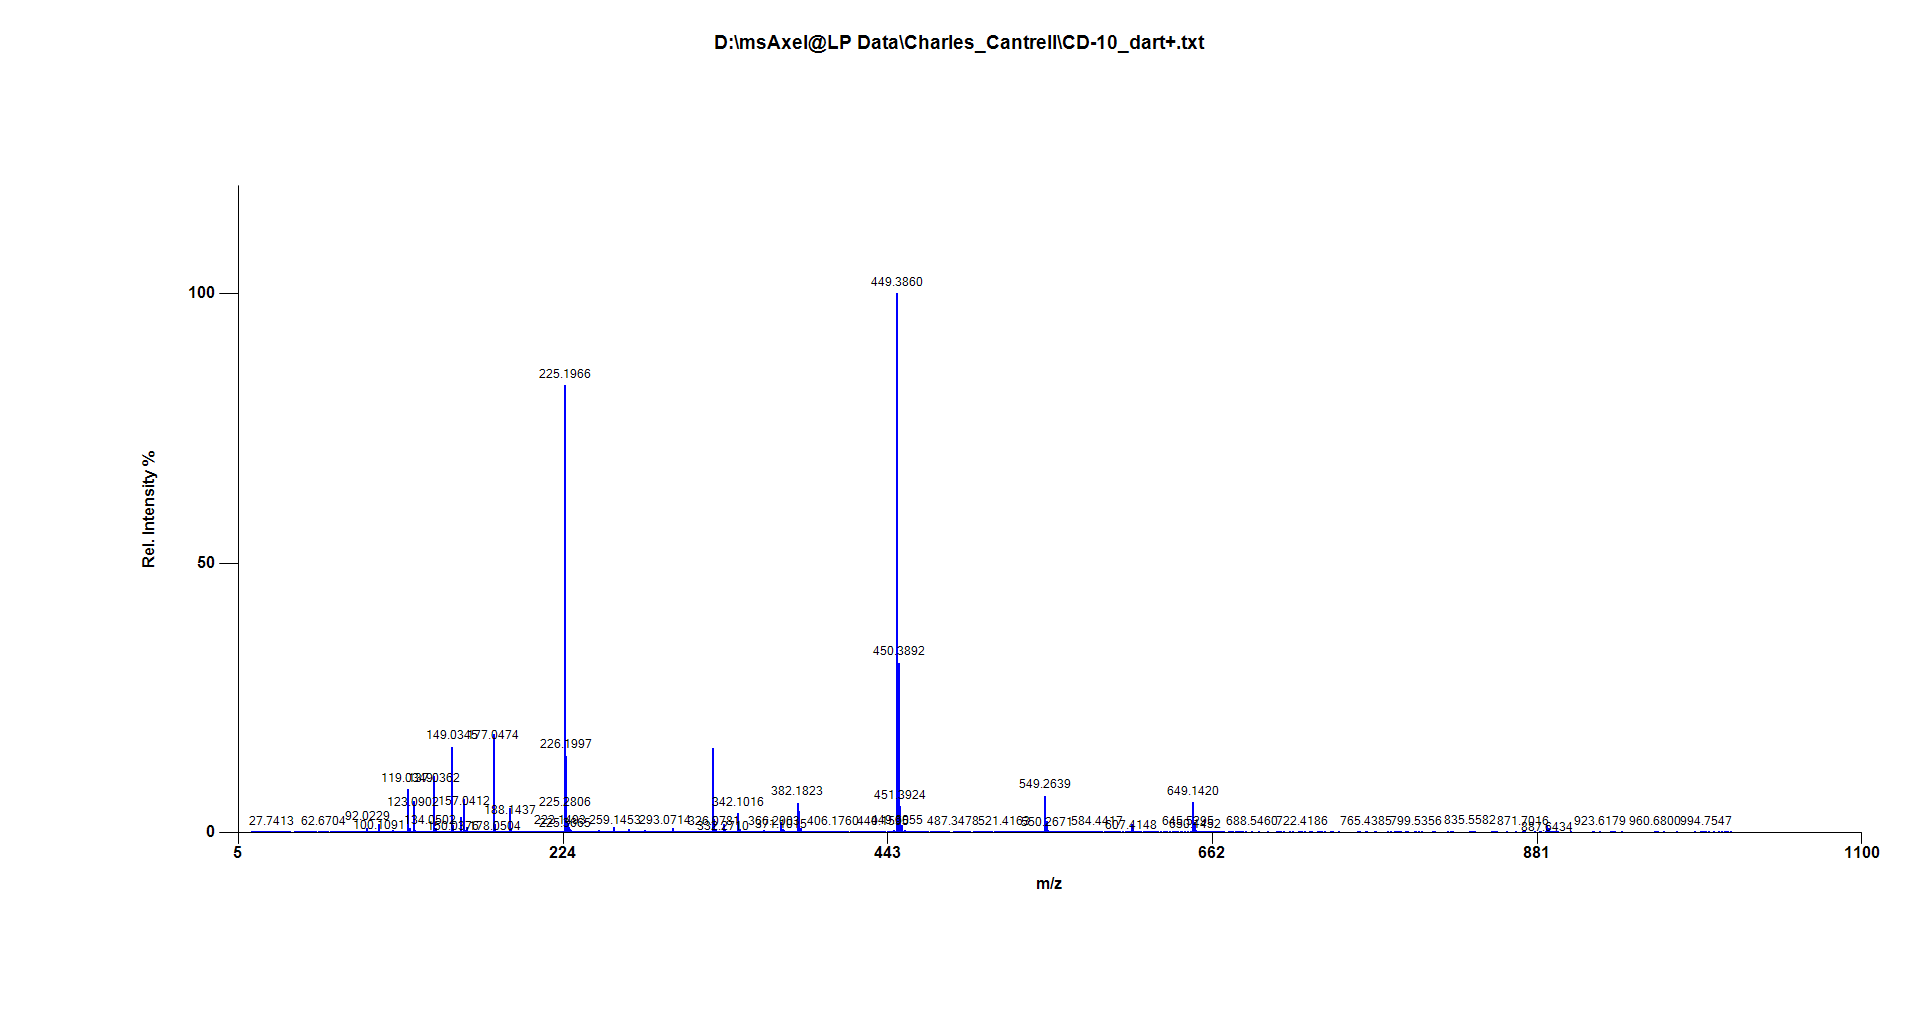


The HRMS of compound 5j

**
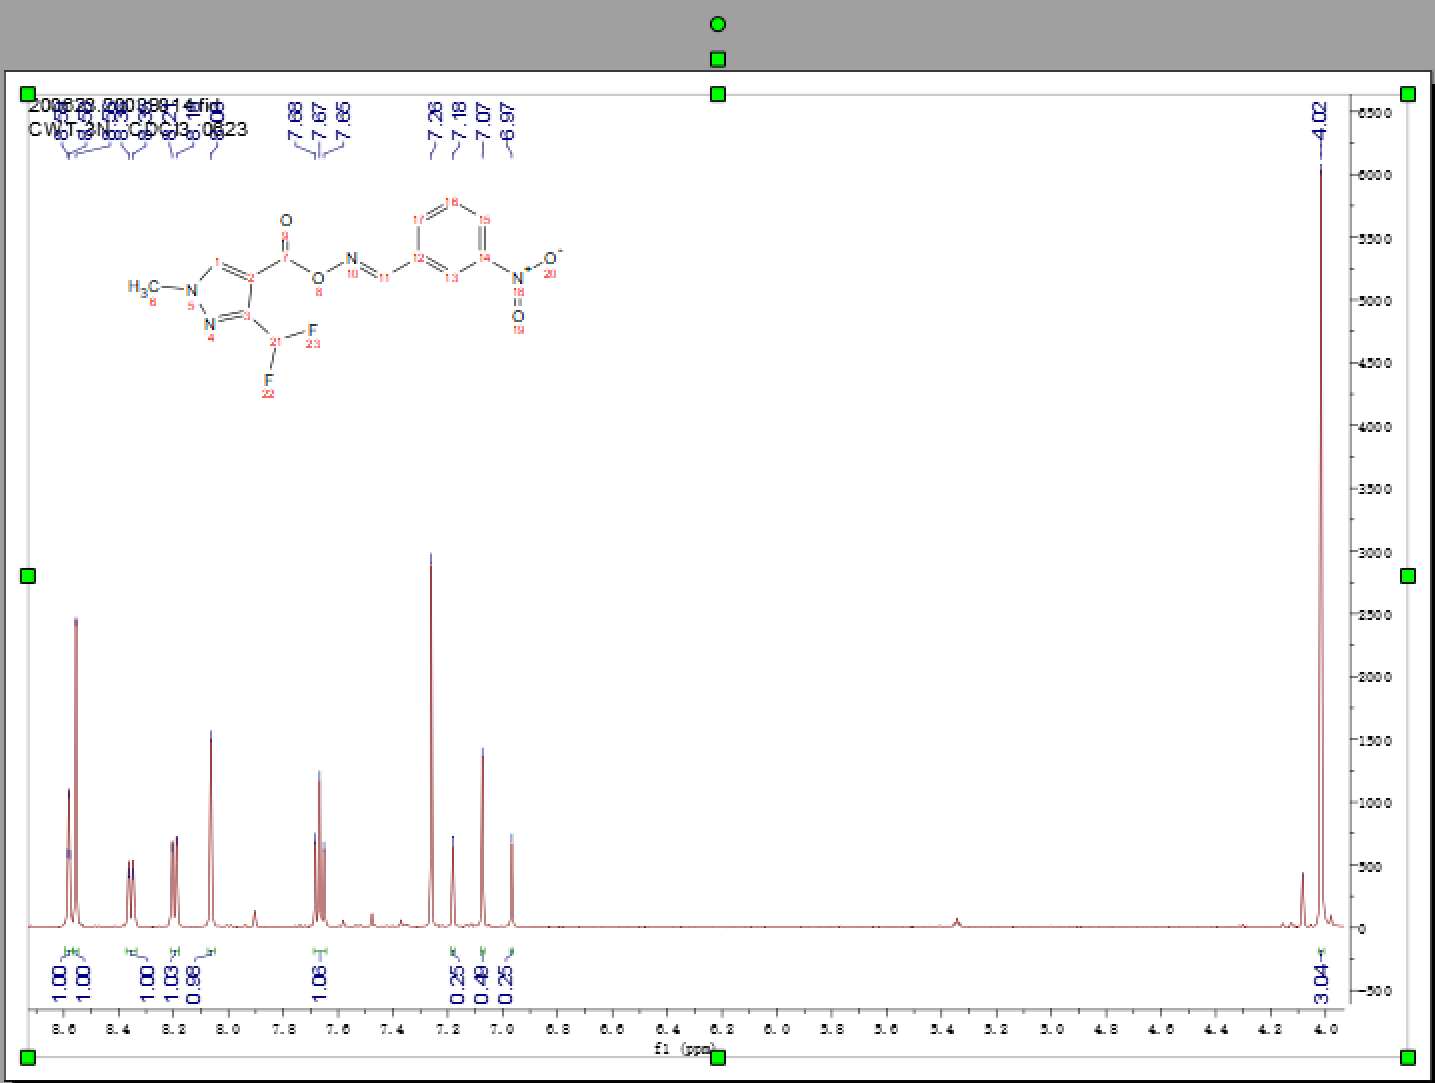
**

The 1H NMR of compound 5k


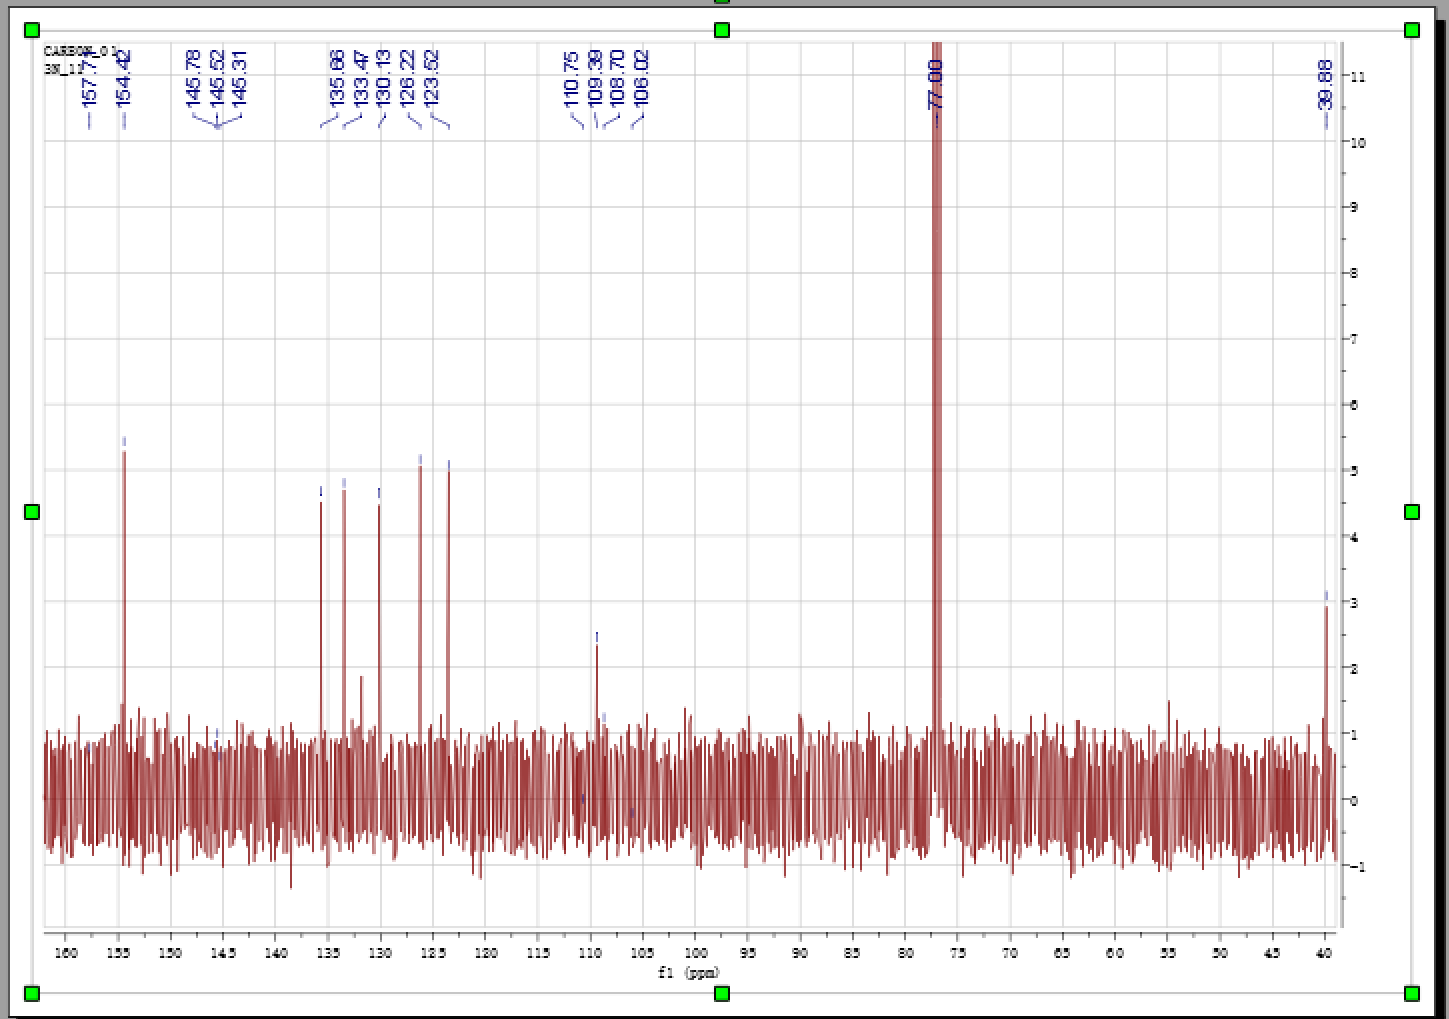
The 13C NMR of compound 5k


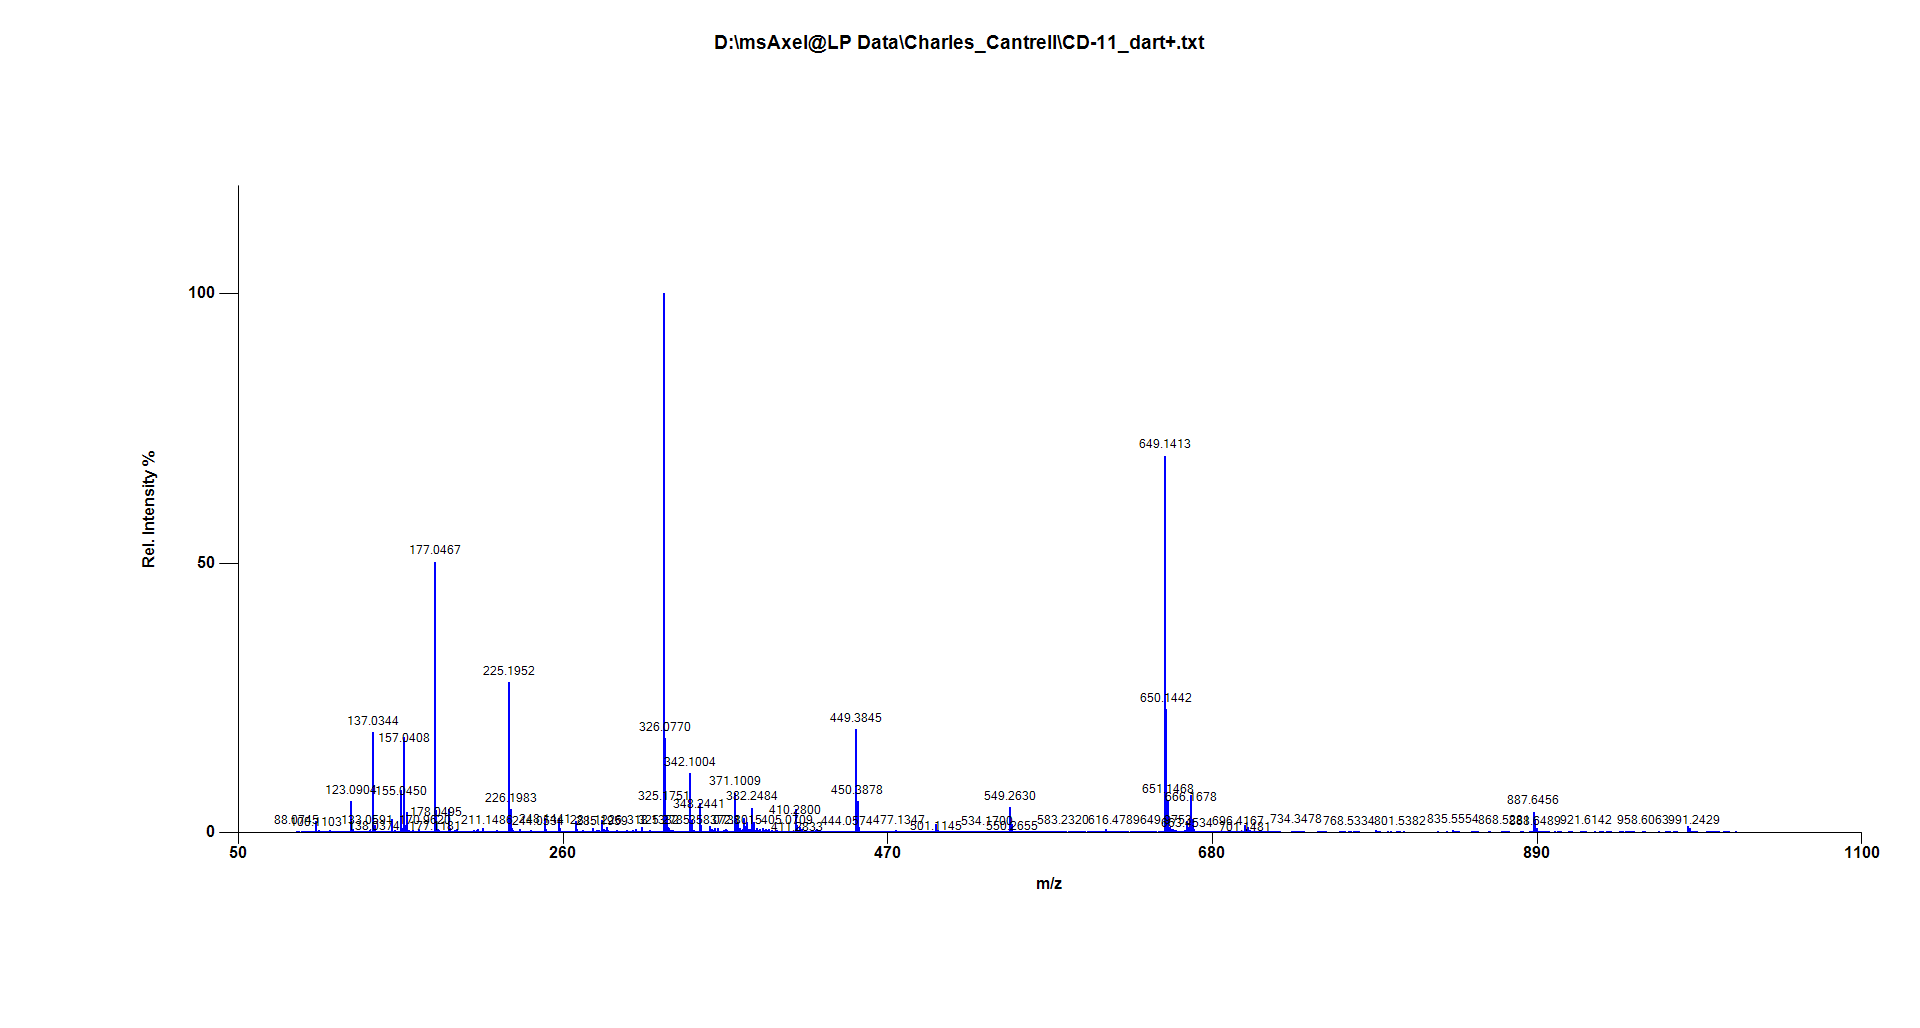


The HRMS of compound 5k

**
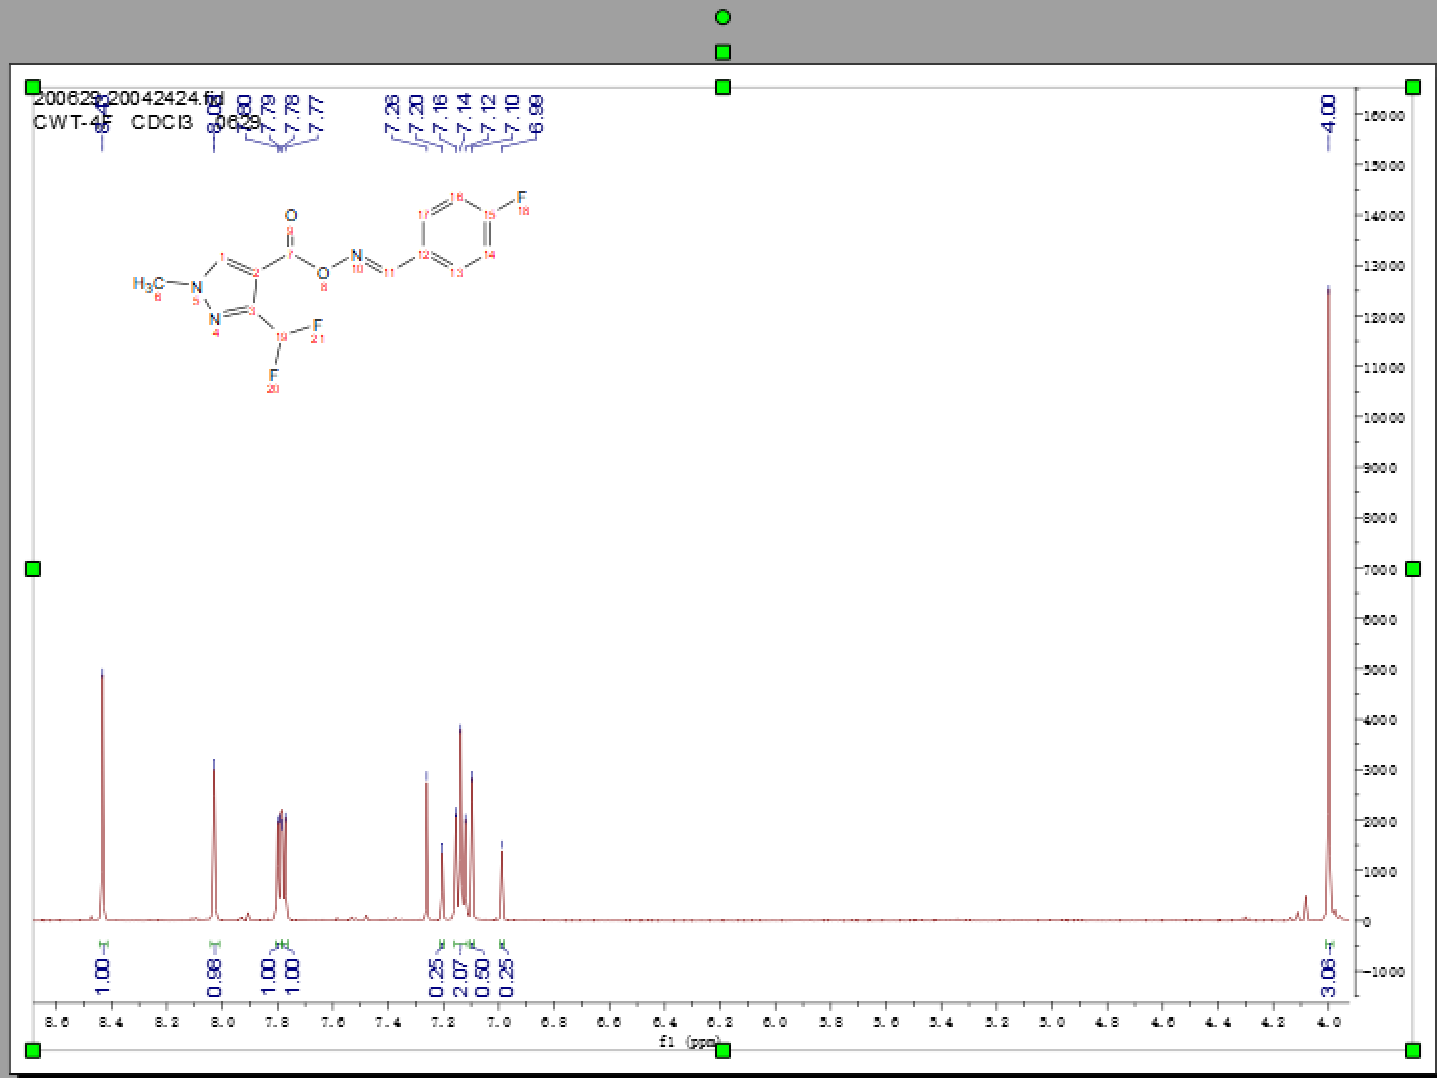
**

The 1H NMR of compound 5l


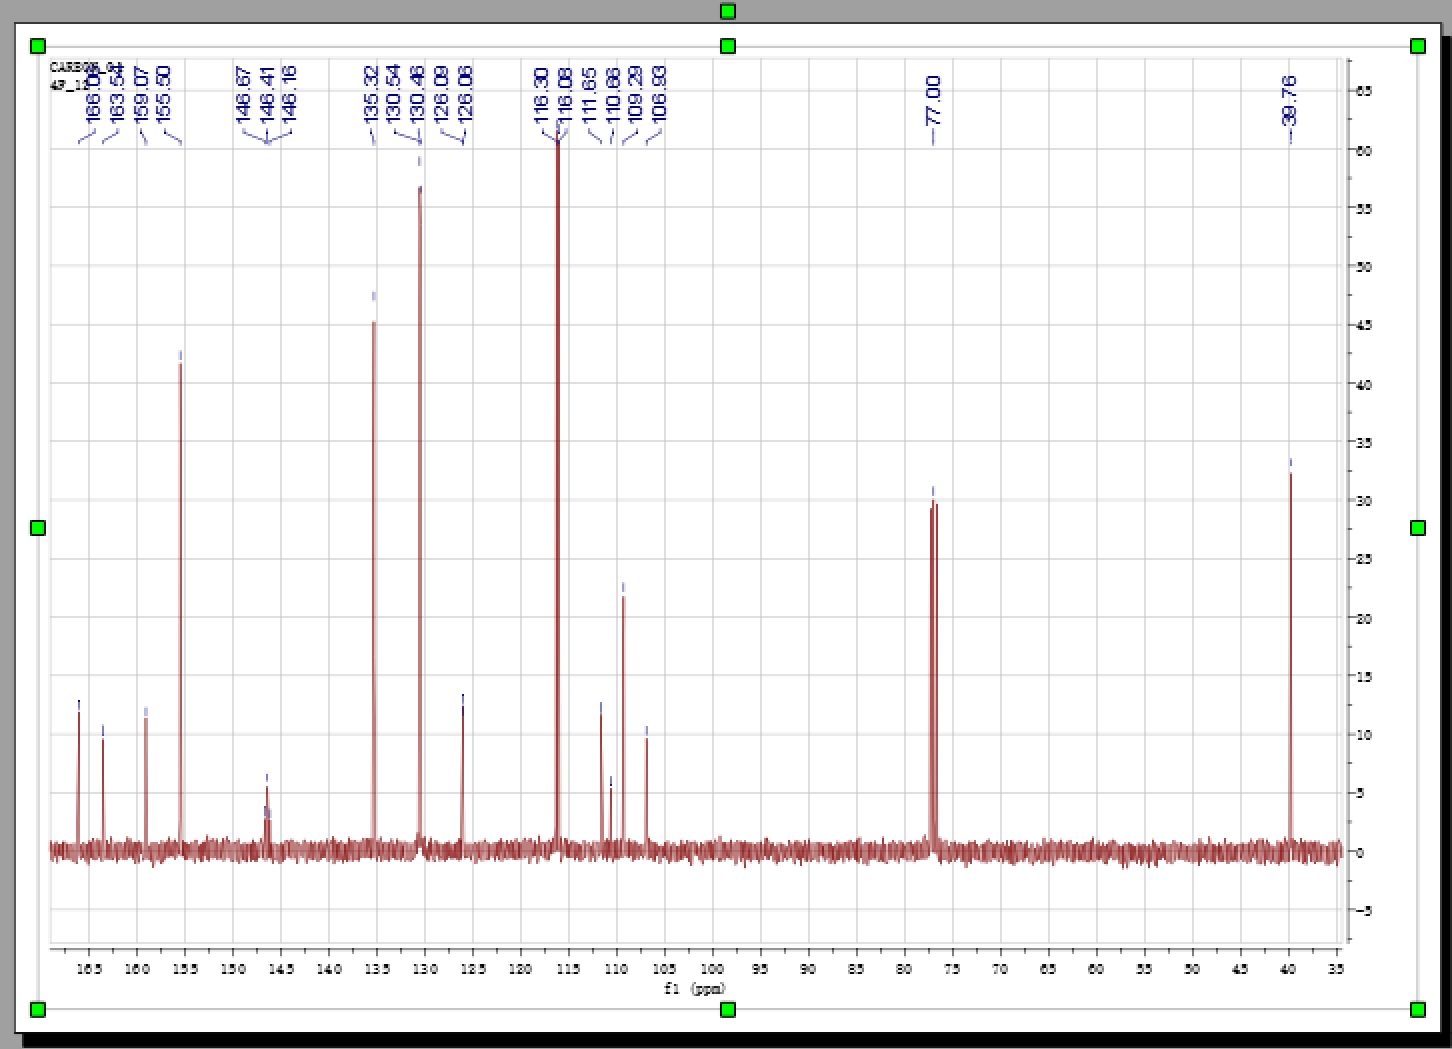


The 13C NMR of compound 5l


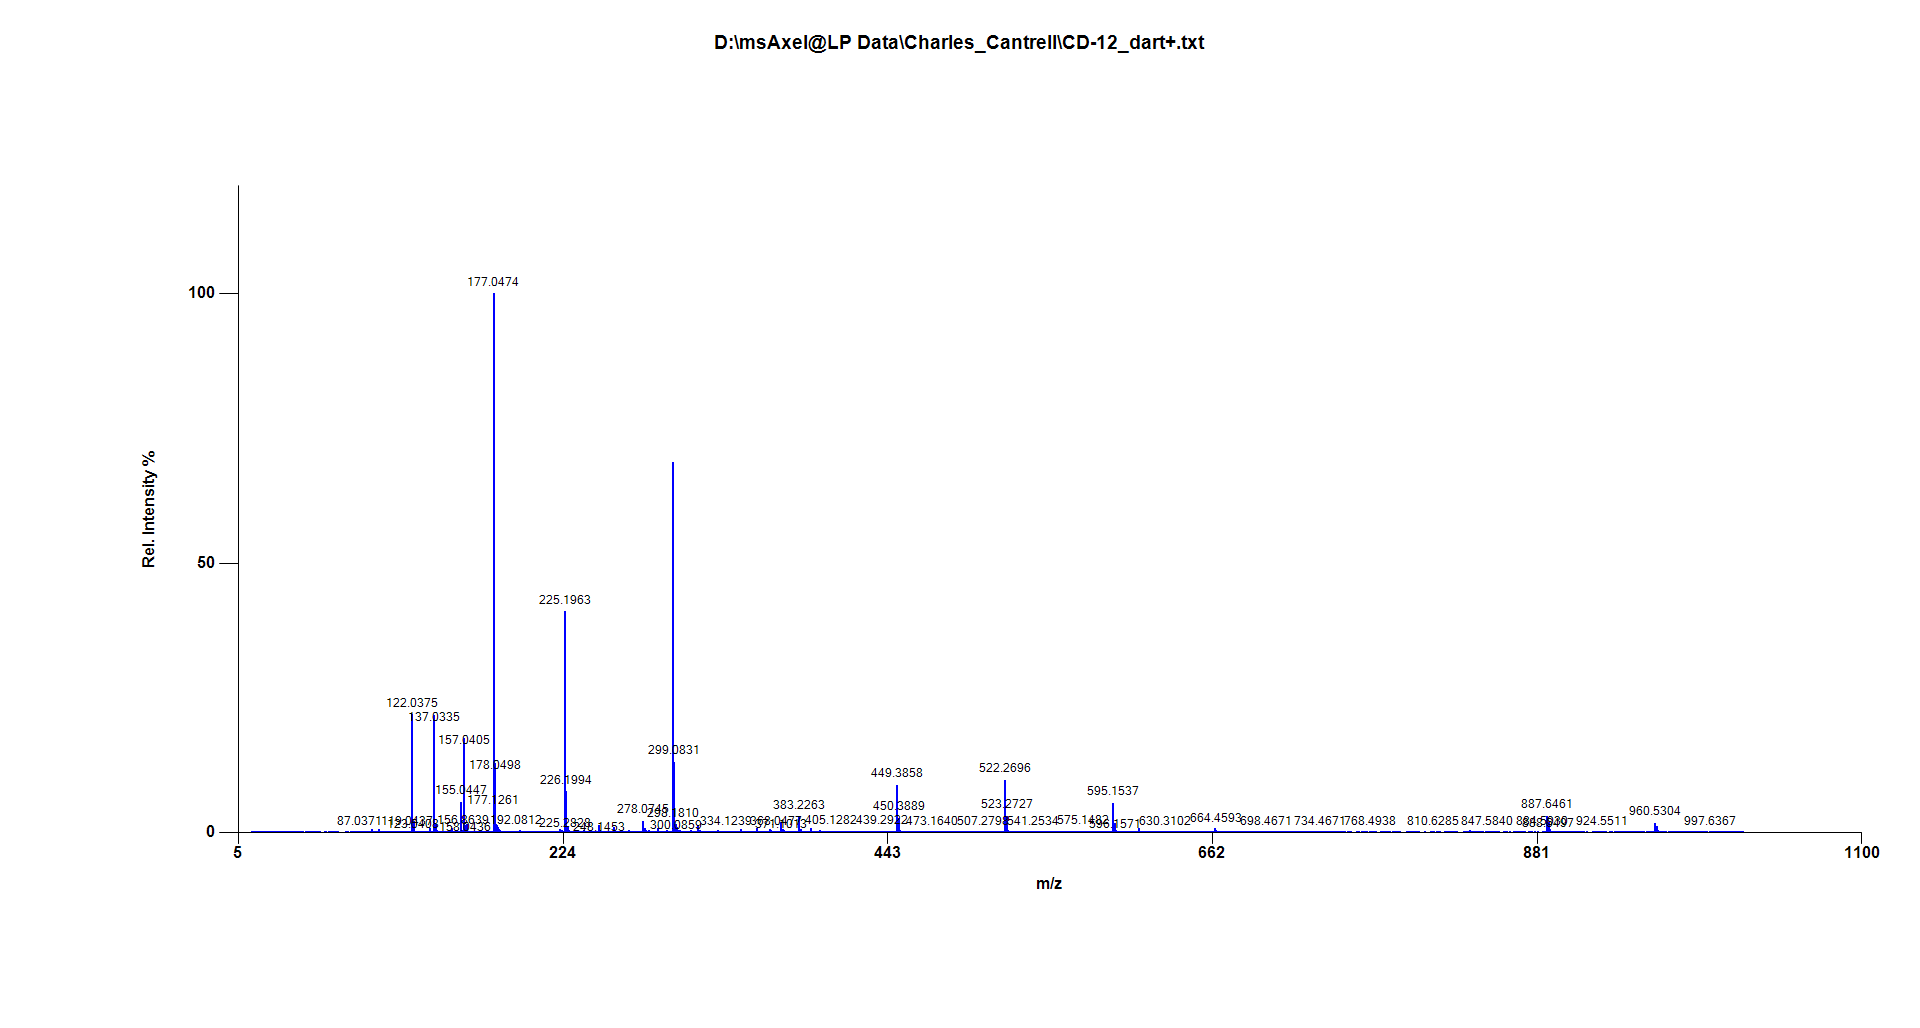


The HRMS of compound 5l


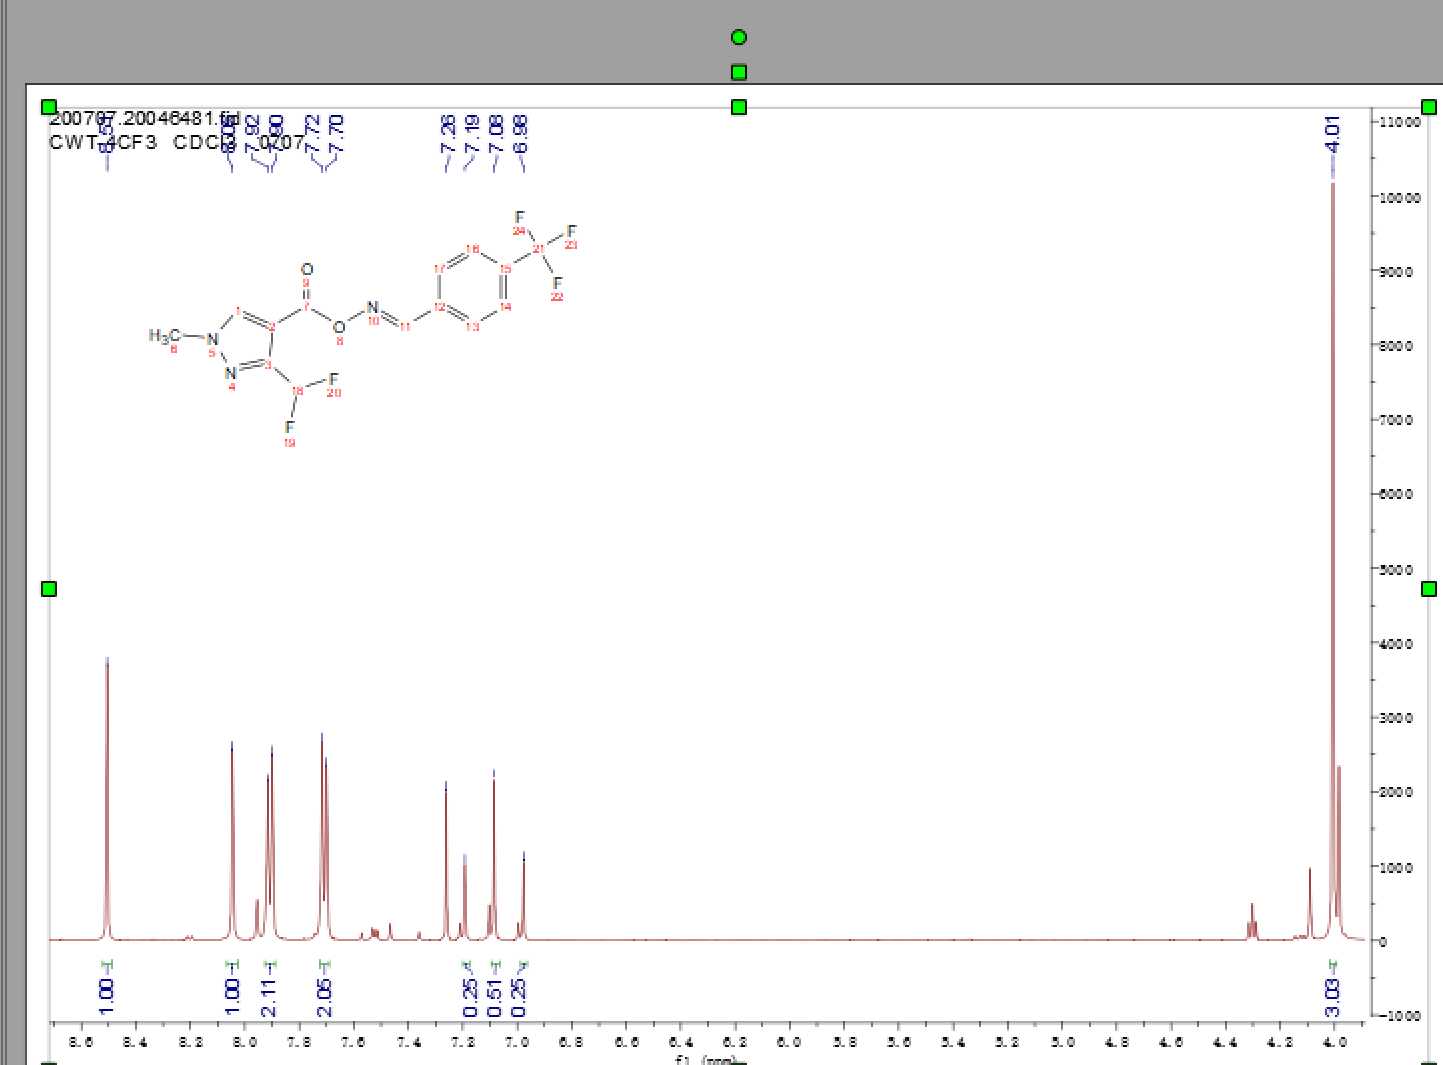


The 1H NMR of compound 5m


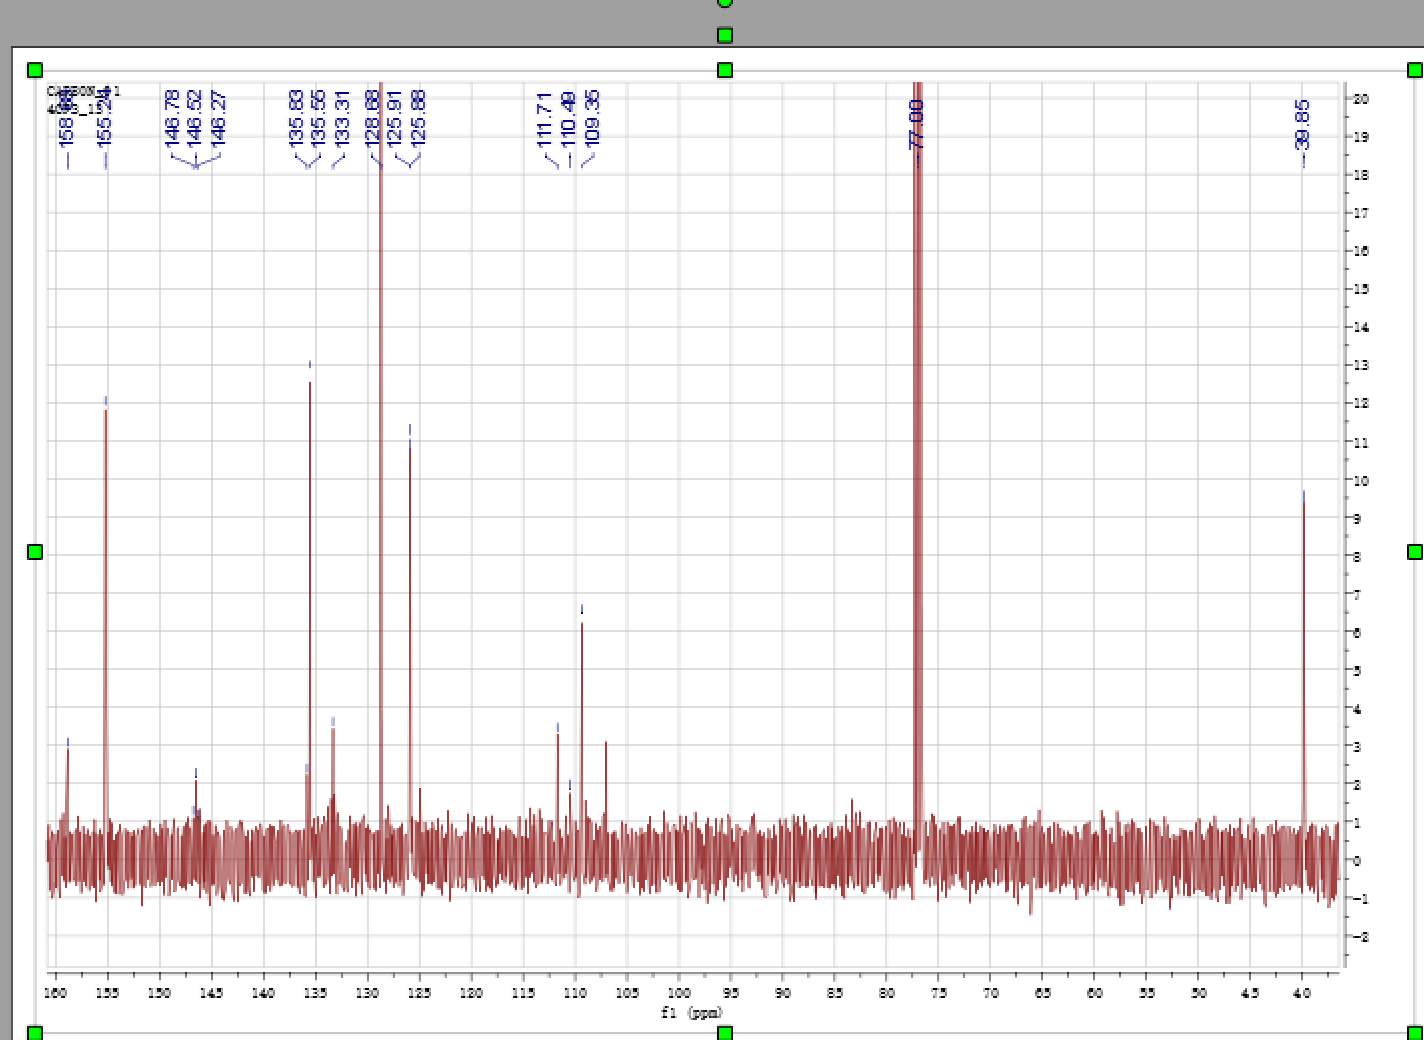


The 13C NMR of compound 5m


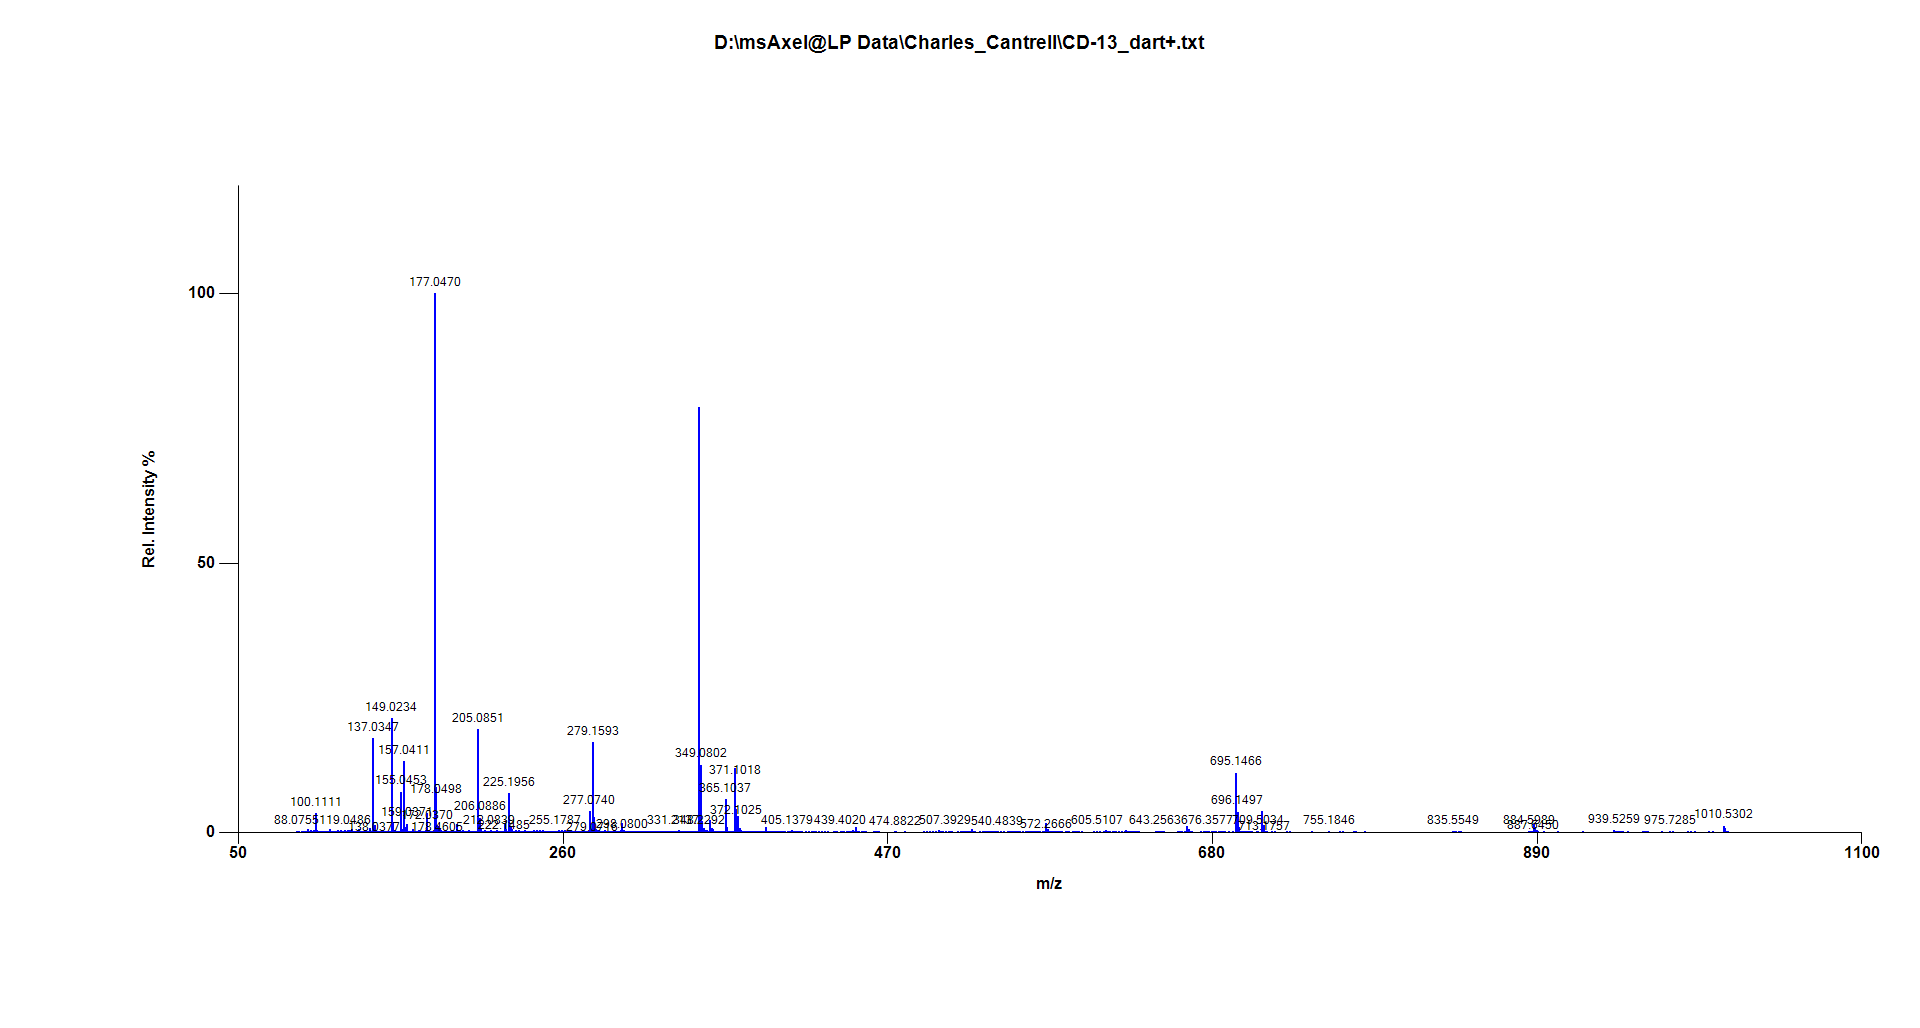


The HRMS of compound 5m

**
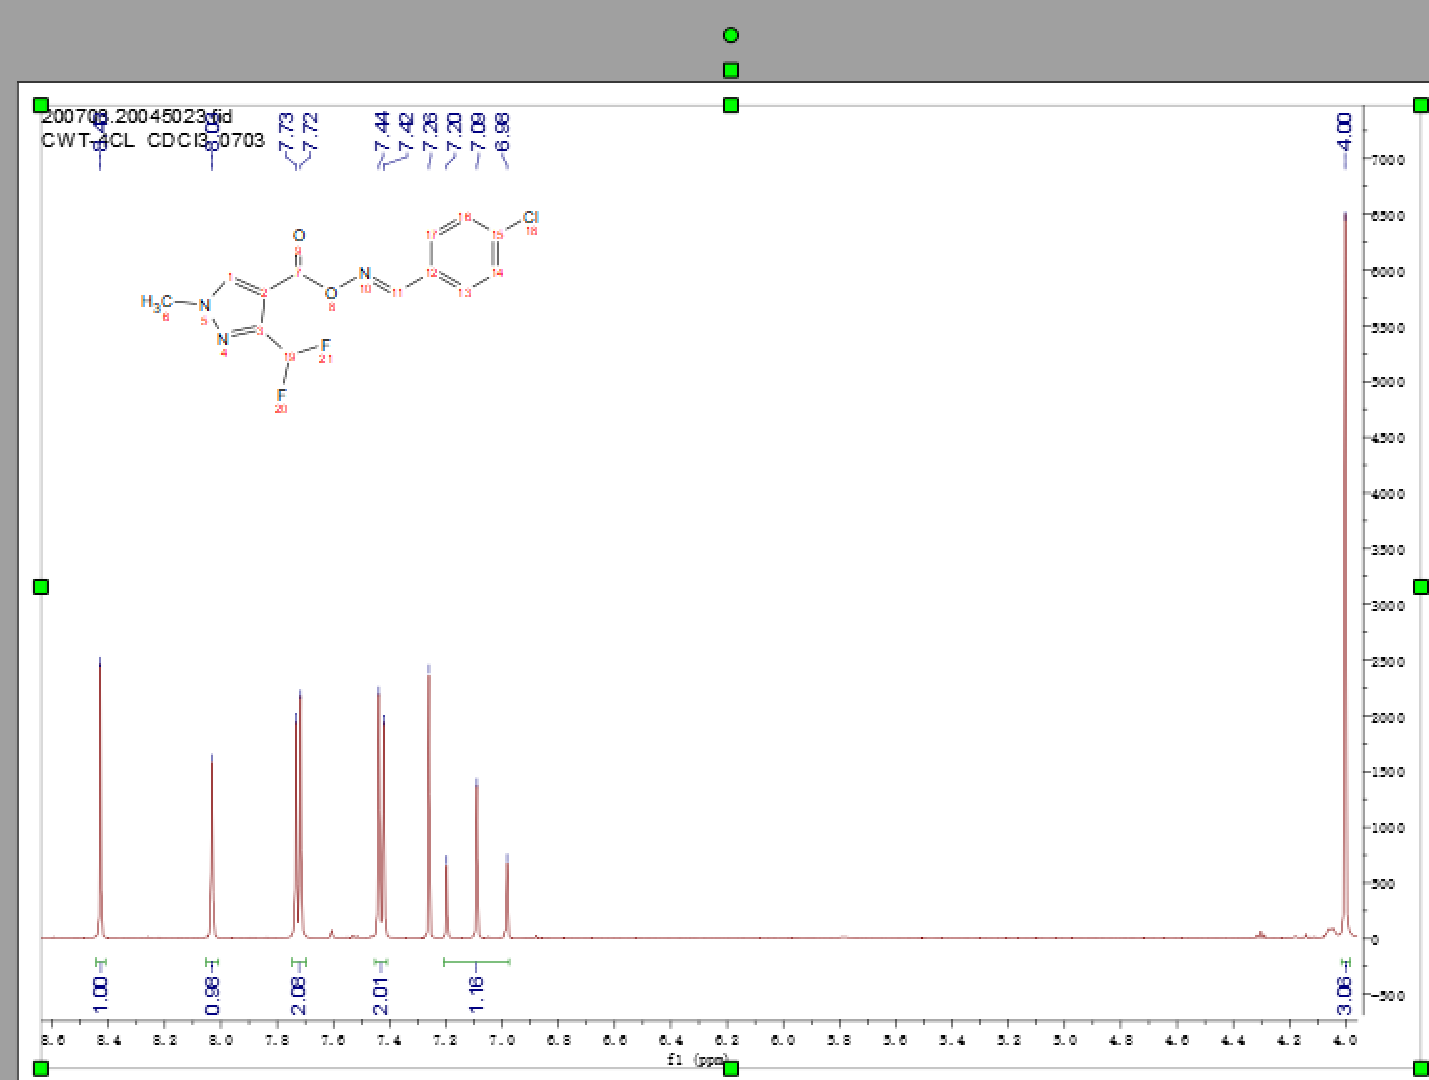
**

The 1H NMR of compound 5n

**
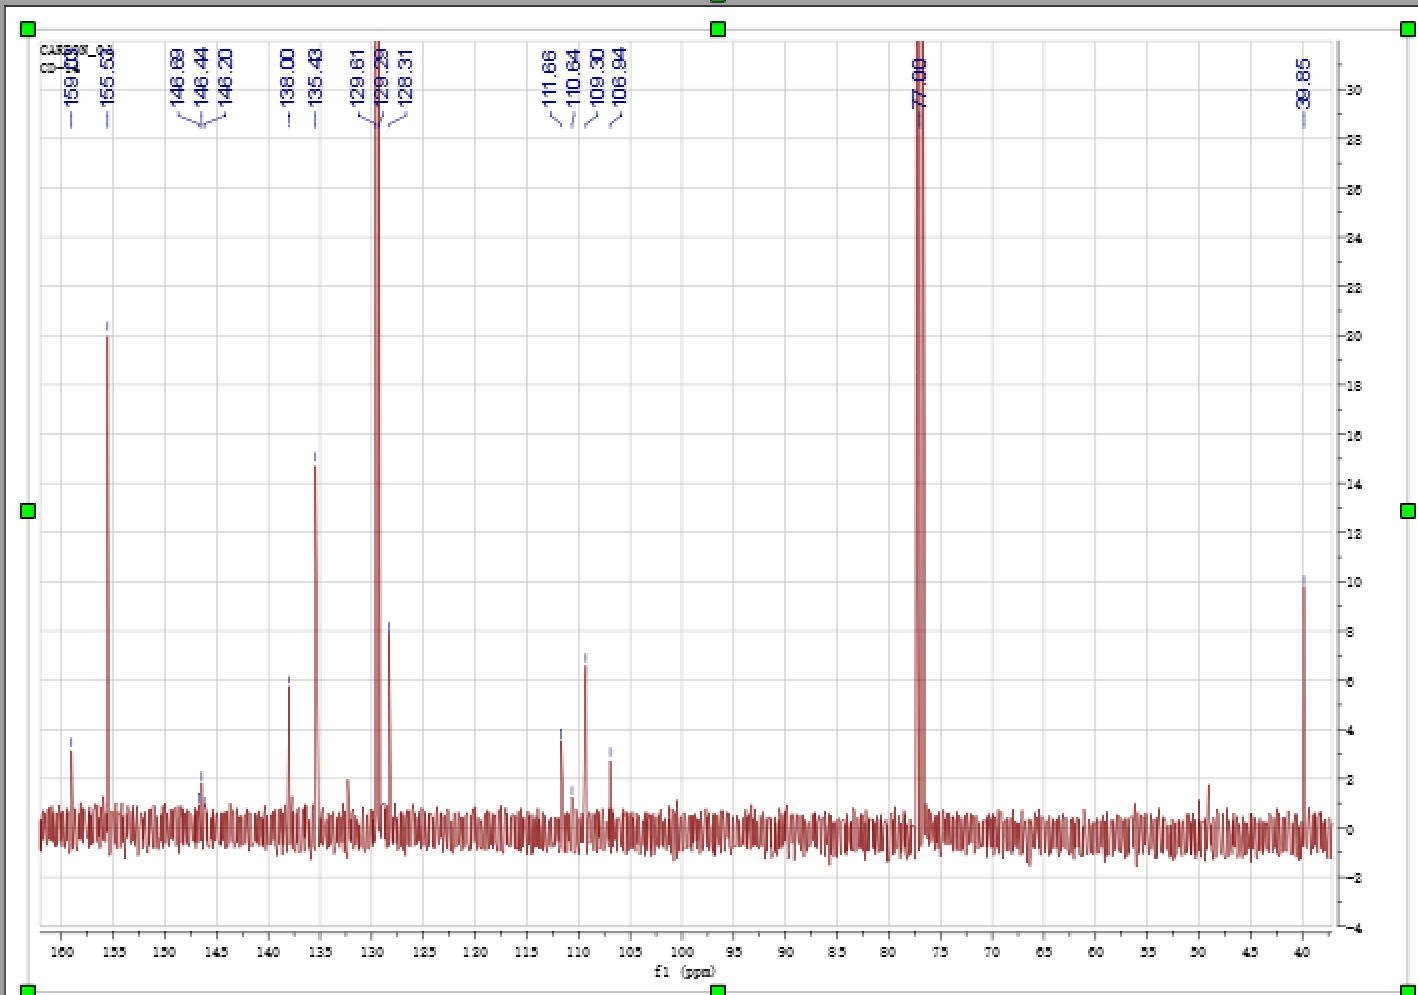
**

The13C NMR of compound 5n


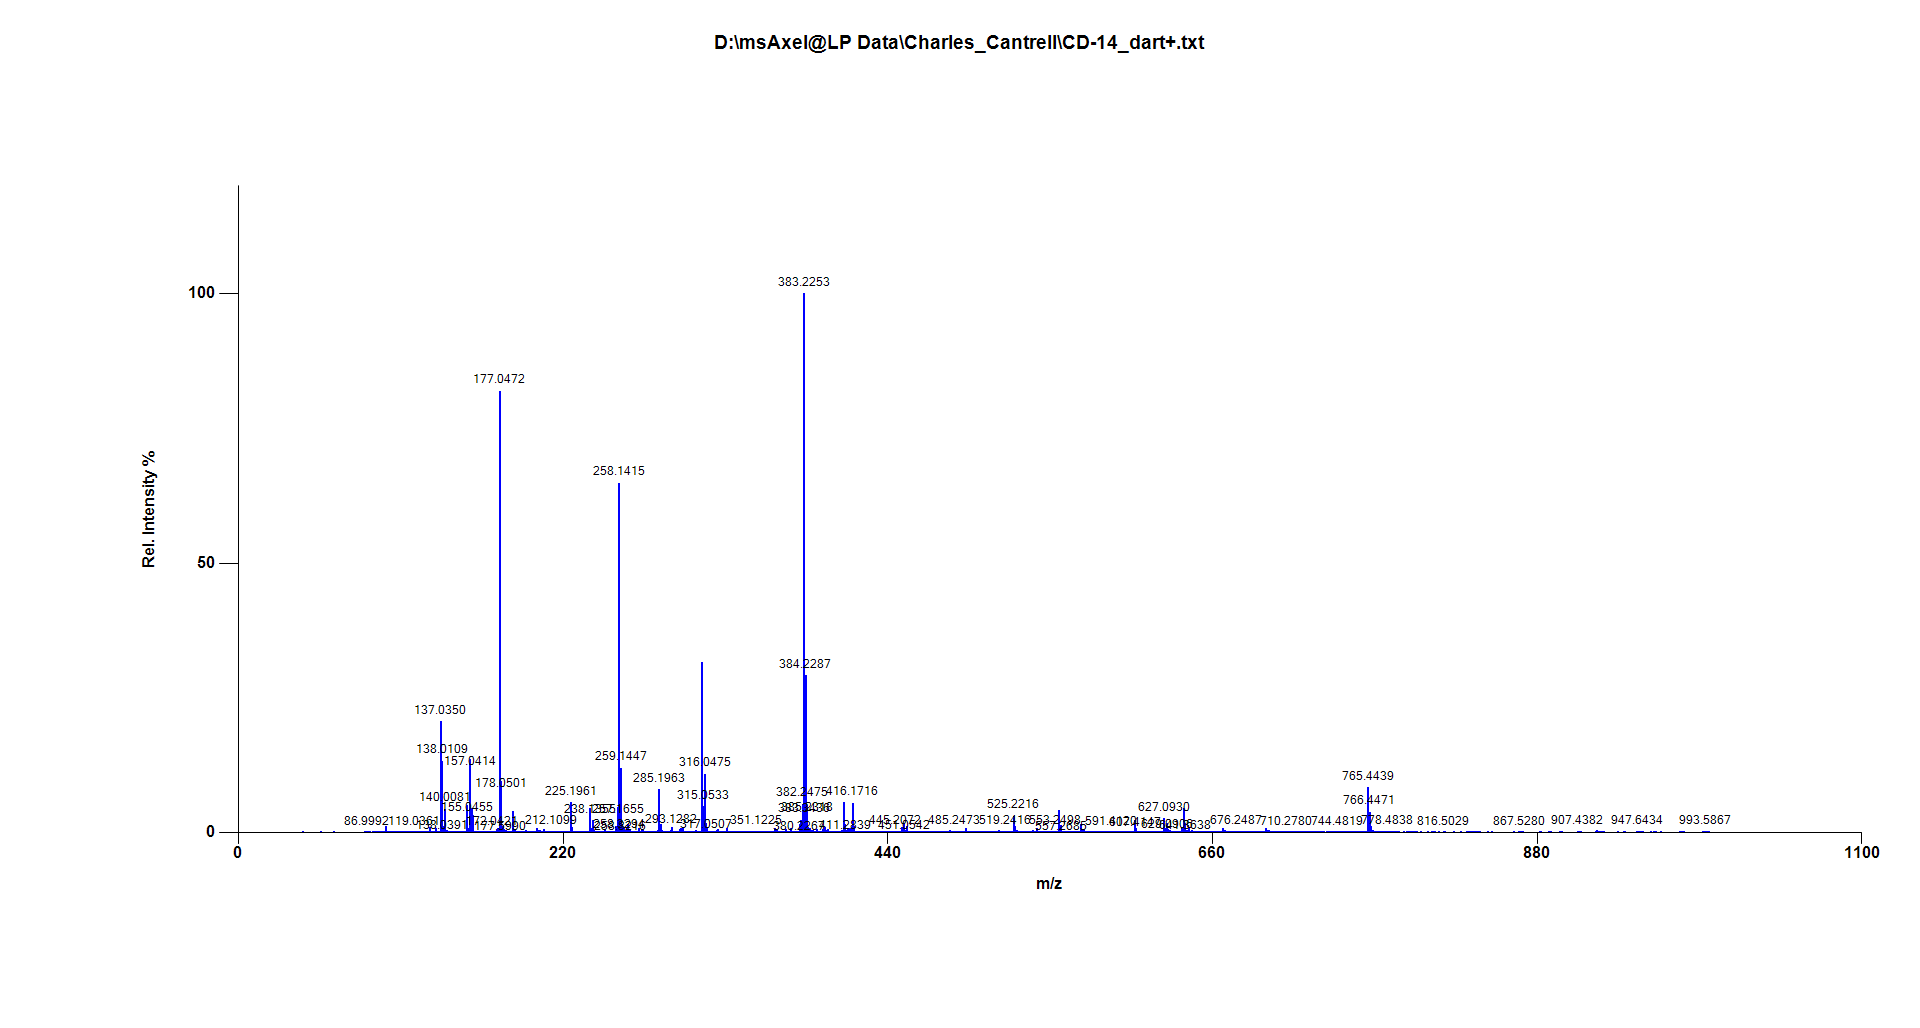


The HRMS of compound 5n

**
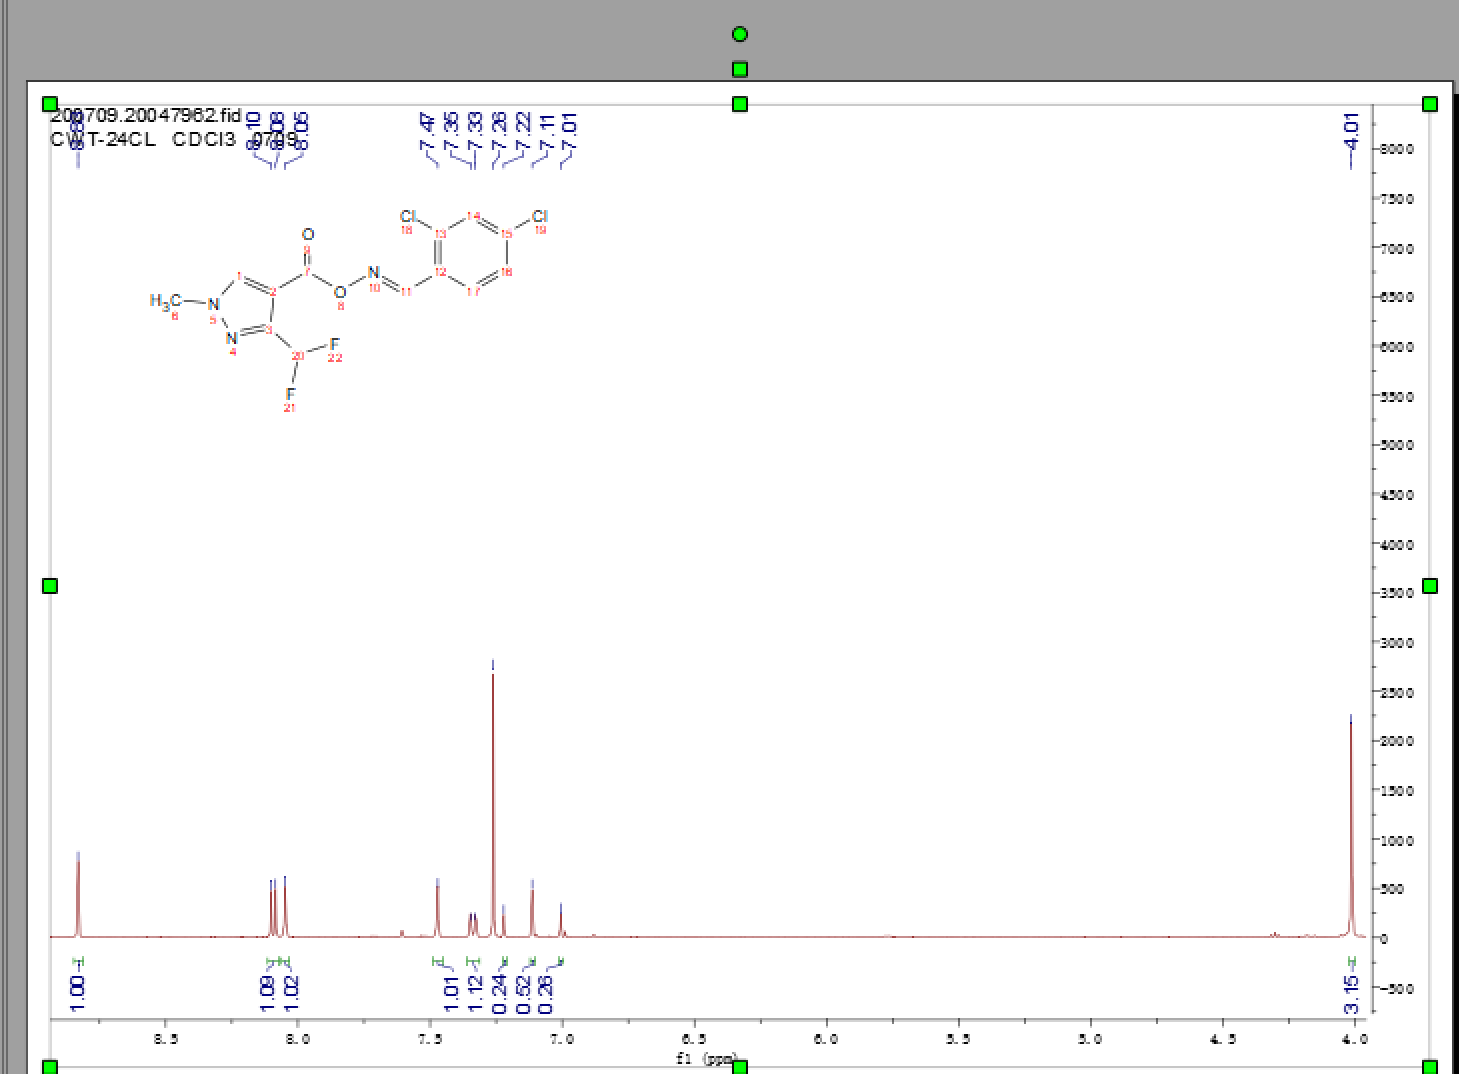
**

The 1H NMR of compound 5o


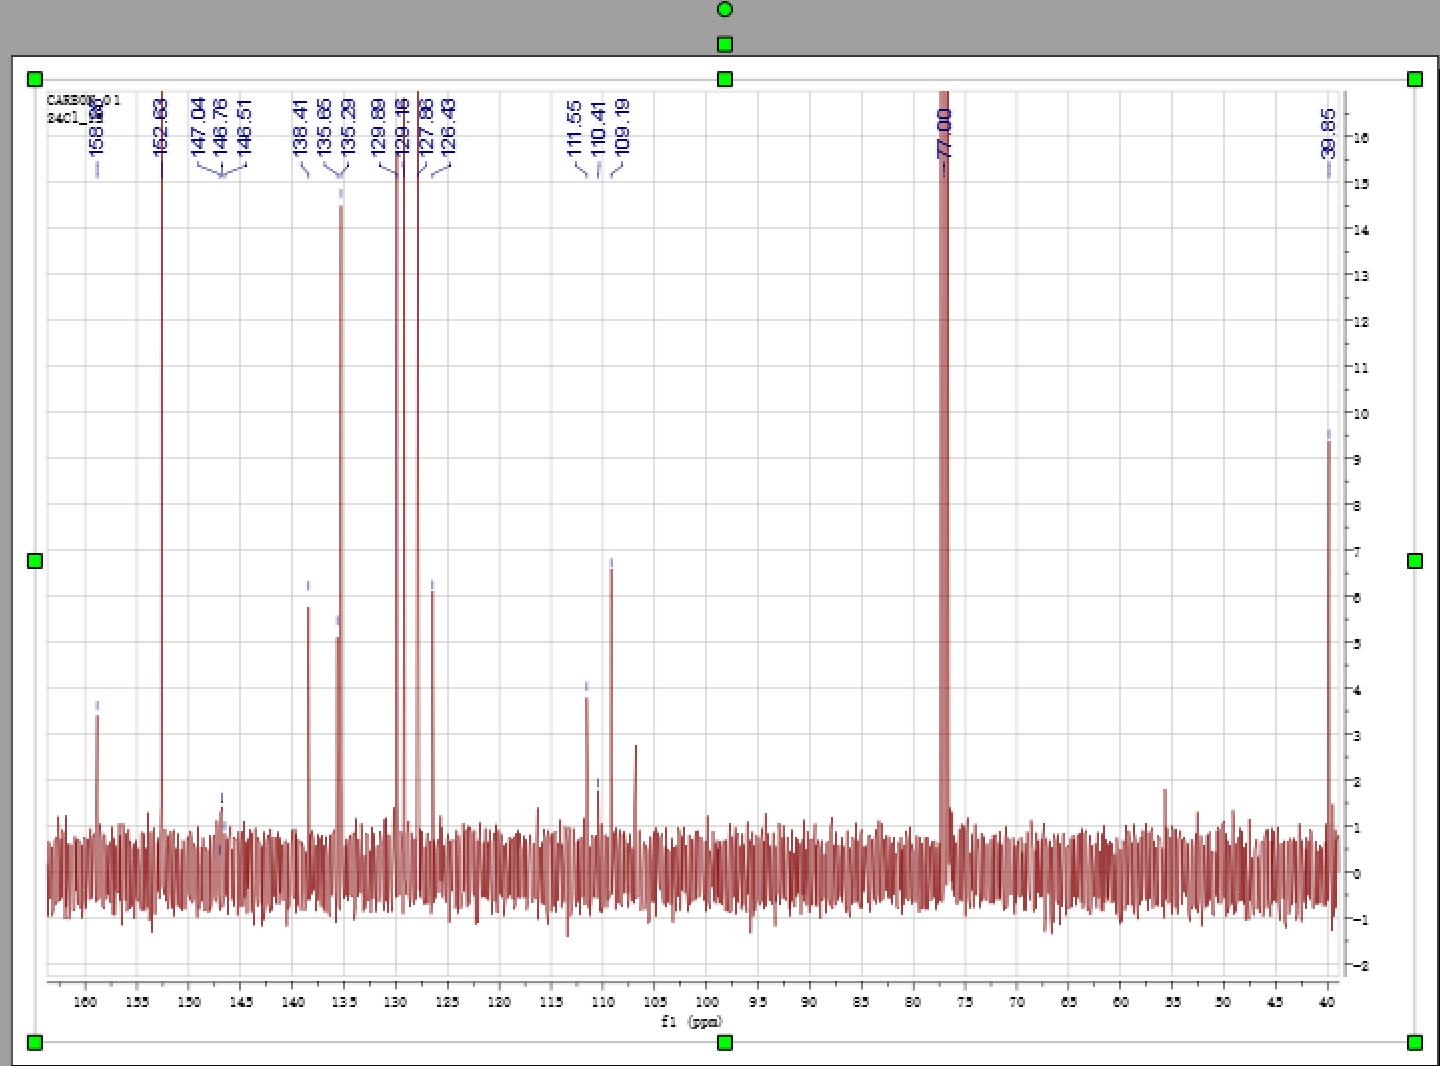


The 13C NMR of compound 5o


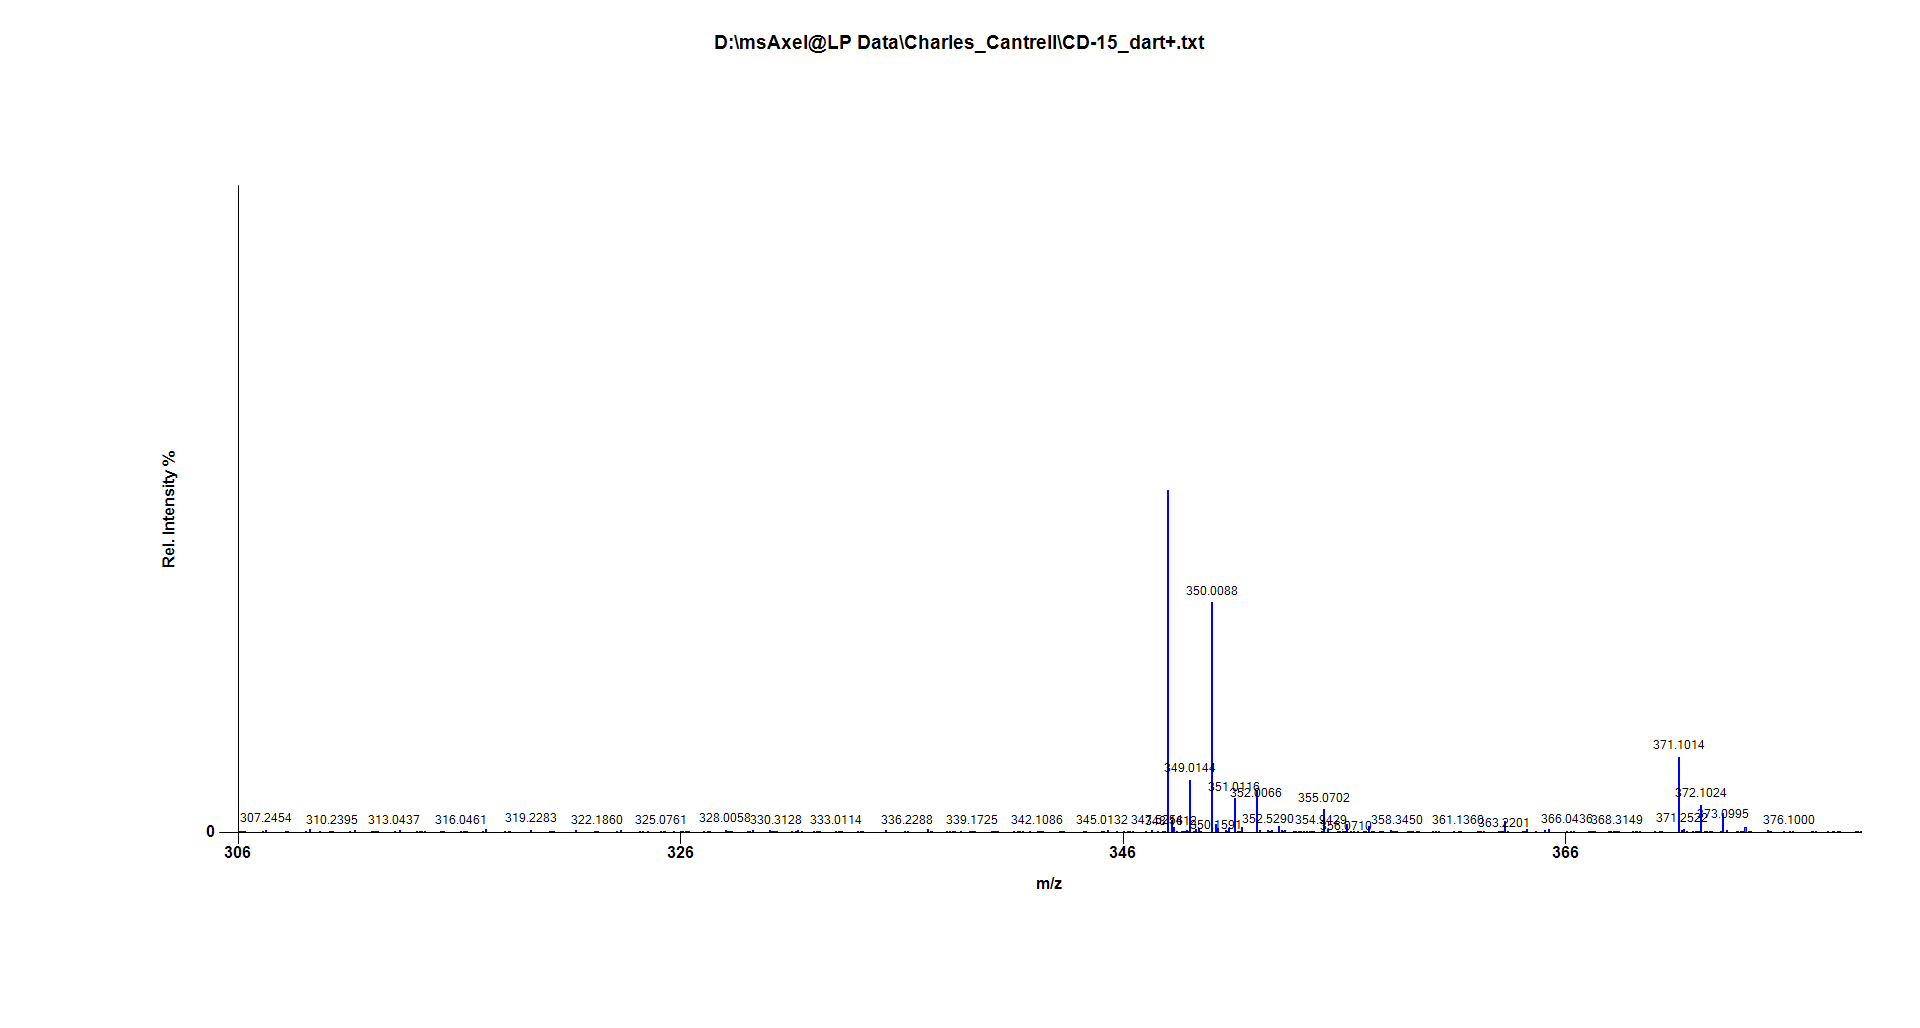


The HRMS of compound 5o
